# Supplementary material
Source: publisher figshare collection journal article supplement (https://gsapubs.figshare.com/articles/dataset/_/12540365)
Supplement: Supplementary file 1 [file 1]

## Sheet: normalized data
Volcano	Position	Sample name	Reference	SiO2	TiO2	Al2O3	Fe2O3	FeOT	MnO	MgO	CaO	K2O	Na2O	P2O5	TOTAL	TA			Nb/Y	La/Yb	Li	Be	B	Sc	Ti	V	Cr	Mn	Co	Ni	Cu	Zn	Rb	Sr	Y	Zr	Nb	Cs	Ba	La	Ce	Pr	Nd	Sm	Eu	Gd	Tb	Dy	Ho
Almas Santas	Arc Front	ALS-66	1	53.8889	0.757576	16.3131	9.24242	8.31313	0.141414	8.08081	8.43434	0.535354	3.38384	0.151515	100	3.91919			0.16417	4.83088	8.42			26.24		217.17	446.14	1068.79	38.48	148.88	40.08	83.46	7.18	450.69	16.02	73.06	2.63	0.32	287.6	6.57	15.4	2.27	10.65	2.72	0.9	2.87	0.46	2.77	0.55
Almas Santas	Arc Front	AS-1A	1	68.7513	0.315747	16.3475	3.40191	3.0658	0.0611122	1.40558	3.36117	2.0167	4.57323	0.101854	100	6.58994			0.356436	17.7045	17.74	0.74		6.7		64.55	37.65	416.19	9.54	17.64	37.73	51.86	43.97	463.8	5.05	44.16	1.8	0.55	884.96	7.79	15.6	2.11	8.5	1.72	0.56	1.41	0.18	0.99	0.18
Almas Santas	Arc Front	ALS 02C	2	55.2023	0.807347	16.702	9.06247	8.1542	0.131194	6.66061	7.86154	0.756888	3.56242	0.161469	100	4.31931			0.248276	7.76923	8.2	0.62	7.6	23		200	304			107			11.7	495	14.5	83	3.6		325	10.1	21.5		12.9	3	0.96	3.3		2.5
Almas Santas	Arc Front	ALS 04	2	53.8609	0.767134	16.1805	9.44787	8.50913	0.141314	8.01454	8.41829	0.555163	3.40164	0.151408	100	3.9568			0.167742	5.32374	7.8	0.52	8.2	25		217	433			152			7.5	428	15.5	73	2.6		236	7.4	14.5		10.8	2.9	0.88	2.95		2.65
Almas Santas	Arc Front	ALS 10	2	56.5638	0.756201	16.7473	8.33837	7.5116	0.120992	6.30167	7.35027	0.796532	3.68018	0.171406	100	4.47671			0.204082	7.08661	7.7	0.66	7.15	22		200	275			104			13.2	480	14.7	82	3		345	9	18.5		12.7	3	0.93	3.1		2.5
Almas Santas	Arc Front	ALS 12A	2	55.0913	0.797255	16.5506	8.99183	8.08356	0.131194	6.73125	8.12393	0.807347	3.50187	0.181653	100	4.30921			0.217105	7.8125	7.6	0.75		24.5		216	336			112			13.7	496	15.2	85	3.3		337	10	20.5		13	3.2	0.96	2.9		2.6
Almas Santas	Arc Front	ALS 20A	2	53.7957	0.767212	16.2124	9.44882	8.4999	0.141328	8.02544	8.43933	0.545124	3.42217	0.151423	100	3.96729			0.175325	5.1145	7.3	0.58		26.5		228	465			150			8	430	15.4	72	2.7		279	6.7	15.5		10.2	2.75	0.86	2.7		2.6
Almas Santas	Arc Front	ALS 24B	2	69.7161	0.300933	16.2403	3.03942	2.73849	0.0300933	1.10342	2.97924	2.21687	4.59424	0.0802488	100	6.81111			0.4	19.7674	13.6	0.9		6.5		69	51			16.5			58.5	456	5.5	76	2.2		900	8.5	17.2		8.7	1.9	0.5	1.4		1
Almas Santas	Arc Front	ALS 30	2	58.2258	0.756048	16.8548	8.0746	7.26815	0.120968	4.76815	6.96573	0.947581	3.91129	0.181452	100	4.85887			0.246377	7.5	9	0.72		18		186	210			65			15.4	480	13.8	86	3.4		377	9	18.5		12.3	3	0.9	3		2.55
Almas Santas	Arc Front	ALS 30E	2	46.1975	1.45823	12.4658	12.4658	11.2203	0.141772	13.438	12.7797	0.263291	1.98481	0.0506329	100	2.2481			0.0993789	1.30769	10.1	0.31		61		450	426			317			2.4	226	16.1	30	1.6		64	1.7	5.4		7.5	2.6	0.91	3.2		3.05
Almas Santas	Arc Front	ALS 3OF	2	54.1131	0.435091	5.90914	11.9397	10.7457	0.182131	15.2181	11.9397	0.182131	1.19397	0.0809471	100	1.3761			0.0583333	2.47525	9.1	0.28		53		300	1045			325			2.3	160	12	30	0.7		63	2.5	7.5		7.2	2.45	0.62	2.45		2.3
Almas Santas	Arc Front	ALS 47	2	64.4042	0.573152	17.1946	5.41981	4.87682	0.0904977	2.5641	4.55505	1.13625	4.55505	0.0502765	100	5.6913			0.420455	10	12.8	0.7		11		106	75			27			8.9	452	8.8	132	3.7		660	8.8	20.5		9.7	1.9	0.82	1.95		1.6
Almas Santas	Arc Front	ALS 50B	2	63.3018	0.482606	17.5146	5.35894	4.82606	0.0804343	2.34265	5.42932	1.30706	4.53449	0.180977	100	5.84154			0.259259	10.2913	11	0.82		10		111	48			22			24.5	518	10.8	102	2.8		530	10.6	21		12	2.5	0.77	2.35		1.8
Almas Santas	Arc Front	ALS 51	2	60.2296	0.674587	17.8111	6.78615	6.10149	0.0906162	3.31253	6.17197	1.07733	4.33951	0.191301	100	5.41683			0.243697	9.15094	9.6	0.82		15.2		156	77			41			18.2	530	11.9	100	2.9		465	9.7	20.5		12	2.75	0.87	2.75		2.05
Almas Santas	Arc Front	ALS 53	2	54.1557	0.726246	15.9471	8.60399	7.74662	0.131128	8.60399	8.60399	0.574945	3.3488	0.161388	100	3.92374			0.142857	5.03759	7.3	0.57		27		190	525			186			7.4	458	14	69	2		265	6.7	15		10.2	2.4	0.84	2.75		2.4
Almas Santas	Arc Front	ALS 61	2	75.6456	0.0900901	15.2252	1.08108	0.970971	0.04004	0.32032	1.3013	2.38238	3.99399	0.03003	100	6.37638			1.28947	48.1481	30	1.14		1.7		9	26			3			50	221	3.8	42	4.9		905	13	28		10.5	1.85	0.43	1.55		0.7
Almas Santas	Arc Front	ALS 68	2	59.2525	0.65478	16.5609	7.35368	6.61831	0.110809	5.01662	6.68883	1.01743	3.91861	0.161177	100	4.93603			0.232394	7.65152	10.8	0.74		21		170	215			70			18.3	456	14.2	93	3.3		425	10.1	19.5		12.8	2.9	0.86	2.7		2.5
Almas Santas	Arc Front	ALS 69D	2	59.9275	0.644382	18.1333	6.79621	6.12163	0.110753	3.02054	6.323	1.19815	4.32944	0.191301	100	5.52759			0.212329	7.35714	12.5	0.78		15		160	28			20			20.1	535	14.6	104	3.1		435	10.3	20.5		12	2.6	0.85	2.7		2.45
Almas Santas	Arc Front	ALS 71	2	58.4282	0.725441	17.1285	7.63728	6.87154	0.110831	4.69521	6.81108	0.967254	4.0806	0.18136	100	5.04786			0.292683	9.01961	8.7	0.71		16.5		171	177			62			16.5	506	12.3	85	3.6		405	9.2	20		12.3	2.8	0.92	2.8		2.25
Almas Santas	Arc Front	ALS 72C	2	63.7624	0.512511	17.4555	4.93418	4.44176	0.0703447	2.16059	5.14521	1.53753	4.73319	0.180886	100	6.27073			0.278846	13.1111	9.2	0.87		11		112	51			29			27.3	540	10.4	94	2.9		570	11.8	23		12.5	2.5	0.79	2.5		1.85
Almas Santas	Arc Front	ALS 75B	2	56.2771	0.826863	17.0616	8.53081	7.68378	0.121004	5.78804	7.62327	0.786528	3.64021	0.19159	100	4.42674			0.243056	8.16667	7	0.7		20.5		200	300			87			10.2	490	14.4	87	3.5		380	9.8	19.5		13.4	3.2	0.99	3.2		2.75
Almas Santas	Arc Front	ALS 80B	2	58.9225	0.704935	16.7674	7.00906	6.3142	0.110775	4.90433	7.10977	1.13797	3.857	0.171198	100	4.99496			0.28	9.54545	9.3	0.74		18.5		168	243			74			19.8	515	12.5	93	3.5		440	10.5	21		12.5	2.9	0.87	2.9		2.3
Almas Santas	Arc Front	ALS 82A	2	62.0436	0.60344	17.7311	5.71256	5.13929	0.0704013	2.75571	5.61199	1.15659	4.71689	0.170975	100	5.87348			0.269231	13.4524	7.6	0.79		11.3		126	49			47			19.2	545	10.4	96	2.8		478	11.3	19.5		12.8	2.7	0.79	2.75		1.9
Almas Santas	Arc Front	ALS 85B	2	61.7203	0.674044	17.2435	5.84507	5.26157	0.0804829	3.17907	5.89537	1.14688	4.61771	0.181087	100	5.76459			0.301887	11.6667	10.2	0.85		12		143	129			47			19.1	540	10.6	102	3.2		465	10.5	21.5		12.8	2.65	0.83	2.7		1.95
Almas Santas	Arc Front	ALS 88	2	56.4775	0.746043	16.7456	8.11574	7.3092	0.12098	6.09941	7.71247	0.826696	3.78062	0.18147	100	4.60732			0.2	7.6378	7.8	0.72		22.5		200	293			101			13.9	500	14.5	88	2.9		365	9.7	19.5		13	3.1	0.93	3.4		2.5
Almas Santas	Arc Front	ALS 92	2	59.1033	0.675063	17.1587	7.43577	6.69018	0.110831	4.34257	6.78086	0.97733	3.98992	0.171285	100	4.96725			0.230769	7.41935	5.3	0.76		19		180	135			51			17.7	475	13	95	3		408	9.2	20		11.8	2.9	0.84	3.1		2.3
Atacazo	Arc Front	ATAC-12A	1	57.7737	0.675539	16.6364	8.55011	7.69308	0.120992	5.46481	7.17887	0.766284	3.5491	0.141157	100	4.31539			0.209743	5.57373	12.812			22.698		192.511	231.021	919.366	28.5792	63.232	35.1499	87.0116	14.7643	436.415	13.9484	69.2754	2.92557	0.30037	371.134	6.71327	14.7508	2.12185	9.66634	2.39018	0.800124	2.53113	0.402439	2.40366	0.472814
Atacazo	Arc Front	ATAC 02C	2,11	65.849	0.522771	16.7186	5.26792	4.74515	0.0603197	1.65879	4.82558	1.14607	4.35307	0.120639	100	5.49915			0.4	16.6667				6.2		106	12			4			23	442	7	72	2.8		612	7.5	16		9.7	2.4	0.71	2.8		1.4
Atacazo	Arc Front	ATAC 008	2,11	61.11	0.604351	16.6398	7.24214	6.51692	0.100725	3.89807	6.13417	1.0979	3.76712	0.130943	100	4.86503			0.242188	7.7193	16	0.76	15	15.6		160	130			37			23	412	12.8	84	3.1		512	8.8	18.7		12	2.6	0.77	2.4		2.2
Atacazo	Arc Front	ATAC 012B	2	58.6141	0.655638	16.6936	8.47287	7.62558	0.131128	4.90216	6.93968	0.89772	3.41941	0.121041	100	4.31713			0.145349	3.29787	12	0.63	16.2	28		197	135			34			18.5	318	17.2	81	2.5		400	6.2	13.5		9.2	2.1	0.75	2.3		2.75
Atacazo	Arc Front	ATAC 001	2	60.7046	0.603926	16.8998	6.55259	5.89834	0.0905888	4.29794	6.06945	1.06694	4.24761	0.120785	100	5.31454			0.186567	6.25	10	0.79	9.55	18.2		147	137			43			19	420	13.4	89	2.5		455	8	16.5		10.2	2.4	0.76	2.8		2.1
Atacazo	Arc Front	ATAC 004	2	62.1314	0.623931	16.7958	6.30975	5.67576	0.0905706	3.99517	5.42417	1.14723	3.98511	0.130824	100	5.13233			0.24812	8.62069	13.1	0.87		17		155	160			55			20.3	380	13.3	102	3.3		730	10	19		11.2	2.45	0.79	2.6		2.3
Atacazo	Arc Front	ATAC 005	2	61.1536	0.614053	16.4486	6.58345	5.91907	0.0905979	4.3185	6.19086	1.01671	4.11717	0.130864	100	5.13388			0.208633	5.92	9.9	0.82		19		155	152			50			17	414	13.9	91	2.9		480	7.4	16		10	2.45	0.78	2.7		2.2
Atacazo	Arc Front	ATAC 058	2	61.4192	0.674383	16.7489	6.62305	5.95873	0.0905888	3.92552	5.68697	1.12733	4.22748	0.140916	100	5.35481			0.246377	8.62069	10.6	0.87		16		150	124			51			20.3	398	13.8	106	3.4		502	10	18.7		13	3.1	0.86	3.05		2.4
Atacazo	Arc Front	ATAC 071	2	61.3673	0.704793	15.9484	6.78615	6.11156	0.0805477	4.32944	6.22231	1.19815	3.85622	0.181232	100	5.05437			0.307143	9.33333	6.9	0.85		16.3		165	184			63			24	485	14	105	4.3		553	11.2	23		13.1	2.9	0.87	2.6		2.4
Atacazo	Arc Front	ATAC 048A	2	60.8481	0.654714	16.2067	7.25222	6.52699	0.100725	4.26068	6.58743	0.936745	3.73691	0.141015	100	4.67365			0.260163	7.95918	10.3	0.67		16		170	179			45			16.7	428	12.3	82	3.2		475	7.8	17		10.5	2.65	0.78	2.8		2.25
Atacazo	Arc Front	ATAC 048B	2	60.8661	0.644512	16.2336	7.15005	6.43505	0.100705	4.27996	6.64653	0.896274	3.75629	0.140987	100	4.65257			0.241667	8.19149	9.5	0.66		15.8		168	182			45			15	430	12	81	2.9		470	7.7	16.5		10.4	2.7	0.79	2.55		2.15
Atacazo	Arc Front	ATAC 049	2	62.5252	0.634313	16.1398	6.98752	6.28272	0.0906162	3.32259	5.68868	1.13774	4.03745	0.140959	100	5.17519			0.297297	9.14894	15.3	0.74		14		150	136			32			21.4	412	11.1	95	3.3		550	8.6	18.5		11.3	2.75	0.77	2.6		2.05
Atacazo	Arc Front	ATAC 046A	2	59.1349	0.655374	16.2432	8.12664	7.30994	0.120992	5.25308	6.8663	0.857028	3.42811	0.131075	100	4.28514			0.185897	5.17241	13.3	0.64		22.5		186	215			56			17	363	15.6	80	2.9		400	7.5	16		10	2.7	0.8	2.7		2.65
Atacazo	Arc Front	ATAC 046B	2	59.7621	0.645096	16.4903	7.87219	7.08598	0.110876	4.68703	6.74327	0.876928	3.46739	0.131035	100	4.34432			0.184713	5.66667	13.3	0.68		22		176	185			42			17.6	365	15.7	82	2.9		425	8.5	17		11	3.05	0.85	3		2.75
Atacazo	Arc Front	ATAC 056	2	60.3346	0.644966	16.1947	7.69928	6.93339	0.110854	4.87756	6.4799	0.79613	3.48685	0.141086	100	4.28298			0.223022	5.22388	10.6	0.66		22.5		175	230			57			16.5	360	13.9	82	3.1		410	7	15.5		9.3	2.7	0.76	2.75		2.3
Atacazo	Arc Front	ATAC 086	2	60.6571	0.644966	16.3761	7.86053	7.07447	0.120931	3.87988	6.85277	0.896906	3.36592	0.131009	100	4.26282			0.202703	6.31579	13	0.68		19		184	125			34			20.8	352	14.8	82	3		520	8.4	18		11	2.8	0.81	2.7		2.6
Atacazo	Arc Front	ATAC 066B	2	60.9813	0.654846	16.0085	7.59621	6.83055	0.11082	4.25146	6.37719	1.03768	3.59661	0.151118	100	4.63429			0.259259	8	14.3	0.81		18.4		171	160			46			21	399	13.5	90	3.5		493	9.6	20		11.5	2.9	0.82	2.8		2.3
Atacazo	Arc Front	ATAC 087	2	61.0176	0.604534	16.0605	7.57683	6.82116	0.110831	4.38287	6.38791	1.03778	3.44584	0.130982	100	4.48363			0.28125	6.52542	15.4	0.7		17.5		167	178			45			23.3	353	12.8	85	3.6		550	7.7	16.5		11	2.5	0.77	2.45		2.3
Atacazo	Arc Front	ATAC 085	2	61.1665	0.664853	16.2285	7.28317	6.55787	0.110809	3.89846	6.48736	1.11816	3.6164	0.151103	100	4.73456			0.25641	7.95455	12.4	0.64		17		172	162			43			23.7	404	15.6	92	4		615	10.5	21		13.2	3.15	0.87	3		2.65
Atacazo	Arc Front	ATAC 010	2	61.1396	0.614115	16.863	6.72506	6.05054	0.0906071	4.04712	5.99013	1.07722	3.99678	0.130877	100	5.074			0.193333	6.38298				19		157	132			29			20.5	382	15	96	2.9		532	9	18		12.3	2.6	0.8	2.7		2.45
Atacazo	Arc Front	ATAC 062	2	61.2029	0.614548	15.9077	7.55591	6.80032	0.11082	4.28168	6.43764	1.04775	3.46565	0.130969	100	4.5134			0.253731	6.66667	16.4	0.71		18		175	184			47			23	356	13.4	89	3.4		535	8	16.5		10.5	2.8	0.8	2.8		2.3
Atacazo	Arc Front	ATAC 043	2	61.4408	0.634761	15.9698	7.52645	6.77078	0.110831	4.54408	5.86398	0.947103	3.5869	0.130982	100	4.53401			0.22069	6.07692	13.4	0.68		21		165	195			52			19.9	350	14.5	86	3.2		450	7.9	16.7		9.8	2.4	0.77	2.5		2.4
Atacazo	Arc Front	ATAC 082	2	62.0846	0.60423	16.566	7.13998	6.42497	0.0906344	3.26284	6.47533	0.996979	3.36354	0.130916	100	4.36052			0.22	7.25806	10.5	0.7		19		170	95			23			21.4	386	15	79	3.3		980	9	17		11	2.6	0.82	2.7		2.4
Atacazo	Arc Front	ATAC 067A	2	62.5478	0.574018	16.0725	7.06949	6.36455	0.100705	3.44411	5.95166	1.17825	3.64552	0.120846	100	4.82377			0.279661	7.61905	17.5	0.72		16		154	114			33			27.5	345	11.8	89	3.3		578	8	17		9.2	2.35	0.73	2.2		2.05
Atacazo	Arc Front	ATAC 101B	2	56.448	0.716448	15.3179	8.97074	8.07265	0.131181	7.42684	8.18365	0.716448	2.8557	0.131181	100	3.57215			0.2	5.40323	11.2	0.56		25		208	395			57			9.5	395	13.5	77	2.7		370	6.7	14		9.7	2.4	0.81	2.6		2.4
Atacazo	Arc Front	ATAC 101-Ie	2	55.0363	0.696407	15.6338	9.33589	8.40735	0.131207	7.69075	9.25515	0.524828	2.53331	0.0908357	100	3.05813			0.182692	5.15789	21.2	0.43		30		315	350			51			9.1	364	10.4	51	1.9		240	4.9	10		6.3	1.9	0.62	1.75		1.8
Atacazo	Arc Front	ATAC 101J	2	56.4121	0.746645	16.0428	8.97992	8.08193	0.131167	6.37675	8.04157	0.837453	3.18838	0.141257	100	4.02583			0.208054	5.48872	11.6	0.66		24.5		210	250			41			9.6	390	14.9	76	3.1		360	7.3	15		10.5	2.6	0.86	2.9		2.65
Atacazo	Arc Front	ATAC 083	2	61.1509	0.675199	16.6784	7.69928	6.93339	0.100776	3.23491	6.26827	1.08838	3.71863	0.151164	100	4.80701			0.303279	10.4255	12.7	0.7		13.5		192	54			22			22	425	12.2	83	3.7		540	9.8	19		11.7	2.85	0.81	2.8		2.3
Atacazo	Arc Front	ATAC 105	2	62.3339	0.583971	15.9384	6.90697	6.22231	0.0906162	3.7354	6.20217	1.10753	3.63472	0.151027	100	4.74225			0.245455	8.84211	13.8	0.7		16		154	146			40			23	389	11	88	2.7		558	8.4	17		9.9	2.5	0.74	2.55		1.95
Atacazo	Arc Front	ATAC 063	2	60.5361	0.695354	16.1443	7.76983	6.99385	0.100776	4.24267	6.66129	0.856596	3.61786	0.151164	100	4.47445			0.282051	8.42105	10.9	0.68		16.6		176	168			43			16.7	399	11.7	79	3.3		385	8	17		10.8	3	0.84	2.8		2.1
Atacazo	Arc Front	ATAC 069	2	62.1513	0.634505	15.9231	7.22127	6.49612	0.100715	3.66603	6.30476	0.856078	3.71639	0.151073	100	4.57246			0.309091	9.26316	8.4	0.77		15.3		158	139			37			20	387	11	88	3.4		460	8.8	17.5		11.7	2.8	0.78	2.7		2
Atacazo	Arc Front	ATAC 059	2	62.145	0.60423	16.0423	7.05942	6.35448	0.100705	3.857	6.07251	1.06747	3.61531	0.140987	100	4.68278			0.292035	8.24742	13.1	0.74		16		158	150			39			23.3	390	11.3	83	3.3		533	8	17		10.1	2.6	0.71	2.5		1.95
Atacazo	Arc Front	ATAC 051	2	62.7392	0.634441	16.3243	6.95871	6.26385	0.0805639	3.2427	5.55891	1.11782	3.89728	0.140987	100	5.01511			0.283333	10.7143	18.8	0.8		14.2		150	132			32			23	407	12	95	3.4		540	10.5	20		14	3.2	0.85	3		2.3
Atacazo	Arc Front	ATAC 050	2	62.5919	0.634377	16.0004	6.91773	6.22294	0.0906253	3.48404	5.74967	1.12778	3.95731	0.140973	100	5.08509			0.286885	9.69388	15.2	0.76		14.4		148	126			31			22.1	408	12.2	96	3.5		545	9.5	19		12.2	2.9	0.82	2.7		2.2
Atacazo	Arc Front	ATAC 097	2	63.6107	0.573614	16.3732	6.43051	5.78645	0.0905706	2.94858	5.64557	1.37869	3.46181	0.130824	100	4.8405			0.293103	9.2	11.3	0.73		13.5		143	82			18			25.8	356	11.6	88	3.4		342	9.2	20		10.7	2.5	0.76	2.6		2.05
Atacazo	Arc Front	ATAC 098	2	63.3857	0.563607	16.4251	6.44122	5.7971	0.0905797	3.05958	5.80717	0.946055	3.79428	0.130837	100	4.74034			0.286957	9.9	10	0.72		13.5		138	84			24			18.1	395	11.5	88	3.3		545	9.9	18.5		11.3	2.8	0.78	2.55		2
Atacazo	Arc Front	ATAC 014A	2	62.2721	0.594219	15.9936	7.06013	6.35512	0.100715	3.84732	6.07312	1.11794	3.52503	0.120858	100	4.64297			0.27193	7.9	10.1	0.79		17		156	132			32			23.6	383	11.4	79	3.1		565	7.9	16		9.6	2.5	0.74	2.5		2.05
Atacazo	Arc Front	ATAC 060	2	62.4836	0.614362	16.054	7.13063	6.41555	0.100715	3.71639	5.81126	1.10787	3.55524	0.141001	100	4.66311			0.303571	7.2	13.7	0.75		16.5		159	150			38			23.3	379	11.2	86	3.4		555	7.2	17		9.6	2.7	0.7	2.5		2.1
Atacazo	Arc Front	ATAC 077	2	61.2494	0.664987	16.4232	7.51637	6.77078	0.100756	3.65743	6.36776	1.01763	3.59698	0.151134	100	4.61461			0.265152	8.14815	15.6	0.77		17		180	127			30			21.7	372	13.2	92	3.5		585	8.8	19.5		11	2.75	0.82	2.8		2.4
Atacazo	Arc Front	ATAC 075	2	61.2835	0.634697	16.2603	7.49547	6.74995	0.100746	3.74773	6.73988	0.977232	3.3649	0.141044	100	4.34213			0.2	6.13924	16.6	0.7		20		178	120			28			23.6	355	17.5	90	3.5		550	9.7	21		12.7	3.25	0.85	3.5		3.05
Atacazo	Arc Front	ATAC 076	2	62.1325	0.614176	16.3915	6.90697	6.22231	0.100685	3.41321	6.3532	1.15787	3.46355	0.151027	100	4.62143			0.316667	10	12.6	0.72		17		165	122			27			24.9	415	12	94	3.8		650	10.1	20.5		11.6	2.7	0.78	2.7		2.2
Atacazo	Arc Front	ATAC 102	2	61.9359	0.584206	16.0153	7.12127	6.40612	0.100725	3.90814	6.31547	1.01732	3.57575	0.141015	100	4.59307			0.267857	7.62376	13.4	0.68		18		164	150			42			20.5	391	11.2	81	3		600	7.7	15.5		9.7	2.35	0.74	2.35		1.8
Atacazo	Arc Front	ATAC 061	2	61.3501	0.61461	16.0504	7.57683	6.82116	0.100756	4.16121	6.1461	1.04786	3.56675	0.141058	100	4.61461			0.285714	6.92308	13.3	0.72		18		175	170			46			21.6	379	11.2	80	3.2		510	7.2	15.5		9.2	2.4	0.73	2.4		2.05
Atacazo	Arc Front	ATAC 011	2	58.419	0.907441	17.1204	8.30813	7.48135	0.110909	4.0734	6.44283	1.16959	4.05324	0.221819	100	5.22283			0.46875	13.8				15		190	96			36			23.5	582	12.8	115	6		556	13.8	30		18	3.8	1.1	3.1		2.55
Atacazo	Arc Front	ATAC 013A	2	58.782	0.897358	16.8179	8.29804	7.46118	0.110909	4.04315	6.64448	1.14943	3.87175	0.221819	100	5.02117			0.437037	14.5631	10.3	0.96		15		188	100			36			22.5	576	13.5	109	5.9		570	15	30		17.5	4	1.14	3.4		2.6
Atacazo	Arc Front	ATAC 013B	2	58.6711	0.907441	16.8885	8.34846	7.5116	0.110909	4.08348	6.55374	1.14943	3.902	0.221819	100	5.05142			0.437037	14.2157	13.7	0.99		15		187	98			35			22.8	577	13.5	108	5.9		555	14.5	29		17	3.75	1.1	3.5		2.55
Atacazo	Arc Front	ATAC 054	2	66.5393	0.593203	16.3081	5.32878	4.7959	0.0603258	1.6489	4.45405	1.11603	4.35351	0.130706	100	5.46954			0.445946	17.6	17.2	0.84		7.1		112	24			11			21.9	375	7.4	67	3.3		583	8.8	18.3		10.8	2.7	0.77	2.65		1.5
Atacazo	Arc Front	ATAC 055	2	67.0854	0.582915	16.0402	5.10553	4.60302	0.0502513	1.55779	4.35176	1.13568	4.47236	0.120603	100	5.60804			0.478261	19.7727	17.6	0.83		6.5		106	21			9			21.5	380	6.9	53	3.3		545	8.7	17.7		12.1	2.9	0.76	2.5		1.35
Atacazo	Arc Front	ATAC 065C	2	66.8477	0.633484	15.8874	5.42986	4.88688	0.0502765	1.53846	4.56511	1.02564	4.42433	0.140774	100	5.44997			0.472222	18.7234	15.2	0.8		6		113	18			8			18.6	396	7.2	68	3.4		498	8.8	19		12	2.8	0.8	2.6		1.5
Atacazo	Arc Front	ATAC 070	2	66.851	0.63342	15.745	5.3891	4.85622	0.0603258	1.55842	4.66519	1.02554	4.46411	0.14076	100	5.48964			0.471429	20	15.7	0.82		6.2		112	20			7.5			19	402	7	68	3.3		520	8.8	19		12	2.8	0.79	2.4		1.45
Atacazo	Arc Front	ATAC 064A	2	66.9046	0.623304	15.9646	5.25787	4.72504	0.0502664	1.47783	4.56419	1.04554	4.50387	0.140746	100	5.54941			0.478261	20.9302	12.9	0.83		5.8		110	19			8			18.6	402	6.9	67	3.3		554	9	19		11.8	2.9	0.8	2.7		1.4
Atacazo	Arc Front	ATAC 107-I	2	67.3769	0.582915	15.6884	4.97487	4.48241	0.0502513	1.46734	4.62312	1.06533	4.52261	0.140704	100	5.58794			0.432836	20.9302	12.4	0.75		5.6		105	18			8			18.6	399	6.7	65	2.9		560	9	18.5		12.1	2.75	0.78	2.45		1.35
Atacazo	Arc Front	ATAC 065A	2	67.0989	0.613189	15.953	5.17692	4.6542	0.0502614	1.47768	4.57378	1.02533	4.423	0.13068	100	5.44833			0.492537	20.4545	15.4	0.83		5.6		105	19			8			19	400	6.7	65	3.3		519	9	19		12.2	2.9	0.8	2.65		1.4
Atacazo	Arc Front	ATAC 065B	2	67.0319	0.603076	16.0418	5.08594	4.58338	0.0502563	1.47754	4.60348	1.02523	4.45271	0.130666	100	5.47794			0.470588	20.4545	15.8	0.83		5.6		103	17			6.7			19	398	6.8	64	3.2		525	9	19		11.8	2.6	0.81	2.55		1.4
Atacazo	Arc Front	ATAC 092	2	63.1039	0.644122	17.0592	6.34058	5.70652	0.0805153	2.32488	5.75684	1.02657	4.1566	0.140902	100	5.18317			0.371134	14.6154	7.5	0.78		9.5		135	32			11			17.4	439	9.7	75	3.6		540	9.5	20		11.7	2.85	0.83	2.95		1.85
Atacazo	Arc Front	ATAC 095	2	62.0672	0.573671	17.2605	6.562	5.90781	0.0905797	2.73752	6.20974	0.976248	4.03583	0.140902	100	5.01208			0.28972	9.28571	11.6	0.72		12.5		147	41			15.5			17.4	429	10.7	77	3.1		526	7.8	17		9.8	2.45	0.78	2.5		2
Atacazo	Arc Front	ATAC 091	2	63.7251	0.623868	16.6834	6.16824	5.55444	0.0804991	2.28416	5.645	1.05655	4.19602	0.150936	100	5.25257			0.393258	14.2857	12.8	0.79		9.5		132	42			13			18.8	439	8.9	75	3.5		540	9	20		11	2.7	0.81	2.6		1.8
Atacazo	Arc Front	ATAC 089	2	64.2555	0.643863	16.3682	6.22736	5.60362	0.0804829	2.17304	5.52314	1.08652	4.11469	0.150905	100	5.20121			0.443182	15	13.4	0.77		8.7		138	37			11			20.6	430	8.8	68	3.9		572	9	19		12	2.8	0.8	2.55		1.9
Atacazo	Arc Front	ATAC 100	2	63.4186	0.624119	16.519	6.57338	5.91907	0.0805315	2.56694	5.70767	1.02678	3.99638	0.14093	100	5.02315			0.314286	10.2532	15.7	0.75		11.7		148	60			16.5			20.6	386	10.5	86	3.3		515	8.1	16		9.7	2.5	0.76	2.35		1.85
Atacazo	Arc Front	ATAC 035	2	63.2723	0.714429	18.062	6.24874	5.61481	0.0704367	1.89173	5.17207	0.945864	4.07527	0.181123	100	5.02113			0.578947	18.5417	15.4	0.87		7		122	13			5			17.5	492	7.6	94	4.4		630	8.9	20		11.5	2.8	0.82	2.7		1.6
Atacazo	Arc Front	ATAC 030B	2	64.1441	0.694375	17.1782	6.24937	5.62544	0.0704438	1.82148	5.31347	0.986213	3.97504	0.191205	100	4.96126			0.55	19.6	15.1	0.89		7		128	16			5			18	448	8	95	4.4		535	9.8	20.8		12.5	2.75	0.85	2.7		1.6
Atacazo	Arc Front	ATAC 003	2	64.3022	0.684173	16.9635	6.17768	5.55388	0.0704296	1.83117	5.20173	1.0162	4.21572	0.160982	100	5.23191			0.5125	18.75	15	0.79	13.4	7		125	14			4			19.2	455	8	88	4.1		550	9	20		11.8	2.9	0.88	3.2		1.6
Atacazo	Arc Front	ATAC 009D	2	64.5444	0.66385	17.1495	5.88413	5.30074	0.0704084	1.78033	5.07946	1.02595	4.2245	0.160933	100	5.25045			0.565789	18.2692	15.4	0.88		6.5		118	13			6			19.4	448	7.6	89	4.3		540	9.5	20		12	2.95	0.82	2.55		1.55
Atacazo	Arc Front	ATAC 038B1	2	64.742	0.673976	16.8595	5.89478	5.30128	0.0603561	1.77045	5.17051	1.05623	4.21487	0.15089	100	5.2711			0.581081	20.2222	15.1	0.86		6.5		120	13			5			19.3	448	7.4	92	4.3		550	9.1	20		11.9	2.8	0.8	2.45		1.6
Atacazo	Arc Front	ATAC 025B2	2	64.9432	0.653858	16.5376	5.82436	5.24092	0.0704155	1.81068	5.24092	1.06629	4.27522	0.16095	100	5.34151			0.5625	19.6	14.75	0.84		7		120	14			6			19.3	458	8	91	4.5		570	9.8	21		12.2	2.8	0.83	2.5		1.6
Atacazo	Arc Front	ATAC 032	2	65.0407	0.643669	17.2181	5.60193	5.03872	0.060344	1.68963	4.97838	1.04596	4.10339	0.181032	100	5.14935			0.594595	21.2766	16	0.89		6.2		108	13			5			19.4	453	7.4	70	4.4		530	10	21.7		12.4	2.8	0.81	2.7		1.5
Atacazo	Arc Front	ATAC 024C	2	66.0768	0.613312	16.2377	5.39916	4.85622	0.0603258	1.74945	4.95677	1.15624	4.16248	0.130706	100	5.31872			0.558442	19	11	0.82		6.7		110	14			5			21.4	439	7.7	68	4.3		630	9.5	19.5		12	2.7	0.8	2.6		1.55
Atacazo	Arc Front	ATAC 024D	2	66.0368	0.603076	16.4841	5.2166	4.70399	0.0603076	1.61825	4.86481	1.16595	4.31199	0.150769	100	5.47794			0.567568	20.625	11.9	0.88		6		100	11			5			20.7	454	7.4	63	4.2		590	9.9	21.5		12.3	2.9	0.82	2.7		1.55
Atacazo	Arc Front	ATAC 024E	2	66.2177	0.603076	16.2529	5.18645	4.67384	0.0603076	1.57805	5.00553	1.16595	4.29189	0.150769	100	5.45783			0.608108	22.6667	12.3	0.87		6		105	12			5.5			21.5	454	7.4	68	4.5		620	10.2	21		12.3	2.8	0.81	2.6		1.5
Atacazo	Arc Front	ATAC 024F	2	65.6476	0.633548	16.3113	5.5712	5.0181	0.0603379	1.68946	5.10861	1.14642	4.25382	0.130732	100	5.40024			0.551282	20.8163	11.8	0.86		6.5		114	13			5			20.7	452	7.8	92	4.3		590	10.2	21.5		12.4	2.8	0.81	2.65		1.55
Atacazo	Arc Front	ATAC 024H	2	66.0565	0.623554	16.132	5.55164	4.99849	0.060344	1.67957	4.98843	1.15659	4.16373	0.140803	100	5.32033			0.571429	20	15.2	0.86		6.5		115	15			5			21.2	444	7.7	71	4.4		610	10	21		12	2.7	0.82	2.65		1.55
Atacazo	Arc Front	ATAC 038D	2	64.6751	0.563267	17.1998	5.68296	5.11969	0.0704084	1.84068	5.25045	1.0863	4.06357	0.130758	100	5.14987			0.426667	16.3265	16.3	0.82		6.5		115	12			5			22.2	437	7.5	73	3.2		570	8	16.5		9.8	2.35	0.68	2.35		1.5
Atacazo	Arc Front	ATAC 033	2	64.7059	0.573152	17.446	5.4902	4.93715	0.0603318	1.7999	5.06787	1.09603	4.18301	0.130719	100	5.27903			0.48	17.2917	16.4	0.82		6.5		108	12			5			21	442	7.5	80	3.6		590	8.3	17.5		10.2	2.6	0.73	2.3		1.55
Atacazo	Arc Front	ATAC 045A	2	64.9497	0.583501	17.0624	5.94567	5.35211	0.0603622	1.6499	4.87928	1.13682	4.19517	0.130785	100	5.33199			0.452055	18.8636	16.4	0.82		6.2		126	15			5			23	435	7.3	76	3.3		620	8.3	17.8		10.7	2.5	0.71	2.45		1.5
Atacazo	Arc Front	ATAC 073A	2	64.9874	0.553042	17.1644	5.47009	4.9271	0.0703871	1.73957	5.07793	1.10608	4.25339	0.120664	100	5.35948			0.405405	20	15.6	0.81		6.1		108	12			5			21.7	448	7.4	74	3		585	8	17		10.1	2.35	0.66	2.3		1.45
Atacazo	Arc Front	ATAC 030A	2	65.001	0.542932	17.1526	5.50975	4.95677	0.0603258	1.74945	5.30867	1.06576	4.02172	0.14076	100	5.08747			0.434211	17.1739	16.2	0.82		7		110	12			5			21.5	443	7.6	80	3.3		635	7.9	18		9.7	2.4	0.69	2.4		1.5
Atacazo	Arc Front	ATAC 053A	2	65.0272	0.563267	17.0791	5.64273	5.07946	0.06035	1.73003	5.03923	1.10642	4.18427	0.130758	100	5.29069			0.472222	18.3333	16	0.8		6.2		119	14			5			23	441	7.2	76	3.4		610	7.7	16.2		9.7	2.35	0.68	2.45		1.4
Atacazo	Arc Front	ATAC 036D	2	65.0412	0.56304	17.4341	5.32878	4.7959	0.0603258	1.67907	4.75568	1.15624	4.39373	0.120652	100	5.54997			0.458333	17.7778	17	0.85		6		102	11			5			22.5	440	7.2	73	3.3		575	8	16.8		9.9	2.5	0.71	2.3		1.45
Atacazo	Arc Front	ATAC 036A	2	65.0779	0.553042	17.2147	5.42986	4.88688	0.0603318	1.7094	5.0176	1.10608	4.25339	0.120664	100	5.35948			0.405405	17.7778	16.2	0.82		6.5		110	11			5			21.6	440	7.4	74	3		575	8	17.2		9.7	2.4	0.7	2.2		1.45
Atacazo	Arc Front	ATAC 036B2	2	65.098	0.553042	17.1543	5.42986	4.88688	0.0603318	1.73957	4.97738	1.12619	4.28356	0.120664	100	5.40975			0.438356	16.9565	16.5	0.82		6.5		105	11			5			22	436	7.3	76	3.2		570	7.8	16.8		9.7	2.6	0.71	2.25		1.45
Atacazo	Arc Front	ATAC 036C	2	65.0447	0.542877	17.3419	5.29808	4.77531	0.0603197	1.70906	4.83563	1.14607	4.42344	0.120639	100	5.56952			0.430556	17.1739	16.4	0.83		6		100	11			5			22	443	7.2	73	3.1		570	7.9	17		9.4	2.55	0.72	2.25		1.45
Atacazo	Arc Front	ATAC 034	2	65.1081	0.553042	17.0538	5.48014	4.9271	0.0703871	1.77979	5.11815	1.1463	4.11262	0.130719	100	5.25892			0.413333	16.5306	16.4	0.81		6.5		108	11			5			22.4	428	7.5	76	3.1		580	8.1	16.5		9.8	2.45	0.73	2.5		1.55
Atacazo	Arc Front	ATAC 057A	2	65.1217	0.542932	17.1627	5.39916	4.85622	0.0603258	1.71928	4.95677	1.14619	4.29318	0.14076	100	5.43937			0.459459	17.3913	16.8	0.82		6.1		110	12.5			5.5			23.3	443	7.4	76	3.4		615	8	16.6		10.1	2.5	0.65	2.35		1.45
Atacazo	Arc Front	ATAC 008A	2	65.1885	0.553042	17.1342	5.44997	4.90699	0.0603318	1.69935	4.98743	1.10608	4.23328	0.130719	100	5.33937			0.472222	16.6667	16.7	0.84		6.5		114	13			8			21.8	440	7.2	76	3.4		620	8	17		9.8	2.4	0.76	2.3		1.35
Atacazo	Arc Front	ATAC 009A	2	65.1217	0.532878	17.2129	5.31872	4.78584	0.0603258	1.68912	5.09753	1.07581	4.29318	0.130706	100	5.36899			0.452055	18.2222	16.2	0.83		6.5		110	12			6			21.2	444	7.3	76	3.3		606	8.2	16.5		10.3	2.2	0.72	2.25		1.45
Atacazo	Arc Front	ATAC 073B	2	65.2589	0.553042	17.0337	5.47009	4.9271	0.0603318	1.64907	5.00754	1.13625	4.25339	0.120664	100	5.38964			0.442857	20.25	16.3	0.78		6		110	11.5			5			23.4	445	7	74	3.1		612	8.1	16.5		9.7	2.2	0.69	2.2		1.4
Atacazo	Arc Front	ATAC 052C1	2	65.4635	0.542932	17.0119	5.28856	4.75568	0.0603258	1.66901	4.94671	1.15624	4.26302	0.130706	100	5.41926			0.452055	17.2727	16.5	0.81		6.3		107	12			5			23	441	7.3	76	3.3		620	7.6	16.5		9.8	2.25	0.69	2.3		1.4
Atacazo	Arc Front	ATAC 039A	2	65.4538	0.542768	17.057	5.12614	4.61353	0.0603076	1.74892	5.12614	1.10564	4.16122	0.130666	100	5.26686			0.418919	18.3721	16.4	0.83		6		110	12			5			22.2	440	7.4	72	3.1		600	7.9	16.5		9.8	2.25	0.7	2.3		1.45
Atacazo	Arc Front	ATAC 021A	2	65.5405	0.542986	16.6918	5.41981	4.87682	0.0703871	1.74962	5.03771	1.10608	4.26345	0.120664	100	5.36953			0.450704	17.9545	15.7	0.78		6		108	12			5			22	440	7.1	74	3.2		600	7.9	16.5		9.7	2.3	0.7	2.25		1.45
Atacazo	Arc Front	ATAC 019B	2	65.5672	0.543041	16.603	5.48069	4.92759	0.0703942	1.68946	5.02816	1.14642	4.3041	0.120676	100	5.45052			0.445946	18.5106	16.4	0.78		6.3		112	13			5			22.3	441	7.4	72	3.3		625	8.7	18		10.4	2.4	0.73	2.2		1.5
Atacazo	Arc Front	ATAC 039B1	2	65.6614	0.522718	17.0587	5.16687	4.6542	0.0603136	1.65862	4.85525	1.16606	4.24206	0.120627	100	5.40812			0.471429	18.6047	16.9	0.81		5.5		102	11			4.5			23.2	436	7	73	3.3		610	8	16.5		9.5	2.5	0.69	2.25		1.3
Atacazo	Arc Front	ATAC 052C2	2	65.6715	0.522718	17.0285	5.15682	4.64415	0.0603136	1.65862	4.92561	1.14596	4.22195	0.120627	100	5.36791			0.464789	18.1395	16.4	0.81		6.1		104	12			4.5			23.9	438	7.1	76	3.3		630	7.8	16.6		9.5	2.35	0.68	2.15		1.35
Atacazo	Arc Front	ATAC 044	2	65.6781	0.532824	16.9197	5.23776	4.71499	0.0603197	1.65879	4.82558	1.17623	4.31286	0.120639	100	5.48909			0.444444	19.3333	17	0.84		6.1		107	14			4.5			24.4	436	7.2	78	3.2		645	8.7	17.6		10.7	2.25	0.7	2.45		1.45
Atacazo	Arc Front	ATAC 073C	2	65.7419	0.53277	16.9883	5.20708	4.68436	0.0603136	1.58826	4.82509	1.16606	4.29232	0.120627	100	5.45838			0.449275	20.2439	17.1	0.81		5.9		102	11			5			23.9	438	6.9	74	3.1		640	8.3	18		10	2.3	0.69	2.3		1.4
Atacazo	Arc Front	ATAC 037D	2	65.7686	0.532824	16.98	5.21765	4.69488	0.0603197	1.62863	4.8859	1.17623	4.15201	0.120639	100	5.32824			0.428571	18	17.3	0.82		6		100	12			4.5			24.3	436	7	74	3		600	8.1	17		9.7	2.45	0.68	2.45		1.4
Atacazo	Arc Front	ATAC 042A1	2	65.849	0.512717	16.7689	5.12717	4.61446	0.0603197	1.66884	5.02664	1.15613	4.22238	0.120639	100	5.37851			0.471429	16.9048	15.7	0.78		5.8		100	10			4.5			22.5	438	7	72	3.3		625	7.1	16		9.2	2.2	0.64	1.75		1.35
Atacazo	Arc Front	ATAC 041C	2	65.9562	0.542932	16.5896	5.2584	4.72552	0.0603258	1.67907	4.89644	1.19646	4.2228	0.130706	100	5.41926			0.444444	18.6047	17	0.81		5.8		102	11			6			24	434	7.2	72	3.2		660	8	16.5		9.7	2.2	0.69	2.15		1.3
Atacazo	Arc Front	ATAC 018A	2	65.963	0.53277	16.546	5.22718	4.70446	0.0603136	1.65862	4.97587	1.18617	4.25211	0.120627	100	5.43828			0.426667	18.5106	17	0.83		6		104	12			5			23.6	440	7.5	76	3.2		665	8.7	18		10.5	2.3	0.7	2.25		1.5
Atacazo	Arc Front	ATAC 022E2	2	66.0133	0.522718	16.6566	5.13671	4.62405	0.0603136	1.69883	4.93567	1.20627	4.16164	0.120627	100	5.36791			0.452055	18	14.6	0.8		6.2		102	12			5			23.9	439	7.3	74	3.3		625	8.1	17		9.5	2.35	0.71	2.4		1.45
Atacazo	Arc Front	ATAC 022E3	2	66.0334	0.522718	16.6164	5.17692	4.66425	0.0603136	1.67873	4.87535	1.17612	4.25211	0.120627	100	5.42823			0.452055	17.7778	15.7	0.81		6.2		105	12			5			23.6	439	7.3	74	3.3		650	8	16.7		10	2.35	0.71	2.35		1.5
Atacazo	Arc Front	ATAC 047A	2	66.0603	0.522613	16.593	5.07538	4.56281	0.0603015	1.63819	4.99497	1.21608	4.23116	0.120603	100	5.44724			0.450704	19.1111	17	0.8		6		101	13			5			24.5	432	7.1	74	3.2		670	8.6	17.7		10.7	2.35	0.63	2.35		1.4
Atacazo	Arc Front	ATAC 023A	2	66.1908	0.532824	16.4673	5.22771	4.70494	0.0603197	1.62863	4.78536	1.2265	4.27265	0.130693	100	5.49915			0.478873	18.8636	12.9	0.82		6		107	12.5			5			24.5	435	7.1	72	3.4		675	8.3	16.7		10	2.35	0.71	2.25		1.4
Atacazo	Arc Front	ATAC 023B	2	66.0603	0.532663	16.5427	5.18593	4.67337	0.0603015	1.68844	4.93467	1.17588	4.21106	0.120603	100	5.38693			0.458333	17.3913	15.3	0.8		6.2		107	12			5			23.4	439	7.2	73	3.3		650	8	16.7		9.6	2.35	0.71	2.2		1.45
Atacazo	Arc Front	ATAC 042B	2	66.1405	0.552931	16.5075	5.24781	4.72504	0.0603197	1.64874	4.83563	1.20639	4.19222	0.130693	100	5.39861			0.428571	18.1395	15.3	0.81		5.9		103	12			4.5			23.6	431	7	72	3		660	7.8	16.5		9.5	2.3	0.65	2.2		1.35
Atacazo	Arc Front	ATAC 023B1	2	66.1641	0.522718	16.4455	5.11661	4.60394	0.0603136	1.67873	4.93567	1.19622	4.26216	0.13068	100	5.45838			0.452055	17.0213	15.8	0.8		6.2		105	12.5			5			24.4	435	7.3	73	3.3		660	8	16.5		9.6	2.4	0.71	2.2		1.45
Atacazo	Arc Front	ATAC 022E1	2	66.345	0.53277	16.536	5.24729	4.72457	0.0603136	1.66868	4.75472	1.21632	4.05107	0.110575	100	5.26739			0.471429	23.1818	14.3	0.77		6		103	12			5			24	430	7	73	3.3		640	10.2	19		10.5	2.4	0.73	2.25		1.45
Atacazo	Arc Front	ATAC 090	2	64.9643	0.522771	16.9197	5.30813	4.78536	0.070373	1.85986	5.36845	1.14607	4.23243	0.130693	100	5.37851			0.358025	15.3704	16.1	0.79		7.2		107	12			6.5			23	447	8.1	65	2.9		615	8.3	17.5		10.3	2.25	0.74	2.4		1.65
Atacazo	Arc Front	ATAC 093	2	64.8804	0.542932	17.0521	5.31872	4.78584	0.0703801	1.77961	5.34888	1.14619	4.25297	0.14076	100	5.39916			0.425	16.1538	16.2	0.79		7		115	12			6.5			22.5	452	8	69	3.4		625	8.4	18		10	2.5	0.75	2.3		1.6
Atacazo	Arc Front	ATAC 094	2	65.0246	0.542877	16.9599	5.3584	4.82558	0.070373	1.75932	5.31819	1.14607	4.21233	0.140746	100	5.3584			0.4125	16.0377	16.4	0.78		7		118	13			6.5			22	453	8	67	3.3		615	8.5	17		10	2.55	0.76	2.25		1.6
Atacazo	Arc Front	8557 AT	3	59.4359	0.670067	15.8516	7.83078	7.83078	0.120012	4.90049	6.71067	0.980098	3.38034	0.120012	100	4.36044			0.261538	15.4167				20		136				60			20	351	13	90	3.4	0.35	406	7.4	14.5		7.4	2.36	0.73		0.25
Atacazo	Arc Front	AT 01	3	60.3087	0.664418	17.4282	7.33926	5.14157	0.11244	4.34427	7.20638	0.909741	3.76163	0.122662	100	4.67137			0.18125	4.6				24		166				38			19	362	16	91	2.9	0.44	384	6.9	12.5		8.9	2.41	0.78		0.44
Atacazo	Arc Front	At-02†	4	58.7205	0.660793	16.2295	0	7.75931	0	4.96596	6.80817	0.871045	3.84461	0.140168	100	4.71566			0.232967	7.98658				23		188				47			21.9	438	18.2	120	4.24	0.73	485	11.9	24.4	3.26	15	3.97	1.14	3.88	0.6	3.49	0.67
Atacazo	Arc Front	957 g†	4	62.6201	0.620496	16.4932	0	6.63531	0	2.69215	5.64452	1.06085	4.10328	0.130104	100	5.16413			0.171341	4.26875				26		135				20			17.2	355	16.4	77	2.81	0.42	387	6.83	13.7	1.89	8.73	2.54	0.84	2.83	0.49	2.99	0.62
Carihuairazo	Arc Front	RIO 117	1	61.8243	0.683585	17.7431	5.76021	5.18271	0.0804218	2.08091	5.37821	2.29202	4.52373	0.211107	100	6.81575			0.410256	16.1856				8.7		118	11		13	10			34.5	666	11.7	123	4.8		628	15.7	30		17	3.7	0.98	3		2.15
Carihuairazo	Arc Front	RIO 28	1	61.9663	0.696931	16.5849	6.09057	5.47995	0.0909041	3.06044	6.26228	1.33326	4.31289	0.21211	100	5.64615			0.338462	11.9658				13.2		144	43		18	32			26	763	13	107	4.4		615	14	29		15.5	3.45	0.99	2.7		2.1
Carihuairazo	Arc Front	RIO 81A	1	61.2943	0.716951	17.2472	6.24051	5.61485	0.0908812	3.11016	5.97796	1.22185	4.50367	0.222154	100	5.72551			0.333333	14.2857				13.8		154	42		18	38			20	795	12	83	4		615	14	29		16	3.35	0.99	3.2		2.15
Carihuairazo	Arc Front	RIO 81B	1	61.2099	0.710563	17.2565	6.2428	5.61692	0.101509	3.16708	6.09054	1.28916	4.34459	0.213169	100	5.63375			0.325203	13.2743				13.5		143	42		23	38			24	795	12.3	105	4		575	15	30		16.9	3.45	1	3.1		2.25
Carihuairazo	Arc Front	RIO 81C	1	61.38	0.72152	17.0218	6.35141	5.71464	0.101623	3.17062	6.03638	1.32109	4.31896	0.213407	100	5.64005			0.330709	13.3333				12.2		148	41		17	36			24.5	785	12.7	106	4.2		560	14.8	30		17	3.4	1.01	3.15		2.3
Carihuairazo	Arc Front	RIO 81D	1	61.7643	0.706454	16.854	6.17643	5.5572	0.0908298	3.11849	6.10578	1.25143	4.32955	0.222028	100	5.58099			0.361538	12.7434				14		147	42		19	38			23.5	770	13	107	4.7		615	14.4	29		16.7	3.35	1.01	3		2.25
Carihuairazo	Arc Front	RIO 82	1	62.2372	0.671185	16.7796	5.94914	5.3527	0.0915253	3.40677	5.71524	1.30169	4.27118	0.172881	100	5.57287			0.322581	11.6522				13		140	74		17	42			26.5	600	12.4	100	4		590	13.4	28		15.5	3.25	0.95	2.95		2.3
Carihuairazo	Arc Front	RIO 83A	1	63.1705	0.656973	17.2835	5.66008	5.09262	0.0909655	2.51671	5.19514	1.30384	4.50785	0.181931	100	5.81169			0.37069	12				10.9		128	34		15	27			30	587	11.6	105	4.3		630	12	26.5		14	3	0.98	2.9		2.05
Carihuairazo	Arc Front	RIO 87A	1	61.5454	0.719888	17.3382	6.20523	5.58312	0.0912534	2.96067	5.59688	1.49047	4.47142	0.202785	100	5.96189			0.385246	13.8095				10.5		137	38		16	36			29.5	604	12.2	116	4.7		662	14.5	30.5		17	3.4	1.02	3.2		2.2
Carihuairazo	Arc Front	RIO 87B	1	61.899	0.697312	17.3317	6.03326	5.42839	0.0909537	2.8802	5.55828	1.46536	4.44662	0.202119	100	5.91199			0.433333	14.2157				10.5		134	38		19	28			29	608	12	132	5.2		685	14.5	31		17	3.35	1.03	3.2		2.2
Carihuairazo	Arc Front	RIO-118	1	61.5199	0.75392	17.491	6.03136	5.42823	0.0904704	2.91516	5.62927	1.43747	4.53357	0.201045	100	5.97105			0.437265	13.8241	14.68			11.51		125.01	25.24	681.84	17.88	27.22	33.33	75.3	29.87	661.13	13.31	130.91	5.82	0.45	673.08	14.93	31.88	4.13	17.21	3.57	1.04	3.06	0.43	2.36	0.45
Casitagua	Arc Front	PUL-2	1	61.6473	0.565942	15.9171	6.82163	6.13441	0.111167	4.39616	6.06367	1.08135	3.94138	0.141486	100	5.02274			0.231572	5.93333	5.89			20.4		140.38	200.61	817.22	22.54	52.51	24.67	69.41	19.16	378.47	14.38	92.57	3.33	0.3	520.14	8.01	16.38	2.25	9.64	2.3	0.69	2.34	0.37	2.32	0.5
Chachimbiro	Arc Front	CHI 219	1	63.1868	0.626731	16.932	6.24676	5.62048	0.0924685	2.80488	5.21933	1.59251	3.78093	0.14384	100	5.37345			0.371429	12.2989				12.8		88	41		18	15			31	515	10.5	60	3.9		650	10.7	21.5		12	2.55	0.81	2.5		1.95
Chachimbiro	Arc Front	CHI 236	1	66.8409	0.421612	16.9159	4.55546	4.09875	0.0822657	1.57333	4.4732	1.46022	4.01045	0.123399	100	5.47067			0.293478	13.2895				10		96	6		9	5			27	638	9.2	70	2.7		850	10.1	19.5		11	2.15	0.67	2.1		1.4
Chachimbiro	Arc Front	CHI 43	1	62.5794	0.580948	17.51	6.24774	5.62136	0.101921	2.80282	5.66679	1.30459	3.66915	0.163073	100	4.97373			0.273438	9.68				16		145	43		16	17			22	510	12.8	72	3.5		690	12.1	24.5		13	2.75	0.9	2.65		2.2
Chachimbiro	Arc Front	CHI 49	1	63.9974	0.599341	16.8628	5.86135	5.27371	0.0812665	2.0723	5.53628	1.62533	3.80937	0.142216	100	5.4347			0.41	12.5556				11.5		133	28		16	11			35	545	10	57.5	4.1		685	11.3	20.5		13.3	2.85	0.85	2.7		1.8
Chachimbiro	Arc Front	CHI 67-1	1	66.1408	0.545173	16.4581	4.75226	4.27582	0.0617177	1.69724	4.73169	1.83096	4.11451	0.144008	100	5.94547			0.596774	28	12.9	0.92	16.5	6		98	12		30	8			33.5	502	6.2	46	3.7		830	11.2	21		11.5	2.3	0.71	2.3		1.2
Chachimbiro	Arc Front	CHI DD	1	62.8816	0.585918	17.2637	6.19399	5.573	0.0941654	2.3646	6.09983	1.53804	3.4632	0.136017	100	5.00123			0.256	8.65385				11.7		132	13		12	6			33	405	12.5	88	3.2		628	9	19		10.5	2.45	0.74	2.8		2.3
Chachimbiro	Arc Front	CHI-33	1	61.9927	0.517451	17.0962	6.89935	6.20942	0.111607	2.73945	6.18912	1.52192	3.46997	0.152192	100	4.99188			0.223494	10.6293	15.69			17.08		215.41	5.03	807.84	17.48	9.36	44.28	65.66	26.05	745.65	13.11	73.74	2.93	1.34	770.05	12.33	24.12	3.11	12.88	2.7	0.81	2.44	0.37	2.13	0.45
Chachimbiro	Arc Front	CHI-40	1	59.0387	0.630017	17.5287	7.47891	6.72696	0.121939	4.06463	6.96067	1.17874	3.60736	0.142262	100	4.7861			0.182583	5.55625	9.69			20.59		174.51	57.93	853.11	23.24	29.82	35.56	70.58	22.82	457.74	16.65	80.13	3.04	0.84	556.03	8.89	17.75	2.46	10.86	2.55	0.82	2.73	0.44	2.73	0.57
Chachimbiro	Arc Front	HUA 2	1	69.1831	0.368977	15.9377	3.30029	2.96941	0.0512467	1.17868	3.68977	1.89613	4.61221	0.112743	100	6.50834			0.625	25				4.7		68	7		7	8			40	520	4.8	58	3		835	8.5	17.5		9	1.85	0.55	1.7		1
Chimborazo	Arc Front	CH 100	1	60.8696	0.750725	17.3478	6.25942	5.63187	0.0913044	3.19565	6.08696	1.38986	4.43333	0.202899	100	5.82319			0.376923	13.7143				12		140	41		20	32			30.5	610	13	120	4.9		585	14.4	30.5		16.5	3.75	1.01	3		2.2
Chimborazo	Arc Front	CH 101	1	61.4519	0.789662	17.4637	6.19581	5.57464	0.0911149	2.72332	5.71999	1.3566	4.60636	0.222725	100	5.96296			0.376923	13.3333				11		137	15		18	24			27.5	592	13	120	4.9		580	14	30.5		17.5	3.8	1.07	3.4		2.3
Chimborazo	Arc Front	CH 102	1	63.3904	0.656111	15.9486	5.65265	5.08593	0.0908462	3.55309	5.26908	1.8573	3.95686	0.191786	100	5.81416			0.428571	14.4				13		128	108		17	49			46	515	14	168	6		780	18	37.5		20	4.05	1	3.7		2.6
Chimborazo	Arc Front	CH 103	1	61.0527	0.730198	16.7337	6.33852	5.70304	0.0912747	3.67127	5.88215	1.79507	4.11751	0.223116	100	5.91258			0.45	16.5094				13		145	91		20	54			41.5	670	12	127	5.4		805	17.5	37		20	3.8	1.03	3.4		2.3
Chimborazo	Arc Front	CH 104	1	61.1961	0.735966	16.8062	6.3414	5.70564	0.0907355	3.5286	5.69617	1.78447	4.23432	0.221798	100	6.01879			0.416667	16.3551				12.8		150	93		20	56			42.5	675	12	133	5		815	17.5	36.5		20	3.95	1.03	3.25		2.3
Chimborazo	Arc Front	CH 105	1	61.8868	0.725708	16.8122	6.09796	5.4866	0.0907135	3.14474	5.69479	1.7034	4.2333	0.221744	100	5.9367			0.392857	14.8305				12		138	55		18	44			40	635	14	143	5.5		740	17.5	36		20	3.95	1.04	3.6		2.4
Chimborazo	Arc Front	CH 106	1	58.5137	0.847439	18.1594	7.3243	6.58999	0.110974	3.30905	6.55757	1.37204	4.28764	0.252214	100	5.65968			0.357143	11.5702				13		175	12		21	25			28.5	725	14	104	5		600	14	31		18	3.95	1.11	3.5		2.55
Chimborazo	Arc Front	CH 107C	1	58.6127	0.872847	18.0152	7.30756	6.57492	0.111643	3.13616	6.67829	1.24837	4.48603	0.263884	100	5.7344			0.392308	13.8182				12.3		162	6		21	22			24	770	13	110	5.1		625	15.2	32		18	4.15	1.17	3.3		2.5
Chimborazo	Arc Front	CH 107E	1	57.572	0.886507	17.5263	7.84609	7.05947	0.122277	4.17779	7.35699	1.05973	4.02494	0.213984	100	5.08468			0.307143	10				17		179	53		24	45			22	630	14	100	4.3		500	12	26		15.5	3.6	1.02	3.45		2.55
Chimborazo	Arc Front	CH 107G	1	58.7075	0.843032	17.6224	7.25211	6.52503	0.111727	3.67684	6.90677	1.17821	4.19485	0.233611	100	5.37306			0.293333	10.9756				16.5		179	27		22	25			24	640	15	108	4.4		550	13.5	30		16	3.65	1.02	3.5		2.65
Chimborazo	Arc Front	CH 107H	1	57.501	0.904168	17.7786	7.67019	6.9012	0.12191	3.85033	7.31462	1.17847	4.17543	0.274298	100	5.35389			0.4	12.5				16.4		192	22		24	30			22.5	740	14	110	5.6		620	15	31		18	4	1.14	3.75		2.65
Chimborazo	Arc Front	CH 107J	1	57.487	0.834325	17.297	7.68189	6.91173	0.122096	4.48704	7.52927	1.11922	3.96813	0.244193	100	5.08735			0.306667	10.96				18		183	86		26	56			21.5	700	15	104	4.6		590	13.7	29		17	3.65	1.03	3.5		2.6
Chimborazo	Arc Front	CH 109	1	62.0698	0.671574	17.522	5.82031	5.23679	0.0915783	2.63542	5.71856	1.4042	4.43646	0.213683	100	5.84066			0.409091	14.3				10.2		130	13		16	22			29	682	11	98	4.5		620	14.3	30		17	3.5	0.99	2.8		2.1
Chimborazo	Arc Front	CH 110	1	62.0344	0.691531	17.2883	5.95937	5.36191	0.0915262	2.71528	5.76615	1.53561	4.30173	0.213561	100	5.83734			0.375	13.8				11		134	14		16	25			29	700	12	98	4.5		618	13.8	29		17	3.7	1	3.1		2.15
Chimborazo	Arc Front	CH 111B	1	60.0096	0.720927	17.1093	6.74219	6.06624	0.111693	3.75694	6.50865	1.19816	4.25449	0.264001	100	5.45265			0.330769	12.931				13.8		145	70		21	55			23.5	690	13	116	4.3		618	15	27		17.5	3.9	1.05	3.2		2.3
Chimborazo	Arc Front	CH 111C	1	59.5249	0.861211	17.1736	6.99101	6.29011	0.101319	3.303	6.55534	1.60084	4.30605	0.283693	100	5.90689			0.384615	23.8095				13.2		172	44		21	38			32	964	13	122	5		935	25	49		26	4.85	1.35	3.75		2.45
Chimborazo	Arc Front	CH 111E	1	58.4142	0.872156	17.2403	7.22064	6.49673	0.101414	4.23909	6.75414	1.32852	4.28979	0.263675	100	5.61831			0.416667	16.6667				13.7		166	110		24	70			25	762	12	117	5		690	17	35		20.5	4.2	1.16	3.4		2.35
Chimborazo	Arc Front	CH 111F	1	60.2894	0.76639	17.5759	6.6114	5.94856	0.102185	3.20862	6.24353	1.31819	4.31222	0.235026	100	5.63042			0.342857	13.6134				13		148	28		19	35			19	650	14	124	4.8		622	16.2	33		19.5	3.85	1.06	3.3		2.55
Chimborazo	Arc Front	CH 111G	1	58.4438	0.811719	17.7564	7.02137	6.31743	0.101465	4.08904	6.74742	1.33934	4.16006	0.233369	100	5.4994			0.361538	12.6957				15		162	82		22	65			28	725	13	113	4.7		675	14.6	31		18	3.7	1.06	3.5		2.45
Chimborazo	Arc Front	CH 111H	1	56.2493	0.942556	17.0775	8.31071	7.4775	0.12162	5.37155	7.75328	1.02364	3.74995	0.233105	100	4.77359			0.328571	11.6129				17.5		195	160		28	85			19.2	650	14	102	4.6		520	14.4	29		17.5	3.6	1.16	3.9		2.75
Chimborazo	Arc Front	CH 111I	1	57.2313	0.947066	17.7193	7.73946	6.96353	0.112019	4.2567	7.07753	1.18129	4.26689	0.244404	100	5.44817			0.357143	12.605				16		178	75		24	48			23	710	14	115	5		585	15	31		18	3.8	1.15	3.55		2.7
Chimborazo	Arc Front	CH 111-I	1	58.3637	0.832317	18.0877	7.18634	6.46587	0.101502	3.72513	6.64838	1.31953	4.22249	0.233455	100	5.54201			0.35	13.8596	13.2	1.09		13.7		162	31		23	43			28	690	14	124	4.9		690	15.8	32		18.6	3.9	1.08	3.65		2.55
Chimborazo	Arc Front	CH 111-II	1	58.526	0.840646	19.5264	7.05505	6.34773	0.117052	3.78823	5.83132	1.28757	3.45836	0.276668	100	4.74593			0.35625	10.8974	15.9	1.34		14		154	80		24	56			32.5	532	16	153	5.7		680	17	55		23.5	5.35	1.27	4.45		3.25
Chimborazo	Arc Front	CH 111-III	1	60.7385	0.785056	17.5605	6.5077	5.85526	0.0929672	3.76	5.52638	1.6011	3.87363	0.206594	100	5.47473			0.323529	18.0833	16.8	1.24		12.3		134	97		20	72			41	565	17	162	5.5		775	21.7	36		22	4.55	1.12	4		2.8
Chimborazo	Arc Front	CH 111-IV	1	60.5573	0.769796	17.3461	6.36365	5.72565	0.0923755	3.89004	5.74781	1.58065	4.05426	0.236071	100	5.63491			0.38	16.8142	15.5	1.22		13		137	110		20	67			38.5	650	15	152	5.7		650	19	37		21	4.1	1.04	3.5		2.45
Chimborazo	Arc Front	CH 111J1	1	59.0114	0.829848	17.5702	7.06908	6.36035	0.112695	3.99556	6.55682	1.2294	4.09802	0.235636	100	5.32742			0.31875	13.3333				14.5		157	67		22	44			25.5	668	16	116	5.1		605	16.4	32.5		20	4.05	1.11	3.95		2.75
Chimborazo	Arc Front	CH 111J2	1	58.7178	0.827295	17.2521	7.26406	6.53579	0.121068	4.00532	6.75961	1.23085	4.2979	0.252224	100	5.52876			0.392857	11.8605				14.8		169	73		23	48			23	700	14	110	5.5		595	15.3	31		18	3.7	1.12	3.5		2.65
Chimborazo	Arc Front	CH 111L1	1	58.771	0.8309	16.2634	7.39704	6.65544	0.111462	4.97527	6.72827	1.43888	3.98224	0.24319	100	5.42112			0.407692	16.3366				16.3		168	166		28	89			31.5	676	13	124	5.3		710	16.5	34		18.5	3.7	1.1	3.6		2.4
Chimborazo	Arc Front	CH 111L2	1	57.9429	0.757093	16.2523	7.52046	6.76648	0.11104	5.34003	7.48008	1.26182	3.88641	0.201892	100	5.14823			0.330769	11.2069				20		180	153		29	82			26	592	13	106	4.3		595	13	26.5		15	3.3	0.94	3.2		2.4
Chimborazo	Arc Front	CH 111M	1	62.2191	0.861022	17.4254	6.04765	5.44134	0.0820021	1.9578	5.38139	1.84505	4.51012	0.276757	100	6.35516			0.413333	16.4228				10.4		140	8		15	11			42.5	640	15	157	6.2		890	20.2	42		22	4.2	1.16	3.7		2.75
Chimborazo	Arc Front	CH 111N	1	58.8615	0.83218	18.7748	6.41387	5.77084	0.0811883	2.61832	7.00249	1.4208	4.40446	0.233416	100	5.82526			0.384615	14.9533				11.5		166	18		19	38			31	750	13	124	5		660	16	32		18	3.7	1.09	3.35		2.4
Chimborazo	Arc Front	CH 111O	1	60.3677	0.779918	16.5099	6.48243	5.83253	0.101288	3.9401	6.48243	1.49906	4.26423	0.222834	100	5.76329			0.364286	13.252				15.2		155	81		21	56			32	624	14	133	5.1		660	16.3	34		19	3.85	1.03	3.5		2.6
Chimborazo	Arc Front	CH 111P	1	56.6549	0.75404	15.1827	7.94799	7.15115	0.122277	7.66268	7.5404	1.24315	3.46451	0.224174	100	4.70766			0.253333	18.8372				20		181	282		34	184			23.5	760	15	107	3.8		595	24.3	48		26	4.8	1.26	3.9		2.8
Chimborazo	Arc Front	CH 111Q1	1	56.3856	0.765416	16.0737	8.18485	7.36426	0.132672	5.81716	8.11341	1.58186	3.51071	0.255139	100	5.09257			0.2625	18.9189				22		193	170		25	48			30.5	1035	16	116	4.2		650	28	56		28.5	5.4	1.4	4.2		2.8
Chimborazo	Arc Front	CH 111Q2	1	56.4528	0.745218	15.7006	8.06468	7.25614	0.13271	5.83924	8.24844	1.70481	3.64442	0.275628	100	5.34923			0.24375	21.1679				22		193	175		27.5	50			32	1030	16	112	3.9		642	29	54		29	5.3	1.42	4		2.85
Chimborazo	Arc Front	CH 111T	1	58.1264	0.836205	17.8458	7.40347	6.66122	0.101976	3.94648	6.93438	1.2645	4.04845	0.234545	100	5.31296			0.376923	13.3621				15		162	47		23	49			26	692	13	109	4.9		620	15.5	32		18	3.8	1.08	3.7		2.6
Chimborazo	Arc Front	CH 111U	1	64.393	0.623158	16.7422	5.03719	4.53218	0.0727018	2.78344	5.14105	1.58905	3.95705	0.166175	100	5.54611			0.509091	19.0217				9.6		104	63		14	37			42	514	11	127	5.6		690	17.5	36		18	3.65	0.87	3.3		2.1
Chimborazo	Arc Front	CH 115	1	61.426	0.720867	17.2602	6.15276	5.5359	0.0913776	3.04592	5.93954	1.44173	4.31505	0.223367	100	5.75679			0.416667	14.4898				11.5		138	41		19	33			31	620	12	127	5		610	14.2	30.5		17	3.7	0.99	3.1		2.2
Chimborazo	Arc Front	CH 117C	1	62.335	0.689232	16.4199	5.95983	5.36232	0.0912219	3.28399	5.9801	1.60145	4.05431	0.182444	100	5.65576			0.425	15.566				13		143	74		18	46			40	560	12	136	5.1		680	16.5	33		18	3.8	0.97	3.1		2.25
Chimborazo	Arc Front	CH 99	1	60.8486	0.726551	16.751	6.35732	5.71995	0.10091	3.73366	6.35732	1.41274	4.1373	0.211911	100	5.55004			0.4	13.3333				15		145	60		20	51			29.5	660	12	115	4.8		630	14	30.5		17	3.7	1.01	3		2.2
Chimborazo	Arc Front	CH DB 01	1	60.3117	0.805499	18.0029	6.45406	5.807	0.0906186	2.87966	6.14193	1.35928	4.3799	0.221512	100	5.73918			0.392308	13.3645				12		145	9		17.5	19			29.5	631	13	118	5.1		587	14.3	30.5		17.5	3.8	1.04	3.8		2.4
Chimborazo	Arc Front	CH DB 10A	1	57.3025	0.831811	18.4847	8.4208	7.57656	0.102693	3.9434	7.22957	0.801003	3.57371	0.154039	100	4.37471			0.3	10.6897	9.5	0.83		15		220	33		25	34			21	650	10	70	3		404	9.3	20		11.2	2.65	0.81	2.45		1.75
Chimborazo	Arc Front	CH DB 10A1	1	60.2593	0.778861	18.2418	6.66131	5.99347	0.102482	2.62353	6.04642	1.27077	4.42721	0.256204	100	5.69799			0.376923	12.7027	13.5	1		11		149	10		17	14			26.5	650	13	116	4.9		610	14.1	31		17	3.8	1.03	3.15		2.25
Chimborazo	Arc Front	CH DB 10F	1	57.3373	0.889189	17.7224	7.93115	7.136	0.122647	4.20065	7.3588	1.12426	3.86337	0.245293	100	4.98763			0.326389	9.92	11	0.94		18		190	54		26	47			21.5	695	14.4	110	4.7		576	12.4	26.5		15.4	3.5	1.06	2.85		2.6
Chimborazo	Arc Front	CH DB 10I	1	58.0518	0.866444	17.757	7.50239	6.75022	0.112128	3.83274	6.93155	1.20283	4.2099	0.285417	100	5.41273			0.376812	13.6937	11.8	0.99		14		180	45		24	43			22	776	13.8	115	5.2		640	15.2	30		17.5	3.9	1.15	3.05		2.5
Chimborazo	Arc Front	CH DB 10K	1	58.77	0.806047	18.2636	7.23402	6.50876	0.112234	3.06094	6.78508	1.16316	4.26491	0.265281	100	5.42806			0.318841	11.3559	13	0.97		12.3		170	20		20	20			21.5	698	13.8	118	4.4		555	13.4	26.5		15	3.45	1.07	2.85		2.4
Chimborazo	Arc Front	CH DB 10N	1	57.9028	0.885333	18.0119	7.42865	6.68388	0.111939	3.70415	6.86896	1.2415	4.31473	0.274758	100	5.55623			0.404412	14.7321	11.7	1.05		14		178	42		23.5	38			23	782	13.6	116	5.5		630	16.5	33.5		19.5	4.05	1.13	3.6		2.5
Chimborazo	Arc Front	CH DB 111V	1	57.9606	0.748871	16.2597	7.67336	6.90406	0.123102	5.21132	7.55026	1.44645	3.54944	0.246204	100	4.99589			0.242775	22.3333	12.6	1.08		22		186	132		26	57			30	872	17.3	125	4.2		800	33.5	63		31.5	5.95	1.48	4.05		2.9
Chimborazo	Arc Front	CH DB 111W	1	58.0036	0.778358	18.2861	7.36774	6.62908	0.117287	4.63816	6.728	1.19419	3.37999	0.245236	100	4.57418			0.382353	16.6667	11.9	1.21		18		162	129		25	60			27	653	13.6	147	5.2		615	21	49		22.3	4.65	1.19	3.3		2.6
Chimborazo	Arc Front	CH DB 12	1	63.5154	0.667519	16.3846	5.51209	4.95946	0.0809114	3.08475	5.25924	1.71937	4.14671	0.182051	100	5.86608			0.456	16.6337	13.3	1.09		12		128	68		17.5	42			42.5	542	12.5	150	5.7		740	16.8	35		18	3.75	0.98	2.75		2.2
Chimborazo	Arc Front	CH DB 123A	1	60.4816	0.820089	17.3756	6.4377	5.79228	0.09226	3.25985	6.25318	1.29164	4.38748	0.246027	100	5.67912			0.366667	13.5922	13.2	0.9		11.5		148	36		20	40			26.5	660	12	105	4.4		580	14	29		16.8	3.7	1.04	3.3		2.35
Chimborazo	Arc Front	CH DB 123B	1	60.0397	0.824274	17.1469	6.61454	5.95139	0.091586	3.48027	6.4619	1.31273	4.44701	0.244229	100	5.75974			0.353846	13.2692	13	0.9		12		156	43		20	44			26.4	668	13	107	4.6		565	13.8	30.5		16.8	3.7	1.04	3.2		2.4
Chimborazo	Arc Front	CH DB 127C1	1	62.0478	0.700703	16.5021	5.9509	5.35428	0.0913961	3.48321	5.99152	1.60451	4.04174	0.182792	100	5.64625			0.384615	14.8148	15.3	1.1		12.8		139	79		19	40			39	560	13	132	5		670	16	34		17.6	3.6	0.96	3.2		2.4
Chimborazo	Arc Front	CH DB 127C2	1	62.1544	0.691735	16.5813	5.84923	5.26281	0.0915532	3.41799	5.95096	1.62761	4.03851	0.183106	100	5.66612			0.423077	14.9533	15.6	1.3		12.5		138	79		19	40			40	558	13	135	5.5		688	16	33		17.5	3.6	0.95	3.2		2.4
Chimborazo	Arc Front	CH DB 129A	1	62.3479	0.714296	16.5309	5.81641	5.23328	0.0816339	3.16331	5.71437	1.77554	4.21435	0.224493	100	5.98989			0.4	17.1429	14.5	1.2		11.2		135	62		19	49			41.5	608	13	145	5.2		725	18	36		19	4	1.06	3.4		2.5
Chimborazo	Arc Front	CH DB 129B	1	61.0463	0.768132	16.626	6.43816	5.79269	0.090963	3.6082	5.96313	1.65755	4.22472	0.222354	100	5.88227			0.415385	15.8879	15.5	1.1		12.5		151	74		21	51			38	620	13	140	5.4		706	17	34.5		19	4	1.08	3.5		2.5
Chimborazo	Arc Front	CH DB 131A	1	60.5108	0.702903	16.2483	6.45856	5.81104	0.10187	4.23779	6.68267	1.64011	3.85068	0.213927	100	5.49079			0.353333	18.4	15	1.04		16		161	111		22	51			36.5	703	15	130	5.3		748	23	44		23	4.55	1.14	3.8		2.65
Chimborazo	Arc Front	CH DB 131A	1	58.7979	0.839247	17.0883	7.28022	6.55033	0.101114	4.1659	6.57242	1.33471	4.31757	0.232562	100	5.65228			0.358333	16.1176	12.3	0.97		12.5		174	96		24	58			29.2	640	12	112	4.3		594	13.7	28		16	3.5	1.05	3.1		2.4
Chimborazo	Arc Front	CH DB 132A	1	60.1305	0.722379	16.2993	6.73542	6.06015	0.101744	4.2834	6.63368	1.60755	3.94765	0.213662	100	5.5552			0.326667	18.1102	13.7	1.07		17		170	106		21	48			36	725	15	130	4.9		753	23	44		22.8	4.4	1.14	3.5		2.5
Chimborazo	Arc Front	CH DB 132B	1	59.959	0.72032	16.2833	6.70608	6.03375	0.101454	4.33207	6.76695	1.62326	3.96683	0.213052	100	5.59009			0.326667	18.3594	13.7	1.06		17		170	109		21	51			36	730	15	130	4.9		730	23.5	45.5		23.2	4.7	1.21	3.75		2.5
Chimborazo	Arc Front	CH DB 137	1	58.5641	0.849052	17.5948	7.48802	6.7373	0.102295	3.58034	6.95609	1.51397	3.82585	0.276198	100	5.33982			0.415385	15.0943	8.3	1.06		12		235	21		22	32			27.2	750	13	111	5.4		680	16	33		18.5	3.8	1.14	3.4		2.35
Chimborazo	Arc Front	CH DB 13XIX	1	60.0926	0.782027	17.4927	6.84274	6.15671	0.102898	3.10753	6.40028	1.43029	4.19825	0.236666	100	5.62854			0.316901	14.958	13	1.01		13.5		162	13		20	26			28	805	14.2	120	4.5		650	17.8	34.5		18.5	3.85	1.1	3		2.5
Chimborazo	Arc Front	CH DB 13XVIII	1	62.1263	0.735161	17.5507	6.11944	5.50592	0.0931894	2.59895	5.74668	1.32536	4.11069	0.207088	100	5.43605			0.333333	13.8679	13.5	1.03		11.5		130	12		16.5	21			31	592	12.9	128	4.3		595	14.7	29		16.5	3.4	0.95	2.7		2.25
Chimborazo	Arc Front	CH DB 13XX	1	60.922	0.72158	17.2148	6.58699	5.9266	0.103083	3.09249	6.14374	1.51532	4.12331	0.237091	100	5.63863			0.3125	17.4797	13.5	1.04		13.5		150	20		18.5	31			30	812	14.4	126	4.5		720	21.5	40.5		21.5	4.25	1.18	3.35		2.5
Chimborazo	Arc Front	CH DB 143	1	60.1506	0.77842	16.5793	6.46998	5.82132	0.0909841	4.02352	6.57108	1.5164	4.24593	0.222406	100	5.76233			0.385714	14.2982	13.8	1.1		15		166	82		22	65			32.4	628	14	132	5.4		705	16.3	33.5		18.3	3.9	1.01	3.5		2.45
Chimborazo	Arc Front	CH DB 144	1	60.0735	0.777422	16.4369	6.59294	5.93195	0.100964	4.22029	6.66362	1.48417	4.08904	0.222121	100	5.57321			0.378571	13.3898	13.1	1.09		15		165	90		22	72			32.3	625	14	132	5.3		690	15.8	32		18	3.8	1.02	3.4		2.45
Chimborazo	Arc Front	CH DB 17	1	60.9686	0.792191	17.4483	6.26734	5.63899	0.0902496	2.82782	6.2172	1.30361	4.50245	0.210582	100	5.80606			0.392308	14.6465				11		144	15		18	24			26.5	624	13	122	5.1		585	14.5	31		17.5	3.65	1.07	3.5		2.35
Chimborazo	Arc Front	CH DB 18	1	60.8815	0.754729	17.1575	6.39004	5.7494	0.0905675	3.1598	6.17872	1.35851	4.44787	0.221387	100	5.80638			0.391667	14.4231				12		142	30		20	31			29.5	652	12	120	4.7		655	15	32		18.5	3.75	1.03	3.5		2.25
Chimborazo	Arc Front	CH DB 20A	1	58.7414	0.849273	16.9349	7.38059	6.64063	0.111214	4.2767	6.85485	1.35479	4.02394	0.212318	100	5.37873			0.378571	13.6842				14.7		190	84		23	71			30	638	14	117	5.3		630	15.6	32.5		18.5	3.8	1.1	3.7		2.6
Chimborazo	Arc Front	CH DB 21	1	60.968	0.748197	17.3905	6.30912	5.67659	0.090997	3.0939	5.9148	1.38518	4.50941	0.222437	100	5.89458			0.445455	13.6082				11.6		143	29		18	30			30	646	11	118	4.9		610	13.2	28.5		16	3.25	1.01	3.1		2.05
Chimborazo	Arc Front	CH DB 26	1	60.7657	0.694177	17.4047	6.84117	6.15529	0.110666	2.68616	6.31802	1.43866	4.18518	0.241453	100	5.62384			0.282353	13.2911				11.8		145	7		15.5	11			25	892	17	110	4.8		632	21	42		23	4.5	1.22	4.1		2.85
Chimborazo	Arc Front	CH DB 32	1	64.2782	0.54748	17.0834	5.01857	4.51542	0.0811082	2.0277	4.98815	1.67286	4.60289	0.20277	100	6.27574			0.427273	19.2771				8		70	14		11	16			39.5	628	11	67	4.7		675	16	32.5		18	3.6	0.92	3.3		2
Chimborazo	Arc Front	CH DB 37	1	67.4012	0.638971	16.2835	4.10178	3.69055	0.0618359	1.93753	4.18423	1.91691	3.74107	0.144284	100	5.65799			0.449275	17.2807	15.2	1.26		10		108	40		10	19			52.5	522	13.8	184	6.2		890	19.7	39.5		20.5	3.9	1	3.1		2.4
Chimborazo	Arc Front	CH DB 41	1	61.2415	0.778151	17.7863	6.02309	5.41924	0.0808469	2.57699	5.91193	1.36429	4.61838	0.222329	100	5.98267			0.385246	14.5833	6.9	1.07		11		146	13		17	22			27.5	625	12.2	130	4.7		590	14	29.5		16.4	3.6	1.06	2.85		2.3
Chimborazo	Arc Front	CH DB 43	1	57.9794	0.860079	18.1628	7.28537	6.55497	0.111304	3.39984	6.93122	1.23447	4.47241	0.293439	100	5.70688			0.398649	12.6562	10.2	1.06		14.5		178	32		21	25			23	765	14.8	125	5.9		650	16.2	33		18.8	4.15	1.19	3.5		2.6
Chimborazo	Arc Front	CH DB 45	1	59.623	0.794303	18.098	6.83704	6.15158	0.100545	2.9158	6.30415	1.25681	4.5044	0.251362	100	5.76121			0.367647	11.3008	11.2	1.02		12		158	7		19	16.5			24	658	13.6	125	5		600	13.9	32		16.8	3.6	1.08	3.2		2.5
Chimborazo	Arc Front	CH DB 48	1	58.0087	0.867609	17.907	7.71768	6.94393	0.110973	3.5007	6.96105	1.27115	4.18672	0.242123	100	5.45786			0.361538	13.0841	9.9	0.95		14		188	22		23.5	36.5			25	698	13	105	4.7		625	14	29		16.6	3.65	1.1	3.6		2.5
Chimborazo	Arc Front	CH DB 55A	1	59.4205	0.677603	18.1181	6.37989	5.74026	0.104247	3.73203	6.44244	1.62625	3.94052	0.198068	100	5.56677			0.378571	14	12.8	1.11		13		132	105		18.5	38			45.5	640	14	130	5.3		810	16.8	34		16.5	3.6	1.02	3.3		2.3
Chimborazo	Arc Front	CH DB 58	1	62.229	0.748772	16.5438	5.96994	5.37141	0.0809483	3.39983	5.5652	1.50766	4.35097	0.202371	100	5.85863			0.418182	17.8261	12.4	1.06		12		142	84		18	45			35.5	568	11	134	4.6		650	16.4	30.5		17.5	3.35	0.94	3.3		2.1
Chimborazo	Arc Front	CH DB 81A	1	63.1036	0.638126	17.4016	5.48991	4.93951	0.0709029	2.24863	5.48991	1.40793	4.48714	0.212709	100	5.89507			0.390909	16.092	10.6	0.95		9.4		200	14		15	17			31.4	636	11	90	4.3		640	14	29		16	3.4	0.96	2.9		2
Chimborazo	Arc Front	CH DB 82A	1	61.3079	0.818113	17.3723	6.3631	5.72515	0.0808012	2.64624	6.00959	1.30292	4.49457	0.242404	100	5.79749			0.384615	13.8	9	0.95		10.5		195	18		18	23			27.2	640	13	108	5		595	13.8	29.5		17	3.7	1.05	3.3		2.35
Chimborazo	Arc Front	CH DB 83A	1	60.3017	0.787861	16.2118	6.82813	6.14356	0.101008	4.28273	6.16148	1.70703	4.06051	0.242419	100	5.76754			0.475	18.5	9.1	1.05		14		160	138		24	67			40.2	660	12	128	5.7		775	18.5	38		20.2	4.1	1.1	3.3		2.4
Chimborazo	Arc Front	CH DB 89	1	59.6436	0.870858	17.8222	7.03775	6.33216	0.101263	3.22015	6.27828	1.15439	4.32391	0.253156	100	5.4783			0.433333	12.9293	9.3	0.98		12.5		156	18		19	27			23.5	648	12	120	5.2		550	12.8	25.5		15.5	3.25	1.07	3		2.25
Chimborazo	Arc Front	CH DB 90	1	61.8568	0.671472	17.6516	5.97203	5.3733	0.0915644	2.74693	5.68717	1.30225	4.40526	0.21365	100	5.70751			0.353846	13.1579	13.3	1.04		12		139	18		17	23			28.5	635	13	106	4.6		657	15	28.5		16	3.2	0.93	3.05		2.2
Chimborazo	Arc Front	CH DB 91	1	64.6155	0.697726	16.887	4.91441	4.42171	0.0606718	1.92127	4.48971	2.05273	4.63128	0.222463	100	6.68401			0.508772	23.5714	15.4	1.27		7.2		105	18		13	18			52	608	11.4	165	5.8		840	19.8	40		20	4.05	1.01	3.1		2.1
Chimborazo	Arc Front	CH DB 92	1	60.0069	0.726133	17.2457	6.58563	5.92537	0.100852	3.69118	6.44443	1.3615	4.26603	0.231959	100	5.62753			0.366667	12.9524	11.3	1.04		15		164	48		22	56			28	681	12	122	4.4		640	13.6	28.5		16	3.55	0.99	2.75		2.15
Chimborazo	Arc Front	CH-DB-13B	1	56.4811	0.751727	15.9894	8.00488	7.20233	0.13206	5.71922	8.12678	1.68631	3.63673	0.274279	100	5.32304			0.259036	19.7279	10.6	1.02		23		200	170		28	58			32.5	1050	16.6	120	4.3		655	29	57.5		29	5.5	1.44	3.95		2.8
Chimborazo	Arc Front	CH-DB-13C	1	56.145	0.782473	16.31	7.94667	7.14996	0.121944	5.53828	8.00764	1.96126	3.67864	0.304859	100	5.6399			0.252941	27.7027	10.5	1.1		21		195	152		25	48			34	1288	17	125	4.3		800	41	78		39	6.9	1.75	4.6		3.1
Chimborazo	Arc Front	CH-DB-13G	1	60.6389	0.899477	18.0906	6.3873	5.74693	0.0808519	2.16279	5.7607	1.73832	4.61866	0.262769	100	6.35698			0.41958	15.9322	15.8	1.2		10.5		170	4.5		17	19			38.5	705	14.3	152	6		772	18.8	36.5		19.7	4.15	1.18	3.3		2.6
Chimborazo	Arc Front	CH-DB-13H	1	58.8792	0.826729	16.2724	7.38006	6.64016	0.100821	5.12168	6.62391	1.45182	3.85135	0.231887	100	5.30316			0.401575	16.1538	12.7	1.03		16.5		167	174		26	87			32.5	680	12.7	132	5.1		680	16.8	32.5		17.8	3.65	1.11	3		2.3
Chimborazo	Arc Front	CH-DB-13K	1	57.6719	0.995044	18.6825	7.5136	6.76031	0.101535	2.99529	6.54901	1.54333	4.37616	0.324912	100	5.9195			0.462069	17.1053	13.4	1.2		10.5		182	18		22	31			29.5	850	14.5	145	6.7		730	19.5	39		22	4.65	1.29	3.8		2.75
Chimborazo	Arc Front	CH-DB-13L	1	56.4548	1.02369	18.4466	7.95638	7.1587	0.111491	3.77041	7.05432	1.27707	4.41908	0.283794	100	5.69616			0.373239	13.1624	11.4	1.03		14		200	24		23.5	31			22	783	14.2	125	5.3		600	15.4	32		19	4.05	1.2	3.35		2.6
Chimborazo	Arc Front	CH-DB-13N	1	58.628	0.799933	17.639	6.8855	6.19518	0.101257	4.05029	6.68299	1.40748	4.26293	0.232892	100	5.67041			0.381679	13.7615	13.4	1.01		14.5		163	82		23	63			29	730	13.1	122	5		685	15	29.5		16.8	3.65	1.06	3.05		2.4
Chimborazo	Arc Front	CH-DB-13P	1	58.2773	0.891896	17.4731	7.21625	6.49277	0.101352	4.25678	6.64868	1.36825	4.21624	0.27365	100	5.58449			0.408	16.9697	13	1.05		13.5		168	107		24	70			26	771	12.5	125	5.1		675	16.8	33.5		19	4.2	1.15	3.1		2.3
Chimborazo	Arc Front	CH-DB-13S	1	57.5699	0.888798	17.4326	7.35278	6.61562	0.101	4.59549	7.13058	1.1615	4.25209	0.252499	100	5.41359			0.341085	13.271	11.4	0.93		15		170	99		25	49			20	753	12.9	112	4.4		530	14.2	28.5		17.1	3.85	1.16	3.05		2.35
Chimborazo	Arc Front	CH-DB-13X	1	60.4286	0.815226	17.7312	6.68485	6.01465	0.101903	2.90424	6.18553	1.30436	4.29013	0.224187	100	5.59449			0.338129	13.1579	13.2	1.01		12.2		149	13		18	19			27	610	13.9	128	4.7		570	15	30		17.3	3.85	1.07	3.15		2.45
Chimborazo	Arc Front	CH-DB-13XI	1	60.2992	0.846842	17.447	7.0094	6.30666	0.102029	3.00986	6.22378	1.27536	4.26482	0.224464	100	5.54018			0.350365	12.9464	13.2	0.99		12.5		160	17		19	22			26	597	13.7	125	4.8		560	14.5	28		16.2	3.8	1.08	3.2		2.5
Chimborazo	Arc Front	CH-DB-13XII	1	60.2945	0.841083	17.4297	6.85027	6.16348	0.101335	2.95899	6.26252	1.30723	4.41822	0.222938	100	5.72545			0.355072	12.7193	13.5	1.03		12.2		156	21		19	21			27	600	13.8	128	4.9		575	14.5	28		17.2	3.7	1.12	3.05		2.6
Chimborazo	Arc Front	CH-DB-13XIV	1	60.1614	0.892783	17.3281	7.10168	6.38969	0.101453	3.06387	6.3205	1.24787	4.26101	0.233341	100	5.50888			0.360294	13.271	13	1.01		12.2		160	19		20	27			26	600	13.6	130	4.9		568	14.2	29		17.2	3.65	1.1	3.3		2.55
Chimborazo	Arc Front	CH-DB-13XV	1	60.9287	0.815782	17.5903	6.3529	5.71598	0.0917755	2.73287	6.13876	1.31545	4.44601	0.22434	100	5.76146			0.37594	12.963	13.8	1.04		12		145	17		18	26			27.5	602	13.3	135	5		576	14	28		16.8	3.7	1.05	3.05		2.5
Chimborazo	Arc Front	CH-DB-13XVI	1	59.6814	0.82947	17.8033	6.87854	6.18892	0.101155	3.02453	6.45368	1.21386	4.47105	0.232656	100	5.68491			0.345865	12.4528	12.3	1.01		12		167	13		21	26			25	662	13.3	120	4.6		570	13.2	26		16	3.55	1.06	3		2.4
Chimborazo	Arc Front	CHIM 013C DB	1	56.1492	0.786291	16.3105	7.94355	7.14716	0.120968	5.53428	8.00403	1.96573	3.67944	0.302419	100	5.64516			0.252941	27.7027	10.5	1.1		21		195	152			48			34	1288	17	125	4.3		800	41	78		39	6.9	1.75	4.6		3.1
Chimborazo	Arc Front	CHIM 057 DB	1	64.1048	0.653413	16.7073	5.23736	4.71228	0.0804201	2.40255	4.97599	1.84966	4.31253	0.20105	100	6.16219			0.423077	15.7143	17.5	1.2		10		117	31			26.5			46.5	575	13	160	5.5		815	17.6	37		19.5	3.85	0.99	3.15		2.25
Chimborazo	Arc Front	CHIM 091 DB	1	64.6233	0.693469	16.8845	4.91459	4.42187	0.0603017	1.9196	4.49247	2.05026	4.63318	0.221106	100	6.68343			0.508772	23.5714	15.4	1.27		7.2		105	18			18			52	608	11.4	165	5.8		840	19.8	40		20	4.05	1.01	3.1		2.1
Chimborazo	Arc Front	CHIM 111A	1	68.817	0.381369	16.0978	3.49253	3.14238	0.0802881	1.19429	3.43232	1.9771	4.67678	0.20072	100	6.65388			0.508621	17.8182				4.7		41	13			7			40	545	11.6	147	5.9		880	19.6	38		19	3.5	0.85	2.75		2.05
Chimborazo	Arc Front	CHIM 111P	1	56.6582	0.75598	15.1801	7.95291	7.15558	0.120957	7.6606	7.53964	1.23981	3.46743	0.221754	100	4.70724			0.253333	18.8372				20		181	282			184			23.5	760	15	106.5	3.8		595	24.3	48		26	4.8	1.26	3.9		2.8
Chimborazo	Arc Front	RIO 61	1	63.2826	0.673005	16.2224	5.87624	5.28711	0.0904037	3.16413	5.1731	1.8583	4.06816	0.180807	100	5.92646			0.421429	16.0345				11.8		129	67		16	43			47	560	14	154	5.9		785	18.6	37.5		20	4.05	1	3.6		2.45
Chimborazo	Arc Front	RIO 62	1	60.8298	0.759107	16.8016	6.55868	5.90113	0.0910928	3.69432	5.84006	1.7004	4.17003	0.21255	100	5.87043			0.433333	16.7347				12.5		149	84		19	50			40	648	12	128	5.2		740	16.4	34		18.5	3.9	1.03	3.4		2.25
Chimborazo	Arc Front	RIO 63	1	62.0157	0.70587	16.6888	6.05031	5.44373	0.0907547	3.37809	5.69738	1.64367	4.13438	0.201677	100	5.77805			0.378571	14.188				13		142	68		18	46			41.5	590	14	145	5.3		736	16.6	34		18.7	3.85	1.01	3.5		2.4
Chimborazo	Arc Front	RIO 65	1	61.8714	0.716618	16.6538	6.17705	5.55776	0.090839	3.35095	5.53108	1.74613	4.27952	0.201864	100	6.02565			0.385714	14.4828				13.3		140	65		17	45			41.5	588	14	144	5.4		705	16.8	35		19	3.95	1.02	3.45		2.4
Chimborazo	Arc Front	RIO 73A	1	63.9199	0.566379	16.9914	5.20867	4.68646	0.0910252	2.14415	4.75354	1.8205	4.80411	0.222506	100	6.62461			0.483333	18.2569				8		100	27		12	22			33	740	12	135	5.8		800	19.9	40		20	3.7	1	3.2		2.1
Chimborazo	Arc Front	RIO 73B	1	64.2966	0.552549	16.9783	5.12364	4.60996	0.0904171	2.0595	4.6615	1.75811	4.77201	0.22102	100	6.53012			0.458333	18.8073				7.5		95	24		9.5	22			34.5	740	12	140	5.5		820	20.5	41		20.5	3.7	1	3		2.1
Chimborazo	Arc Front	RIO 74	1	60.6623	0.638017	17.5708	6.12699	5.51272	0.0911453	3.31161	6.01559	1.41782	4.55726	0.2228	100	5.97508			0.409091	18.6047				12.2		125	30		19.5	50			27.5	762	11	90	4.5		680	16	32.5		18	3.7	1.07	3.15		2.05
Chimborazo	Arc Front	RIO 75A	1	58.4384	0.936643	18.2238	7.27934	6.54954	0.101809	2.983	6.10854	1.55768	4.78502	0.315608	100	6.3427			0.484615	18.2				9		166	19		20	28			27.5	835	13	132	6.3		690	18.2	38		22	4.3	1.27	3.7		2.4
Chimborazo	Arc Front	RIO 75B	1	60.7089	0.743582	17.4182	6.36629	5.72802	0.0916745	3.066	6.11164	1.42605	4.48187	0.224093	100	5.90791			0.441667	14.4231				13.5		210	22		19	40			27	810	12	100	5.3		675	15	31		17.5	3.6	1	3.3		2.15
Chimborazo	Arc Front	RIO 76	1	60.9816	0.759737	17.7272	6.38179	5.74197	0.0911684	2.73505	5.8753	1.39792	4.45712	0.232986	100	5.85504			0.361538	13.8739				11.5		146	11		15	19			29	690	13	120	4.7		615	15.4	33		18.5	3.7	1.06	3.35		2.45
Chimborazo	Arc Front	RIO 77	1	57.2638	0.889633	18.0994	7.61813	6.85436	0.112482	4.12095	6.74894	1.32934	4.29478	0.286319	100	5.62412			0.392308	15.7407				14.3		184	35		26	45			23.5	855	13	112	5.1		695	17	35		20.5	4.2	1.22	3.6		2.4
Chimborazo	Arc Front	RIO 84	1	57.8162	0.879372	18.8004	7.11584	6.40243	0.101077	3.08286	6.57002	1.37465	4.67988	0.293124	100	6.05453			0.357143	14.1026				11.8		179	13		19	22			26	827	14	104	5		681	16.5	34		19	3.7	1.19	3.5		2.5
Chimborazo	Arc Front	RIO 85A	1	60.19	0.852607	17.986	6.56711	5.90871	0.0913508	2.87247	6.19155	1.31951	4.36454	0.223302	100	5.68405			0.441667	15.4639				12.1		154	11		18	23			28	650	12	126	5.3		600	15	31		17.5	3.7	1.09	3.45		2.2
Chimborazo	Arc Front	RIO 86A	1	58.4991	0.832799	18.0778	7.56629	6.80772	0.111717	3.28042	6.72333	1.19842	4.23509	0.23359	100	5.43351			0.3	11.3821				12		184	9		18	18			20.5	710	14	97	4.2		508	14	29		17	3.45	1.13	3.35		2.55
Chimborazo	Arc Front	RIO 86B	1	58.4777	0.829615	17.7558	7.75994	6.98195	0.11129	3.41963	6.87973	1.15337	4.14807	0.242814	100	5.30144			0.315385	11.04				12.8		186	11		20	21			20.5	698	13	104	4.1		525	13.8	28.5		17	3.55	1.1	3.5		2.55
Chimborazo	Arc Front	RIO 86C	1	58.5174	0.821475	18.2043	7.45413	6.7068	0.111558	3.22505	6.66308	1.19672	4.31021	0.2434	100	5.50693			0.28	10.6154				13.7		191	8.5		20	19			20	705	15	104	4.2		525	13.8	28.5		17.2	3.75	1.13	3.6		2.65
Chimborazo	Arc Front	RIO 88	1	58.5941	0.838502	17.8813	7.59703	6.83538	0.111127	3.3439	6.82924	1.16178	4.1622	0.242458	100	5.32398			0.285714	11.2195				12.3		180	10		19	19			20.5	700	14	93	4		530	13.8	28.5		17.2	3.45	1.1	3.45		2.45
Corazon/Cerro Bombo	Arc Front	BOM1	1	62.6196	0.59398	17.316	5.9398	5.34582	0.100675	2.55713	5.23508	1.48998	4.53035	0.211416	100	6.02034			0.463968	15.7788	20.4			9.93		107.41	46.9	717.85	14.67	17.64	20.83	74.04	29.79	621.96	12.35	130.02	5.73	0.83	657.07	16.41	33.22	4.17	16.48	3.28	0.99	2.83	0.39	2.2	0.41
Cotacachi	Arc Front	CHI 91	1	60.6484	0.638938	15.9734	7.27172	6.54268	0.111561	4.71597	6.72406	1.01419	3.49894	0.131844	100	4.51313			0.222222	6.77966				21		175	154		23	45			16.5	445	12.6	82	2.8		560	8	16.2		10	2.3	0.76	2.55		2.25
Cotacachi	Arc Front	CHI-15	1	66.4956	0.543869	15.7311	4.80246	4.32016	0.12314	1.95998	3.98153	2.01129	4.66906	0.164187	100	6.68035			0.431689	12.2759	11.87			10.91		72.48	77.01	886.02	12.9	45.64	31.54	52.71	35.69	442.68	10.54	90.54	4.55	0.77	763.42	10.68	21.61	2.86	11.99	2.5	0.75	2.27	0.32	1.75	0.35
Cotacachi	Arc Front	CUI 28	1	60.4654	0.609018	16.2709	6.99356	6.29241	0.111653	4.84169	6.5977	1.09623	3.58306	0.131954	100	4.67929			0.262111	6.55085				19.76		166.09	244.22		23.69	59.25			19.87	438.22	11.56	79.04	3.03		516.34	7.73	15.13		9.01	2.26	0.7	2.29		2.03
Cotacachi	Arc Front	CUI 3	1	60.5217	0.64449	16.8172	6.79736	6.11588	0.110772	3.82666	6.90813	1.25877	3.62526	0.171193	100	4.88403			0.246575	8.46154				18.5		165	125		23	40			25	475	14.6	93	3.6		600	11	22		13	2.3	0.75	2.5		2.2
Cotacachi	Arc Front	CUI 30	1	60.0501	0.592029	16.832	7.24725	6.52067	0.122489	4.2769	6.84916	1.28613	3.35823	0.112281	100	4.64437			0.226428	5.13665				22.62		175.81	118.02		23.34	32.39			23.95	403.36	15.06	80.57	3.41		557.42	8.27	16.21		9.21	2.15	0.68	2.4		2.43
Cotacachi	Arc Front	CUI 4	1	59.3035	0.606686	15.8749	7.7858	7.00522	0.121337	5.05571	7.4319	1.16281	3.28621	0.151671	100	4.44903			0.178082	6.01504				23		185	225		27	65			22.5	410	14.6	78	2.6		520	8	16.5		10.5		0.7			2.2
Cotacachi	Arc Front	CUI 7	1	60.1575	0.621627	16.9444	6.91811	6.22452	0.110289	3.83003	7.2189	1.2232	3.50919	0.16042	100	4.73239			0.2	6.57143				20		175	96		23	35			24	450	16	90	3.2		590	9.2	19		11		0.75			2.5
Cotacachi	Arc Front	CUI 9	1	62.2135	0.593947	16.9124	6.27168	5.6429	0.100669	3.05027	6.34215	1.25836	3.72475	0.16107	100	4.98312			0.207692	8.23009				15		155	82		19	29			24.5	480	13	89	2.7		590	9.3	18.5		11		0.7			2
Cotacachi	Arc Front	MM 2	1	59.6875	0.606992	16.2876	7.48623	6.73569	0.121398	4.93687	7.03099	1.03189	3.41939	0.141631	100	4.45127			0.2	5.85185				23		182	215		25	55			20.3	440	14	72	2.8		550	7.9	14.5		9.7	2.45	0.77	2.55		2.35
Cotacachi	Arc Front	MM-1B	1	55.1748	0.665121	15.3179	9.06984	8.16285	0.151164	7.93107	8.8179	0.775975	2.87212	0.131009	100	3.64809			0.146574	4.0596	10.67			31.86		209.45	370.3	1091.64	35.43	110.29	52.57	79.5	15.91	389.11	15.76	66.58	2.31	0.53	399.2	6.13	13.2	1.9	8.86	2.36	0.78	2.55	0.42	2.59	0.55
Cotacachi	Arc Front	COTA MM 1B	5	55.171	0.665927	15.3163	9.07073	8.16265	0.151347	7.93058	8.81848	0.776915	2.87559	0.131167	100	3.65251			0.16129	4.32432	8.1	0.93	8.9	30.5		222	330			120			16	384	15.5	60	2.5		411	6.4	12		8.5	2.3	0.76	2.7		2.5
Cuicocha	Arc Front	CUI 12	1	62.5713	0.582772	17.0742	6.23668	5.61141	0.102241	2.79117	6.18556	1.16554	3.76246	0.153361	100	4.928			0.207143	7.34513				13.8		135	50		15	11			21	450	14	85	2.9		560	8.3	18		11		0.75			2.2
Cuicocha	Arc Front	CUI 13A	1	62.1713	0.5793	17.4307	6.20678	5.58451	0.103446	2.82409	5.94817	1.22067	3.98268	0.15517	100	5.20335			0.207407	7.26087				13.5		135	60		15	12			21	455	13.5	82	2.8		590	8.35	19		11.5		0.75			2.3
Cuicocha	Arc Front	CUI 13C	1	62.3222	0.592572	17.062	6.33439	5.69932	0.102168	2.86069	6.18114	1.23623	3.7802	0.163468	100	5.01643			0.197183	8.14159				14		140	58		16.5	14			21.5	465	14.2	87	2.8		610	9.2	19		12		0.75			2.4
Cuicocha	Arc Front	CUI 15	1	63.0443	0.584313	17.1706	6.13016	5.51557	0.102511	2.59353	5.79187	1.30189	3.74165	0.153767	100	5.04354			0.207407	7.52174				12.5		130	30		14	10			22.5	440	13.5	82	2.8		600	8.65	19		12		0.75			2.4
Cuicocha	Arc Front	CUI 17A	1	62.1651	0.585688	17.2213	6.23706	5.61176	0.102752	2.87706	6.10349	1.2022	4.00734	0.123303	100	5.20954			0.327815	6.51282				14.79		134.05	51.12		14.97	11.67			19.99	439.95	12.08	79.92	3.96		528.63	7.62	17.07		9.12	2.5	0.72	2.2		2.2
Cuicocha	Arc Front	CUI 17B	1	62.4575	0.585507	17.3128	6.14782	5.53146	0.100949	2.63478	5.9964	1.21139	4.03798	0.131234	100	5.24937			0.164308	6.90083				13.96		130.59	27.8		14.44	12.74			21.81	441.23	12.72	53.07	2.09		588.89	8.35	16.12		10.15	2.12	0.78	2.31		2.26
Cuicocha	Arc Front	CUI 17C	1	63.0015	0.533202	17.3343	5.85477	5.26779	0.0940945	2.51964	5.86522	1.26505	3.99379	0.125459	100	5.25883			0.231089	6.79487				13.14		119.29	24.29		13.84	10.11			18.12	430.6	12.03	81.37	2.78		557.78	7.95	18.78		9.78	2.73	0.83	2.38		2.05
Cuicocha	Arc Front	CUI 18	1	62.6635	0.566724	17.4673	6.02145	5.41776	0.101201	2.48954	5.92025	1.21441	4.03791	0.121441	100	5.25232			0.116129	7.07759				13.2		128.9	22.4		15.1	9.45			22.49	447.5	12.4	60.39	1.44		595.02	8.21	16.38		9.6	2.59	0.78	2.45		2.22
Cuicocha	Arc Front	CUI 19	1	62.7096	0.588346	17.2852	6.15735	5.54003	0.0912951	2.47511	5.95447	1.19698	4.03727	0.121727	100	5.23425			0.236971	6.38655				13.04		131.52	24.58		14.8	10.5			20.91	447.78	12.28	74.37	2.91		549.04	7.6	17.87		10.31	2.21	0.89	2.56		2.11
Cuicocha	Arc Front	CUI 2	1	63.2132	0.562789	17.2354	5.86908	5.28067	0.0904482	2.2813	5.98968	1.22608	3.96967	0.150747	100	5.19574			0.230159	8.5				12.5		130	20		14	8			21.5	470	12.6	53	2.9		600	8.5	17		11		0.75			2.1
Cuicocha	Arc Front	CUI 24A	1	62.4521	0.565317	17.4632	6.04376	5.43783	0.0925065	2.64157	5.99236	1.22314	4.00861	0.123342	100	5.23175			0.283751	7.33621				13.46		121.89	32.47		13.64	9.1			23.44	446	12.37	81.15	3.51		552.54	8.51	19.02		10.59	1.99	0.83	2.81		1.99
Cuicocha	Arc Front	CUI 24B	1	62.5887	0.569728	17.4784	5.9618	5.36409	0.0915635	2.5536	5.95162	1.25137	4.01862	0.132258	100	5.26999			0.187599	7.0431				13.49		125.3	25.46		12.94	9.2			23.36	450.75	12.58	83.21	2.36		562.95	8.17	17.84		9.94	2.6	0.86	2.46		2.2
Cuicocha	Arc Front	CUI 24C	1	62.5994	0.548672	17.334	5.98459	5.38459	0.0914453	2.65191	6.03539	1.19895	4.02359	0.132088	100	5.22254			0.283607	6.36585				13.7		125.39	32.7		13.33	10.53			25.99	442.05	12.2	80.92	3.46		564.12	7.83	16.56		10.07	1.97	0.84	2.42		2.1
Cuicocha	Arc Front	CUI 26	1	58.4968	0.73829	18.2044	7.29188	6.56082	0.101136	3.59031	6.97836	1.08215	4.09599	0.151703	100	5.17814			0.408805	6.57692				16.96		183.37	48.12		22.2	33.5			13.59	512.58	12.72	84.52	5.2		528.36	8.55	18.9		10.91	2.23	0.91	2.73		2.1
Cuicocha	Arc Front	CUI 31B	1	62.7772	0.570239	17.3719	6.0486	5.44219	0.0916455	2.44388	5.90604	1.27285	4.00185	0.122194	100	5.27471			0.163035	6.78947				12.78		127.39	19.24		13.42	9.4			19.49	445.04	12.39	79.97	2.02		590.21	7.74	17.74		9.7	2.62	0.72	2.42		2.12
Cuicocha	Arc Front	CUI 32	1	62.0816	0.587971	17.1322	6.42713	5.78276	0.101374	2.94999	6.17369	1.1658	3.89277	0.131787	100	5.05858			0.171021	6.74576				15.02		136.72	49.18		16.25	16.23			21.04	433.38	12.63	73.16	2.16		558.12	7.96	17.01		9.46	2.78	0.87	2.45		2.01
Cuicocha	Arc Front	CUI 33	1	61.8683	0.580493	17.2824	6.37524	5.73608	0.101841	2.92283	6.23266	1.18135	3.97179	0.122209	100	5.15315			0.341017	6.60169				15.02		138.2	47.08		16.14	19.28			20.1	438.57	12.58	79.96	4.29		571.38	7.79	15.73		10.32	2.5	0.85	2.37		2.25
Cuicocha	Arc Front	CUI 34	1	60.1578	0.613646	16.5582	7.17966	6.45985	0.112502	4.47962	6.78079	1.11479	3.58983	0.132957	100	4.70462			0.242028	5.71654				21.28		171.42	188.25		20.84	48.99			21.82	431.18	12.23	79.58	2.96		538.7	7.26	16.83		8.98	2.59	0.7	2.21		2.1
Cuicocha	Arc Front	CUI 5	1	62.5905	0.570825	16.8243	6.23902	5.61352	0.100145	2.87416	6.40927	1.15167	3.70536	0.160232	100	4.85702			0.192857	7				14.5		139	46		17	16			21.5	450	14	82	2.7		600	8.4	18		11.5	2.5	0.75	2.6		2.2
Cuicocha	Arc Front	CUI-13A	1																0.241586	6.76724	18.38			14.23		124.54	55.19	695.42	13.59	12.74	8.92	69.53	21.72	452.31	13.37	85.09	3.23	0.93	580.85	7.85	16.78	2.31	10.21	2.47	0.77	2.52	0.38	2.24	0.46
Cuicocha	Arc Front	CUI-5	1	62.5876	0.570799	16.8236	6.23873	5.61787	0.10014	2.87402	6.40897	1.15161	3.70519	0.160224	100	4.8568			0.220209	6.58871	18.06			14.54		131.4	41.2	756.54	15.32	14.65	13.81	80.42	22.14	464.74	14.35	83.06	3.16	0.86	596.32	8.17	17.44	2.41	10.58	2.6	0.83	2.62	0.4	2.43	0.48
Iliniza	Arc Front	SIL-07B	1	65.6179	0.507141	16.4045	5.01966	4.51252	0.0827986	2.12171	4.81267	1.46968	4.32623	0.144898	100	5.7959			0.412574	13.9036	21.88			9.4		92.38	31.55	565.09	20.01	11.66	10.91	71.01	29.83	437.55	10.18	85.82	4.2	1.61	597.61	11.54	23.64	3.05	12.21	2.66	0.77	2.26	0.32	1.75	0.34
Iliniza	Arc Front	SIL-25	1	69.2355	0.366002	16.1651	3.59902	3.24319	0.0610004	1.00651	3.83286	1.47418	4.47336	0.142334	100	5.94754			0.558077	20.5082	31.03			4.43		50.56	2.23	455.39	5.41	2.09	5.54	69.46	30.65	462.91	7.49	50.08	4.18	0.44	715.14	12.51	25.55	3.38	13.43	2.7	0.76	2.02	0.27	1.34	0.25
Iliniza	Arc Front	SIL-37A	1	60.6552	0.608581	15.8738	6.69439	6.02495	0.10143	4.51364	6.44082	1.6736	3.90506	0.20286	100	5.57866			0.372786	18.949	20.42			15.74		142.85	120.84	751.42	24.14	74.5	22.87	74.82	33.31	643.48	12.42	91.9	4.63	1.55	660.51	18.57	37.58	4.77	19.38	3.8	1.05	3.06	0.42	2.21	0.42
Iliniza	Arc Front	ILI 58B	6	56.0284	0.840932	17.1226	8.91591	8.02432	0.131712	5.6231	7.59878	0.8308	3.62715	0.172239	100	4.45795			0.188172	7.31707				23.5		212	202		30	67			14	454	18.6	90	3.5		392	12	24		16	4	1.14	3.7		3.25
Iliniza	Arc Front	ILI 58A	6	56.2709	0.912501	17.9966	8.51668	7.66501	0.121667	4.18737	7.60418	1.02403	3.99473	0.223056	100	5.01876			0.294118	7.91139				20		214	34		24	26			18	617	17	103	5		450	12.5	27		16	3.7	1.09	3.6		2.95
Iliniza	Arc Front	ILI 16B	6	62.3426	0.588904	16.1441	6.51856	5.8667	0.111689	3.6045	6.09211	1.36057	3.7365	0.152303	100	5.09707			0.232394	8.8				17.3		148	83		19	21			29	410	14.2	107	3.3		590	11	22.5		12.6	2.9	0.82	2.95		2.4
Iliniza	Arc Front	ILI 14A	6	63.3469	0.577724	16.5209	6.15226	5.53703	0.0912196	2.85821	5.52385	1.48992	3.90217	0.152033	100	5.39209			0.263636	10.5882				15.6		138	44		17	16			30	410	11	106	2.9		632	10.8	22.5		11.2	2.35	0.81	2.45		2
Iliniza	Arc Front	ILI 11	6	63.4818	0.58817	16.2254	6.07437	5.46694	0.0912677	2.83944	5.52677	1.51099	4.11719	0.152113	100	5.62818			0.296	11.5385				13.2		134	60		17	17			31	420	12.5	115	3.7		610	12	24.5		13	2.8	0.83	2.9		2.2
Iliniza	Arc Front	ILI 22A	6	63.6749	0.589018	16.2488	6.00189	5.4017	0.0913993	2.82322	5.53474	1.51317	3.97079	0.152332	100	5.48396			0.338983	11.3725				12.8		134	59		17	19			31	425	11.8	112	4		630	11.6	24		13	3	0.82	2.7		2.15
Iliniza	Arc Front	ILI 18	6	64.3242	0.582938	16.4831	5.56806	5.01126	0.0904559	2.29155	5.3972	1.4875	4.17102	0.16081	100	5.65852			0.342857	13.9535				11		145	22		15	10			31	465	10.5	76	3.6		640	12	24		12.8	2.8	0.83	2.65		1.95
Iliniza	Arc Front	ILI 19A	6	65.0021	0.566997	16.453	5.40672	4.86605	0.0809995	2.19711	5.28522	1.42762	3.96898	0.151874	100	5.39659			0.33	13.4118				11		118	22		14	9			31	447	10	103	3.3		645	11.4	23		12.3	2.75	0.8	2.55		1.85
Iliniza	Arc Front	ILI 45	6	57.7031	0.711129	17.6766	8.17799	7.36019	0.111749	4.19566	7.51765	0.893991	3.67755	0.152385	100	4.57154			0.176471	6.5812				20		182	70		22	22			16	464	13.6	69	2.4		344	7.7	16		10.8	2.6	0.87	2.95		2.45
Iliniza	Arc Front	ILI 50	6	61.811	0.668774	16.4154	6.91067	6.2196	0.101329	3.72892	5.82644	1.16529	3.92145	0.141861	100	5.08674			0.311321	9.46237				14.8		148	140		19	41			22	427	10.6	76	3.3		495	8.8	18.5		10.6	2.6	0.85	2.45		1.95
Iliniza	Arc Front	ILI 81	6	62.3059	0.614994	16.3326	6.67419	6.00678	0.0907368	3.56898	5.84748	1.07876	4.01258	0.141146	100	5.09134			0.322917	10.9639				13		136	115		20	41			19	422	9.6	77	3.1		460	9.1	20		11	2.7	0.81	2.3		1.8
Iliniza	Arc Front	ILI 51	6	62.5643	0.666007	16.1456	6.78117	6.10305	0.10091	3.44104	5.75188	1.21092	3.87495	0.141274	100	5.08587			0.307018	11.0753				13.7		144	117		19	33			23	429	11.4	90	3.5		520	10.3	21		12.5	2.75	0.86	2.8		2.05
Iliniza	Arc Front	ILI 82	6	62.5315	0.574887	16.3389	6.15229	5.53707	0.0907716	3.73172	5.74887	1.30106	4.00403	0.1412	100	5.30509			0.258621	9.81132				14.5		145	140		18	43			26	424	11.6	82	3		546	10.4	21.5		10.8	2.85	0.79	2.45		2.05
Iliniza	Arc Front	ILI 79B	6	62.7818	0.636917	16.5801	6.42983	5.78685	0.0909881	2.94195	5.81313	1.3446	3.88216	0.141537	100	5.22676			0.327869	10.6931				13.2		138	62		17	22			30	400	12.2	98	4		542	10.8	23.5		12.5	3.1	0.86	2.75		2.3
Iliniza	Arc Front	ILI 79A	6	62.8051	0.65422	16.4058	6.59252	5.93327	0.100649	3.01948	5.83765	1.26818	3.83473	0.140909	100	5.10291			0.328	10.6667				14		140	67		18	23			27	397	12.5	96	4.1		540	11.2	26		13	2.85	0.88	2.85		2.3
Iliniza	Arc Front	ILI 5	6	63.8926	0.579917	16.2784	5.90091	5.31081	0.0915658	2.72663	5.33116	1.53627	4.10011	0.15261	100	5.63638			0.258065	10.8911				12.6		126	51		15	14			31	426	12.4	110	3.2		612	11	24.5		12.5	2.7	0.81	2.8		2.15
Iliniza	Arc Front	ILI 7A	6	64.4013	0.549395	16.2784	5.59569	5.03612	0.0915658	2.79784	5.03612	1.37349	4.29342	0.142436	100	5.6669			0.303571	10.8421				12		110	60		14	20			26	417	11.2	92	3.4		530	10.3	21.5		11.5	2.6	0.79	2.6		1.95
Iliniza	Arc Front	ILI 2B	6	64.1551	0.597027	16.0388	6.0411	5.43699	0.0910719	2.72204	5.46431	1.25477	4.08812	0.151787	100	5.34289			0.330275	11.0227				13.3		125	52		17	19			25	419	10.9	94	3.6		560	9.7	20		11	2.5	0.77	2.6		1.9
Iliniza	Arc Front	ILI 36C	6	64.5227	0.548697	16.2577	5.63938	5.07545	0.0812884	2.62155	5.23294	1.34126	4.16603	0.152416	100	5.50729			0.342593	11.0526				11.3		116	59		15	22			28	415	10.8	90	3.7		565	10.5	20.8		12.5	2.6	0.78	2.6		1.95
Iliniza	Arc Front	ILI 77A2	6	64.437	0.577502	16.2106	5.8662	5.27958	0.0810529	2.57343	5.3191	1.26645	4.11343	0.141843	100	5.37988			0.343137	12.9762				11		124	57		16	15			25	412	10.2	84	3.5		530	10.9	22		12.1	2.85	0.8	2.55		1.9
Iliniza	Arc Front	ILI 4A	6	65.0651	0.559153	16.2663	5.45937	4.91343	0.0813314	2.21628	4.90022	1.6063	4.2394	0.152496	100	5.84569			0.308411	11.4943				10.7		113	30		15	12			27	423	10.7	98	3.3		570	10	21.5		11.5	2.55	0.77	2.45		1.9
Iliniza	Arc Front	ILI 35A	6	64.6541	0.553459	16.5031	5.48428	4.93585	0.0805031	2.46541	5.13208	1.35849	4.1761	0.140881	100	5.53459			0.3	10.9677				12		115	43		15	15			27	408	11	97	3.3		535	10.2	22		12	2.75	0.76	2.4		1.95
Iliniza	Arc Front	ILI 41	6	64.9364	0.575641	16.1584	5.65542	5.08988	0.0807918	2.53484	5.06968	1.34316	4.05979	0.151485	100	5.40295			0.352941	11.4894				12		118	51		14	20			26	425	10.2	91	3.6		575	10.8	22		12.1	2.75	0.79	2.4		1.95
Iliniza	Arc Front	LI 32B2	6	65.6452	0.530466	16.118	5.13124	4.61812	0.0816102	2.22388	5.04963	1.39757	4.18252	0.153019	100	5.5801			0.318182	13.587				9.8		104	36		13	15			29	420	11	85	3.5		600	12.5	24.5		13.7	2.8	0.82	2.7		1.95
Iliniza	Arc Front	TIS 1	6	65.4157	0.526566	16.3033	5.33655	4.80289	0.0810102	2.1974	4.86061	1.37717	4.30367	0.131642	100	5.68084			0.36	12				10.2		107	31		13	11			28	405	10	96	3.6		560	10.2	22.5		11.5	2.55	0.73	2.2		1.7
Iliniza	Arc Front	ILI 43	6	65.318	0.564476	16.0271	5.5742	5.01678	0.0806395	2.36878	5.01981	1.36079	4.10253	0.141119	100	5.46332			0.346154	13.3721				10.4		109	44		12	15			26	425	10.4	87	3.6		570	11.5	22		12.8	2.6	0.82	2.6		1.85
Iliniza	Arc Front	ILI 4B	6	65.4319	0.533521	16.358	5.23455	4.71109	0.0805315	2.15422	4.88222	1.38917	4.3185	0.14093	100	5.70767			0.323529	12.3596				10.3		107	30		14	13			28	414	10.2	94	3.3		570	11	22.5		11.2	2.7	0.77	2.5		2
Iliniza	Arc Front	ILI 29A	6	67.595	0.487904	15.6536	4.47245	4.02521	0.060988	1.81948	4.37081	1.54503	4.30982	0.132141	100	5.85485			0.469136	18.4615				7.8		88	35		11	12			32	405	8.1	51	3.8		655	12	23		12.7	2.6	0.74	2.3		1.55
Iliniza	Arc Front	ILI 64	6	71.764	0.328064	15.2242	2.85005	2.56505	0.05126	0.697136	3.13711	1.45578	4.65441	0.123024	100	6.11019			0.836364	43.5135				2.3		33	6		4	6			30	455	5.5	76	4.6		705	16.1	33		17	3	0.91	2.9		1.2
Iliniza	Arc Front	ILI 55B	6	68.4425	0.344747	16.8825	3.51845	3.1666	0.0608377	0.953125	4.00515	1.41955	4.58311	0.141955	100	6.00266			0.486111	21.0714				4.2		54	4		5	3			28	470	7.2	72	3.5		600	11.8	24.5		13.5	2.9	0.79	2.1		1.4
Iliniza	Arc Front	ILI 25	6	69.2383	0.366017	16.1658	3.59917	3.23925	0.0610029	1.00655	3.83301	1.47424	4.47355	0.14234	100	5.94778			0.5	22.7273				4.5		55	5		6	3			30	448	7.2	60	3.6		760	12.5	25		13.8	2.55	0.76	2.15		1.45
Iliniza	Arc Front	ILI 37A	6	60.6552	0.608581	15.8738	6.69439	6.02495	0.10143	4.51364	6.44082	1.6736	3.90506	0.20286	100	5.57866			0.344538	18.75				15.6		152	130		25	78			33	620	11.9	88	4.1		665	18	35		19	3.8	1.03	3.05		2.15
Iliniza	Arc Front	ILI 1A	6	62.7452	0.608192	15.4582	6.25424	5.62882	0.101365	3.73025	6.00083	1.61171	3.93298	0.182458	100	5.54469			0.325	15.625				16		143	106		20	35			32	550	12	100	3.9		650	15	28		16	3.25	0.96	2.85		2.1
Iliniza	Arc Front	TIS 4B	6	62.7638	0.607392	15.7112	6.24601	5.62141	0.0911088	3.58361	5.83096	1.61971	3.99866	0.172094	100	5.61838			0.357143	16.9565				14		136	101		19	30			32	548	11.2	97	4		620	15.6	31.5		16	3.35	0.91	2.6		1.95
Iliniza	Arc Front	ILI 1B	6	63.1526	0.587937	15.5905	6.08211	5.4739	0.0912316	3.43639	5.90978	1.59149	3.98378	0.182463	100	5.57527			0.366071	16.2222				15		139	102		20	33			32	546	11.2	102	4.1		690	14.6	30		15	3	0.91	3		1.9
Pichincha	Arc Front	PICH 158	1	64.1307	0.422111	16.6432	5.26633	4.73367	0.0904523	2.60302	5.04523	1.75879	4.43216	0.140704	100	6.19095			0.265467	12.8537	15.34	0.87		10.81	2139.64	104.82			15.19	21.78	26.42	62.81	41.38	548.67	8.89	84.95	2.36	1.11	840.3	10.54	20.41	2.64	10.42	2.15	0.66	1.94	0.27	1.63	0.31
Pichincha	Arc Front	PICH 158B	1	65.3039	0.393701	16.0711	4.9364	4.44175	0.0807591	2.61458	5.27963	1.70604	3.9471	0.161518	100	5.65314			0.280532	13.1538	15.18	0.82		10.18	2054.77	101.76			15.55	24.39	31.98	63.31	41.44	522.55	8.27	82.9	2.32	1.12	834.19	10.26	19.89	2.56	10.06	2.05	0.62	1.82	0.26	1.5	0.29
Pichincha	Arc Front	PICH 33	1	63.6603	0.415484	16.8119	5.24929	4.72233	0.0912039	2.72598	5.22902	1.78354	4.41832	0.141873	100	6.20186			0.299886	14.3902	15.67	0.86		10.41	2267.57	106.71			15.75	22.53	25.46	64.32	43.02	514.49	8.77	78.85	2.63	1.11	849.18	11.8	22.73	2.9	11.16	2.27	0.68	2	0.27	1.58	0.31
Pichincha	Arc Front	PICH 35E	1	64.9049	0.388469	16.7348	4.79452	4.31405	0.0817829	2.36148	4.90697	1.80945	4.35494	0.14312	100	6.16438			0.335085	16.7826	15.78	0.89		8.7	2081.47	96.7			13.58	18.5	20.69	62.8	43.17	540.56	7.61	63.99	2.55	1.11	871.97	11.58	22.21	2.8	10.88	2.15	0.66	1.83	0.25	1.42	0.27
Pichincha	Arc Front	PICH 35F	1	64.6065	0.422332	16.4194	5.2637	4.72806	0.092707	2.49279	5.36671	1.75113	3.9349	0.185414	100	5.68603			0.336353	18.1646	16.45	0.92		9.28	2258.1	98.94			14.73	19.74	34.68	65.79	46.91	553.21	8.83	72.38	2.97	1.24	911.42	14.35	27.38	3.45	13.24	2.57	0.74	2.18	0.3	1.65	0.31
Pichincha	Arc Front	PICH 37	1	63.203	0.500153	17.0358	5.63438	5.07298	0.0816577	2.57222	5.28733	2.00061	4.08288	0.163315	100	6.08349			0.374853	22.6429	14.29	0.83		9.25	2513.44	108.79			15.85	20.76	24.56	70.35	48.47	522.67	8.51	83.84	3.19	1.28	820.63	15.85	30.09	3.77	14.29	2.76	0.78	2.25	0.3	1.62	0.3
Pichincha	Arc Front	PICH 004C	7	58.9782	0.574365	16.3543	7.6179	6.85208	0.110842	5.20959	6.75131	1.33011	3.68803	0.151149	100	5.01814			0.277778	12.2222				18		177	165			81			29	505	10.8	81	3		550	12.1	25		13	2.6	0.77	2.4		2
Pichincha	Arc Front	PICH 009C	7	62.5817	0.493007	16.893	6.15756	5.54382	0.0905524	2.94798	5.69474	1.56957	4.04467	0.140859	100	5.61425			0.341176	13.2184	12.7	0.81	18.3	12.5		135	55			26			35.5	490	8.5	86	2.9		640	11.5	23		11.8	2.6	0.72	2.6		1.45
Pichincha	Arc Front	PICH 010	7	65.2829	0.452307	16.273	5.22666	4.70399	0.0703588	2.43241	4.72409	1.70871	4.22153	0.130666	100	5.93024			0.516667	16.875				10.6		115	80			27			38.5	505	6	88	3.1		740	10.8	22		10.5	2.3	0.7	2.5		1.3
Pichincha	Arc Front	PICH 144	7	58.7725	0.604656	15.973	7.63882	6.87292	0.120931	5.84501	7.30626	0.735665	3.62794	0.141086	100	4.3636			0.208333	5.90909	7.4	0.62		20		174	425			111			11.7	406	12	83	2.5		355	6.5	14		8.2	2.25	0.72	2.6		2.1
Pichincha	Arc Front	PICH 145A	7	60.582	0.594039	17.348	6.71567	6.04108	0.100685	3.66492	6.3532	1.22835	3.95691	0.13089	100	5.18526			0.228814	7.06897	10.9	0.75		17		155	90			40			27.8	432	11.8	84	2.7		580	8.2	16.5		9.4	2.25	0.72	2.6		2.1
Pichincha	Arc Front	PICH 111C	7	62.1905	0.573787	17.1431	6.53312	5.8788	0.0905979	2.9696	5.64727	0.996577	4.38897	0.120797	100	5.38554			0.257143	7.17647	10.2	0.74	14.8	13		142	54			31			18.5	401	10.5	80	2.7		450	6.1	13.5		8.8	2	0.7	2.3		1.85
Pichincha	Arc Front	PICH 021A	7	63.5989	0.523034	16.5258	5.74331	5.16999	0.0804667	3.04768	5.40133	1.03601	4.50614	0.110642	100	5.54214			0.325	10.3333	12.6	0.76	13.5	11.5		125	109			42			20.5	412	8	33	2.6		475	6.2	12.5		8	2	0.65	2.3		1.45
Pichincha	Arc Front	PICH 070B	7	55.8301	0.574945	15.7152	8.53339	7.67601	0.141214	7.81723	8.05931	1.1398	2.91507	0.131128	100	4.05487			0.193798	5.35433	8.2	0.52	13.6	26.5		194	300			150			22	390	12.9	68	2.5		430	6.8	14		8	2.05	0.65	2.3		2.15
Pichincha	Arc Front	PICH 071	7	58.9842	0.564345	16.9808	7.6489	6.883	0.120931	4.53492	6.81246	1.3504	3.61786	0.151164	100	4.96826			0.230769	7.46154	9.8	0.68	15.8	19.8		166	136			65			30.5	435	13	90	3		595	9.7	19		10.8	2.35	0.73	2.55		2.25
Pichincha	Arc Front	PICH 074	7	60.1773	0.614362	16.1144	7.09034	6.38534	0.100715	4.75375	6.70762	1.18844	3.80703	0.151073	100	4.99547			0.269565	9.89691	10.5	0.69	16.5	17.5		156	275			93			22.5	460	11.5	81	3.1		535	9.6	17.5		11.5	2.45	0.8	2.6		1.9
Pichincha	Arc Front	PICH 075	7	60.9523	0.573787	15.905	6.73445	6.06	0.100664	4.80169	6.38212	1.13751	3.93598	0.150997	100	5.07349			0.291262	9.67391	11.2	0.72	13.3	17		150	250			86			22	470	10.3	81	3		538	8.9	18		11	2.25	0.78	2.3		1.75
Pichincha	Arc Front	PICH 116	7	60.6384	0.594099	16.091	6.93787	6.24308	0.100695	4.82328	6.3337	1.21841	3.81633	0.140973	100	5.03474			0.274336	10.7143	11.2	0.71	13.5	17.5		154	232			81			25	470	11.3	82	3.1		548	10.5	20		13	2.8	0.79	2.7		2.1
Pichincha	Arc Front	PICH 121A	7	59.9174	0.523824	16.2385	7.36376	6.62839	0.110809	5.09721	6.60824	1.10809	3.64662	0.120882	100	4.75471			0.235772	7.31092	8.8	0.63	26.3	20.5		180	238			61			22	388	12.3	80	2.9		470	8.7	16		10	2.35	0.73	2.35		2.1
Pichincha	Arc Front	PICH 120	7	59.9617	0.523771	16.3074	7.29251	6.56728	0.110798	5.17728	6.4867	1.0979	3.64625	0.12087	100	4.74416			0.211382	7.21739	9.2	0.65	13	20		160	220			68			24	387	12.3	80	2.6		480	8.3	16.5		9.7	2.25	0.71	2.25		2.05
Pichincha	Arc Front	PICH 105	7	60.4672	0.644447	16.3629	6.95801	6.26322	0.0906253	4.74272	6.4344	0.946531	3.90696	0.140973	100	4.85349			0.276786	10.1064	8.4	0.72	9.6	18.5		165	245			71			17	444	11.2	85	3.1		456	9.5	17.6		11.7	2.7	0.8	2.6		2
Pichincha	Arc Front	PICH 107B	7	61.0513	0.58403	16.7758	6.82711	6.14238	0.100695	3.85661	6.11217	1.19827	4.04793	0.130903	100	5.2462			0.238462	8.03279	12.5	0.77	16	18.6		154	133			44			24	410	13	94	3.1		535	9.8	19		11.8	2.6	0.79	2.5		2.2
Pichincha	Arc Front	PICH 056	7	61.6167	0.603986	16.8714	6.45259	5.80834	0.100664	3.39239	6.30159	1.16771	3.98631	0.150997	100	5.15402			0.246032	8.77193	11	0.83	12.1	17.4		156	98			26			23.5	444	12.6	100	3.1		590	10	18.5		11.5	2.6	0.8	2.7		2.1
Pichincha	Arc Front	PICH 026	7	60.2479	0.584442	16.2334	7.51713	6.76139	0.100766	4.04071	6.842	1.2495	3.79887	0.141072	100	5.04837			0.295918	11.5116	9.8	0.71	14.1	18		170	245			73			25	476	9.8	75	2.9		550	9.9	18.5		10.7	2.5	0.75	2.05		1.75
Pichincha	Arc Front	PICH 012B	7	61.4092	0.513337	16.3362	6.4922	5.84801	0.0905888	4.6301	5.83795	1.27831	3.92552	0.130851	100	5.20382			0.263158	9.88235				15.4		139	224			71			25	462	9.5	78	2.5		545	8.4	17.5		10	2.35	0.8	2.4		1.8
Pichincha	Arc Front	PICH 042A	7	60.8538	0.563834	16.1196	6.79621	6.12163	0.100685	4.71204	6.38341	1.17801	3.82602	0.140959	100	5.00403			0.287037	8.95833	8.7	0.72	13	17.5		155	242			83			23	449	10.8	83	3.1		540	8.6	17		10.5	2.45	0.75	2.6		1.85
Pichincha	Arc Front	PICH 057	7	61.0333	0.584147	16.6986	7.24141	6.51627	0.100715	3.5351	6.45584	0.93665	3.99839	0.141001	100	4.93504			0.20339	7.62887	8.9	0.73	14.3	15		159	92			27			17	410	11.8	83	2.4		396	7.4	16		10	2.5	0.77	2.4		2.1
Pichincha	Arc Front	PICH 063B	7	59.4641	0.554045	16.8832	7.47456	6.72912	0.120882	4.76478	6.99103	0.795809	3.57611	0.120882	100	4.37191			0.172414	4	13.4	0.59	15.4	23.8		175	180			41			17	375	14.5	75	2.5		370	6	13		8	2.1	0.68	2.45		2.35
Pichincha	Arc Front	PICH 076	7	62.3994	0.533414	16.4553	6.26006	5.63607	0.0905797	3.53261	5.75684	1.28824	4.1566	0.150966	100	5.44485			0.3125	12.4096				13.8		137	151			46			26	488	9.6	86	3		590	10.3	19.5		11.3	2.5	0.76	2.35		1.6
Pichincha	Arc Front	PICH 051	7	63.5888	0.492859	16.4554	5.73325	5.15993	0.0804667	3.26896	5.3108	1.38805	4.12392	0.130758	100	5.51197			0.333333	11.4474	11.3	0.73	13	12.7		130	128			40			29	473	8.4	88	2.8		655	8.7	16.5		9.5	2.15	0.68	2.2		1.4
Pichincha	Arc Front	PICH 136A	7	60.9808	0.543752	16.4334	6.95801	6.26322	0.110764	4.04793	6.25315	1.28889	3.9271	0.151042	100	5.21599			0.216	8.52174	9.1	0.72	12.5	18.7		161	124			53			28	465	12.5	85	2.7		535	9.8	19		10.9	2.5	0.77	2.45		2.15
Pichincha	Arc Front	PICH 135	7	62.0974	0.503221	16.093	6.4211	5.77697	0.100644	4.03583	5.91787	1.4996	3.83454	0.140902	100	5.33414			0.288462	11.7204	11.2	0.72	14.9	15.8		145	161			60			37	444	10.4	74	3		640	10.9	21		11.2	2.5	0.72	2.45		1.95
Pichincha	Arc Front	PICH 112	7	63.4041	0.472789	16.6382	5.8646	5.28116	0.0905342	2.78644	5.50246	1.73021	3.95332	0.140831	100	5.68353			0.326531	16.1176				12.5		133	66			27			41	502	9.8	88	3.2		730	13.7	26.5		12.8	2.4	0.73	2.4		1.75
Pichincha	Arc Front	PICH 001	7	64.0221	0.452489	16.6616	5.6008	5.04776	0.0804424	2.52388	5.19859	1.78984	4.09251	0.130719	100	5.88235			0.297872	16.3218	8.5	0.8	16	11.7		128	57			23			41	505	9.4	87	2.8		765	14.2	26		12.5	2.6	0.7	2.5		1.8
Pichincha	Arc Front	PICH 154B	7	59.8348	0.594219	18.6927	7.08027	6.37526	0.100715	3.2531	6.10333	1.24887	3.64589	0.151073	100	4.89475			0.329787	13.6585	12.2	0.79		13.4		152	65			34			30.5	506	9.4	94	3.1		590	11.2	20.5		11.5	2.38	0.72	1.8		1.65
Pichincha	Arc Front	PICH 154E	7	59.15	0.574076	19.3474	7.05006	6.34505	0.0906436	3.36388	6.17383	1.12801	3.65596	0.171216	100	4.78397			0.352273	12.8205	12.8	0.81		14.2		150	67			37			24.5	496	8.8	93	3.1		650	10	19		10	2.2	0.71	1.7		1.5
Pichincha	Arc Front	PICH 141C	7	62.3428	0.513233	16.5442	6.16886	5.555	0.0905706	3.37124	5.66569	1.76109	3.99517	0.161014	100	5.75626			0.3	18.125				13		142	92			48			42	515	10	72	3		720	14.5	26.5		12.8	2.65	0.78	2.5		1.7
Pichincha	Arc Front	PICH 037D1	7	59.6917	0.5541	16.6532	7.35442	6.61898	0.11082	4.66452	6.63913	1.40036	3.50594	0.161193	100	4.90631			0.268519	12.7835	11.5	0.69	17.3	18.2		165	129			66			32.5	459	10.8	85	2.9		595	12.4	23		12.2	2.45	0.73	2.45		1.8
Pichincha	Arc Front	PICH 066C3	7	66.6131	0.391842	15.9952	4.69205	4.21983	0.0803778	2.04963	4.30021	2.24053	3.99879	0.110519	100	6.23932			0.571429	28.6792	12.4	0.91	3.1	8.1		100	40			21			53	440	6.3	30	3.6		840	15.2	25		10.6	1.9	0.62	1.85		1.2
Pichincha	Arc Front	PICH 066E	7	63.1187	0.503018	16.6901	5.96579	5.37223	0.0905433	2.70624	5.62374	1.78068	3.95372	0.160966	100	5.73441			0.340426	20.5128	13.9	0.8	22	11.2		133	57			34			43	524	9.4	86	3.2		760	16	29.5		14.5	2.9	0.8	2.65		1.7
Pichincha	Arc Front	PICH 66G	7	62.9641	0.51313	16.8226	6.21793	5.60419	0.0905524	2.75682	5.61425	1.74062	3.71265	0.181105	100	5.45326			0.366667	20.9459	12.7	0.86		10.6		137	54			30			41	495	9	89	3.3		745	15.5	28.5		14	2.85	0.77	1.9		1.6
Pichincha	Arc Front	PICH 091A1	7	64.4107	0.472647	16.613	5.53097	4.97788	0.0804505	2.3029	5.05833	2.11183	3.81134	0.160901	100	5.92317			0.452381	28.7879	14.4	0.84	23	8.8		116	41			23			53	515	8.4	70	3.8		834	19	32.5		15.5	2.7	0.76	2.6		1.5
Pichincha	Arc Front	PICH 91D	7	62.8017	0.522928	17.6488	5.67176	5.09855	0.0804505	2.54425	5.36002	1.88053	3.87168	0.19107	100	5.75221			0.393258	24.6269	14.5	0.87		9.3		124	36			27.5			47	530	8.9	72	3.5		740	16.5	29		14	2.85	0.82	2.4		1.6
Pichincha	Arc Front	PICH 097A1	7	64.7869	0.412143	16.8878	5.13671	4.62405	0.0804182	2.2316	4.99598	1.83957	4.0008	0.140732	100	5.84037			0.348315	18.6842	14.7	0.8	21.5	9.8		106	34			21			44.5	510	8.9	60	3.1		810	14.2	24.5		12.4	2.25	0.69	2.35		1.5
Pichincha	Arc Front	PICH 038D	7	65.6517	0.381871	16.4104	4.82364	4.34127	0.0803939	2.17064	4.74324	1.81891	4.27093	0.13064	100	6.08984			0.3625	17.2603	15.6	0.83	23.6	9.5		103	35			20			43	522	8	71	2.9		790	12.6	22.5		11.4	2.1	0.61	2.15		1.5
Pichincha	Arc Front	PICH 032K	7	58.004	0.524194	15.877	8.16532	7.34879	0.131048	6.12903	7.42944	1.23992	3.22581	0.0907258	100	4.46573			0.192	7.96748	9.6	0.55	17	23		195	265			82			29	415	12.5	77	2.4		565	9.8	18		9.7	2.2	0.7	2.3		2.1
Pichincha	Arc Front	PICH 141A1	7	64.2836	0.422323	16.5309	5.48014	4.9271	0.0904977	2.57416	5.16843	1.76973	4.09251	0.140774	100	5.86224			0.284211	15.2439	13.8	0.82	21.8	11.5		120	47			26			42	515	9.5	81	2.7		800	12.5	22.5		11.1	2.15	0.63	2.15		1.6
Pichincha	Arc Front	PICH 141A2	7	59.2141	0.534005	17.5718	7.49622	6.75063	0.120907	3.59698	6.80101	1.43073	3.80856	0.171285	100	5.23929			0.172131	13.9216	12.1	0.72	17.8	15		177	35			40			29.5	560	12.2	86	2.1		680	14.2	26		13.8	2.75	0.85	2.55		2
Pichincha	Arc Front	PICH 1999-10	7	64.6261	0.381986	16.5862	5.22718	4.70446	0.0904704	2.49296	5.0764	1.70889	4.20185	0.13068	100	5.91074			0.284091	13.4146	15.3	0.8	23	10.5		112	36			25			40	525	8.8	78	2.5		790	11	20		10.5	2.1	0.63	1.7		1.5
Pichincha	Arc Front	PICH 139H	7	52.663	0.708789	12.4747	12.5759	11.3204	0.283516	10.9457	8.58647	0.587282	2.36938	0.0607533	100	2.95666			0.148837	4.49198				36.5		217	560			97			9.7	352	21.5	44	3.2		252	8.4	24		21	5.1	1.22	4.45		3.7
Pichincha	Arc Front	PICH 044D	7	56.3446	0.615292	17.5509	8.62417	7.75671	0.141214	4.96268	7.74662	1.34154	3.38915	0.151301	100	4.73068			0.154321	5.5814	13.9	0.63	13.5	26		205	97			39			25	470	16.2	76	2.5		495	9.6	18.5		11.5	2.6	0.83	2.7		2.5
Pichincha	Arc Front	PICH 040A	7	57.042	0.554491	16.1105	8.18631	7.36969	0.131062	6.41194	7.93427	1.10898	3.20597	0.131062	100	4.31495			0.169231	6.76923	11.7	0.56	13	25.5		197	224			80			22.5	428	13	68	2.2		480	8.8	16.5		9.8	2.2	0.76	2.55		2.2
Pichincha	Arc Front	E05010	8	62.8719	0.480779	17.0676	5.82944	5.2465	0.0801298	2.70438	5.43881	1.77287	3.99647	0.340552	100	5.76935			0.25	11.8333				13.5		104	54			22			45	518	13.2	105	3.3	0.72	723	14.2	26.5	3.3	13.6	2.8	0.7	2.5	0.3	2.2	0.4
Pichincha	Arc Front	E05012	8	62.7136	0.480838	16.7782	6.07698	5.46928	0.0920754	2.73157	5.63706	1.82105	3.92855	0.34784	100	5.7496			0.30303	14.1111				14.3		97	50			20			44.1	526	9.9	105	3	0.73	757	12.7	23.9	2.9	12.4	2.5	0.7	2	0.3	1.8	0.3
Pichincha	Arc Front	E05013	8	63.0443	0.488321	17.0709	5.63604	5.07243	0.0813868	2.88923	5.2291	1.8719	3.90657	0.345894	100	5.77847			0.392857	15				14.3		97	57			18			46.3	492	8.4	109	3.3	0.63	788	12	21.9	2.6	11.1	2.3	0.7	1.8	0.2	1.6	0.3
Pichincha	Arc Front	E05014	8	62.0316	0.500255	16.6985	5.91302	5.32171	0.0900459	3.70189	5.85299	1.36069	4.1121	0.330168	100	5.47279			0.369048	11.125				16.1		100	129			36			28.1	487	8.4	95	3.1	0.32	659	8.9	17.2	2.2	9	2.1	0.6	2.2	0.3	1.6	0.3
Pichincha	Arc Front	E05015	8	62.1607	0.509023	16.4883	5.86873	5.28186	0.0898275	3.75279	5.86873	1.34741	4.17199	0.329368	100	5.5194			0.344444	11.375				15.6		102	134			40			28	495	9	96	3.1	0.46	600	9.1	17.5	2.2	10.2	2.1	0.6	1.9	0.3	1.6	0.3
Pichincha	Arc Front	E05016	8	62.5988	0.470367	16.9832	5.68443	5.11599	0.0900703	2.92228	5.66442	1.78139	4.03315	0.340265	100	5.81454			0.347368	13.6667				14.3		93	48			19			44.7	524	9.5	104	3.3	0.91	730	12.3	23.2	2.8	11	2.3	0.6	1.9	0.3	1.5	0.3
Pichincha	Arc Front	E05017	8	62.4609	0.486039	16.684	6.00109	5.40098	0.0892724	3.17413	5.65392	1.76561	3.94783	0.337251	100	5.71344			0.323232	14.3333				15.6		94	56			20			45	506	9.9	103	3.2	0.96	754	12.9	24	2.9	12.2	2.5	0.7	2	0.3	1.8	0.4
Pichincha	Arc Front	E05018	8	60.4051	0.614938	17.5308	6.58286	5.92457	0.0806476	3.84084	6.33084	0.987933	4.00214	0.282267	100	4.99007			0.271186	7.8				19.5		117	117			34			16.1	431	11.8	94	3.2	0.36	434	7.8	14	2.1	9.9	2.2	0.8	2.2	0.3	2	0.4
Pichincha	Arc Front	E05130	8	59.8005	0.615875	17.0527	7.51166	6.7605	0.100963	4.01833	6.49193	0.888476	3.97795	0.292793	100	4.86643			0.189189	7.81818				19.7		146	150			64			16.4	376	14.8	74	2.8	0.32	447	8.6	13.7	2.5	11.4	2.6	0.8	3	0.4	2.4	0.5
Pichincha	Arc Front	E05131	8	61.5874	0.565114	17.4782	6.00434	5.40391	0.0908219	2.89621	6.18598	1.1605	4.31909	0.312831	100	5.47959			0.235772	5.58333				16.3		120	43			17			21.3	473	12.3	92	2.9	0.48	545	6.7	14	1.9	8.7	2	0.7	2.1	0.3	2	0.4
Pichincha	Arc Front	Gp-1	4	64.3179	0.390351	16.9152	0	4.47403	2.5523	0	5.24472	1.7816	4.19377	0.130117	100	5.97538			0.270652	15.3846				11		111	33			23	41	61	40	534	9.2	81	2.49	1.02	782	12	20.9	2.43	9.92	2.28	0.68	1.99	0.3	1.78	0.34
Pilavo	Arc Front	CHI 103	1	56.9843	0.763183	17.2174	9.41259	8.46891	0.162812	3.73451	7.68271	1.70953	3.00185	0.274746	100	4.71138			0.217617	24.8571				20.5		206	4		22	11			30.5	1090	19.3	119	4.2		1290	43.5	76		35	6	1.65	4.45		3.45
Pilavo	Arc Front	CHI 105	1	57.1701	0.751967	17.9236	9.36354	8.42478	0.164815	3.78044	7.64329	0.937384	2.97697	0.22662	100	3.91435			0.207865	10				20		195	4		23	9			15.3	620	17.8	77	3.7		550	16.4	31		16.5	3.4	1.09	3.4		3.1
Pilavo	Arc Front	CHI 106	1	56.1134	0.695662	17.6473	9.70858	8.73523	0.173916	4.04098	8.0615	1.32994	2.9361	0.265989	100	4.26605			0.189744	16.8571				22		220	6		24	11			22.3	880	19.5	92	3.7		865	29.5	52		26	4.8	1.34	3.9		3
Pilavo	Arc Front	CHI 108	1	57.6294	0.758282	17.2888	8.69497	7.82324	0.141546	3.4881	7.27951	1.90076	3.38699	0.303313	100	5.28775			0.234973	20.3947				19.5		220	4		23	12			34.5	938	18.3	120	4.3		1090	31	59		28	5.15	1.46	4.15		3.15
Pilavo	Arc Front	CHI 109	1	58.0644	0.779664	17.2347	8.20698	7.38418	0.133363	3.28279	7.03749	2.31847	3.38538	0.379573	100	5.70385			0.323529	31.6176				17.4		190	12		21	15			43.5	1215	17	170	5.5		1340	43	83		39	6.6	1.8	5		2.75
Pilavo	Arc Front	CHI 24	1	56.5694	0.788388	17.3036	9.52209	8.56744	0.163821	3.84979	7.47433	1.88394	3.05116	0.348119	100	4.93511			0.257143	40.3409				22		220	12		23	15			30	1310	21	170	5.4		1690	71	121		50	8.5	2.2	5.75		3.75
Pilavo	Arc Front	CHI 278	1	56.7415	0.768855	17.3249	9.32877	8.3935	0.164022	3.75201	8.09861	1.48645	2.94215	0.328045	100	4.4286			0.222222	15.1685				21		202	6		24	11			28.5	880	19.8	115	4.4		765	27	50		25	4.9	1.41	4.3		3.3
Pilavo	Arc Front	PIL 1	1	57.7432	0.767862	17.2513	8.74339	7.8668	0.143334	3.47074	7.32028	1.9043	3.22502	0.307145	100	5.12932			0.257143	20.9459				18.4		204	3		23	11			36	960	17.5	118	4.5		1060	31	58		27	5.2	1.4	4		3
Pilavo	Arc Front	PIL22	1	57.5774	0.768381	17.1605	8.91323	8.01961	0.153676	3.58578	7.54038	1.84412	3.0223	0.327843	100	4.86642			0.224719	20.3333				19		212	3		22	11			35	910	17.8	117	4		995	30.5	56		28	5	1.42	4.4		3.1
Pilavo	Arc Front	PIL23	1	57.6388	0.763765	17.312	8.75783	7.8798	0.152753	3.45222	7.53581	1.83304	3.10598	0.325873	100	4.93901			0.233333	20.0658				19		207	6		22	11.5			34	930	18	119	4.2		1040	30.5	55		28	5.1	1.42	4.1		3.1
Pilavo	Arc Front	PIL24	1	58.1213	0.722699	17.5076	8.49935	7.64723	0.152683	3.24706	7.32878	1.73041	3.25723	0.285008	100	4.98764			0.195652	15.9639				18.5		170	4		20	10			31	875	18.4	107	3.6		885	26.5	49		25	4.7	1.3	3.7		3.1
Pilavo	Arc Front	PIL25	1	57.9038	0.728223	17.5481	8.56673	7.70786	0.151713	3.26689	7.48451	1.69919	3.21632	0.293312	100	4.9155			0.220339	15.9375				19		186	4		20	10			31	880	17.7	96	3.9		915	25.5	46		24.5	4.7	1.26	3.9		3.05
Pilavo	Arc Front	PIL26	1	60.7402	0.622714	17.8137	6.94173	6.24578	0.13271	2.5419	6.24756	1.91918	3.47087	0.265419	100	5.39005			0.2875	21.1806	15.1	1.34	7.3	14.5		242	6		15	9			35.5	940	16	130	4.6		1050	30.5	56		26.5	4.9	1.33	3.8		2.75
Pilavo	Arc Front	PIL27	1	57.2935	0.768697	17.7825	9.01937	8.11512	0.163989	3.56675	7.32824	1.66038	3.02354	0.297229	100	4.68393			0.215789	16.092	10.4	1.16	6.8	20.5		242	4		23	11			31	840	19	103	4.1		940	28	50		26.5	4.9	1.36	3.95		3.25
Pilavo	Arc Front	PIL28	1	57.2509	0.686607	17.872	9.18842	8.26722	0.161555	3.60469	7.87579	0.969328	3.10993	0.201943	100	4.07926			0.166667	9.53947				20.5		210	8.5		23	12			17.3	640	16.8	73	2.8		560	14.5	27.5		16	3.3	1	3.2		2.8
Pilavo	Arc Front	PIL29	1	57.1596	0.699913	17.8529	9.37275	8.43307	0.152155	3.6923	7.8512	0.933218	3.02281	0.202873	100	3.95603			0.155	8.68571				21		212	8		25	13			15.4	628	20	70	3.1		550	15.2	29		17.8	3.85	1.11	3.8		3.4
Pilavo	Arc Front	PIL31	1	56.6322	0.768068	17.5119	9.31922	8.3849	0.163854	3.72769	7.78308	1.81264	2.9289	0.286745	100	4.74154			0.226804	26.7442				21		213	7		23	12			30.5	1070	19.4	122	4.4		1370	46	78		36	6.9	1.66	4.8		3.4
Pilavo	Arc Front	PIL32	1	56.8514	0.74509	17.5556	9.21667	8.29263	0.163307	3.62339	7.60401	1.8168	3.06202	0.285788	100	4.87881			0.216216	25.4545				20		206	5		22	11			30	1088	18.5	108	4		1250	42	70		34.5	5.95	1.58	4.5		3.3
Pilavo	Arc Front	PIL33	1	56.1628	0.693116	17.9395	9.47939	8.52901	0.173279	3.83253	8.032	1.37604	2.99671	0.265015	100	4.37275			0.170213	16.4773				22		214	6.5		23	12			23	910	18.8	88	3.2		888	29	50.5		26	4.7	1.29	3.8		3.25
Pilavo	Arc Front	PIL34	1	56.508	0.723547	17.732	9.37554	8.43558	0.163053	3.8827	7.98959	1.32481	2.97572	0.264961	100	4.30052			0.165775	17.9412				23		226	6.5		25	13			21.5	895	18.7	83	3.1		940	30.5	53		26.5	5	1.38	3.9		3.1
Pilavo	Arc Front	PIL-35	1	57.4133	0.668793	18.3661	8.84865	7.96378	0.185204	3.64235	7.6654	0.864286	3.025	0.205782	100	3.88929			0.172654	10.6644	11.71			21.04		202.06	9.59	1162.77	22.62	12.08	25.05	86.36	14.28	695.02	17.26	78.66	2.98	0.6	631.94	15.89	29.74	3.84	15.92	3.38	1.03	3.15	0.48	2.85	0.58
Pilavo	Arc Front	PIL-36	1	56.5903	0.777732	17.3966	9.33279	8.40156	0.163733	3.76586	7.64429	1.89316	3.01883	0.347933	100	4.91199			0.24683	40.8251	11.35			22.19		213.47	8.59	1215.6	23.06	11.86	24.88	93.03	30.54	1371.14	22.08	181.34	5.45	1.03	1709.46	74.71	130.98	14.06	51.91	8.51	2.31	6.07	0.77	3.96	0.76
Pilavo	Arc Front	PIL38	1	57.8653	0.772893	17.1359	8.70522	7.83246	0.142375	3.40683	7.47469	1.88139	3.17293	0.315259	100	5.05432			0.247059	20.9459				18.5		208	4		22	11			35	972	17	120	4.2		1110	31	55		28.5	5.35	1.45	4.2		3
Pilavo	Arc Front	PIL39	1	58.0059	0.780257	17.2478	8.56229	7.70386	0.143731	3.26476	7.28924	2.09437	3.13129	0.338796	100	5.22567			0.258824	25.3521				17.5		198	4		22	10.5			40	1040	17	132	4.4		1200	36	63.5		32	5.5	1.53	4.6		3.05
Pilavo	Arc Front	PIL40	1	57.5442	0.766575	17.3757	8.68785	7.81683	0.143094	3.51602	7.56354	1.83978	3.1174	0.316851	100	4.95718			0.257143	20.2614				19		205	4		23	12			34.5	960	17.5	118	4.5		1045	31	55		28.5	5.2	1.43	4.1		3.15
Pilavo	Arc Front	PIL41	1	57.5523	0.795935	17.3473	8.36753	7.52863	0.132656	3.34701	7.16342	2.38781	3.33681	0.408172	100	5.72461			0.304598	32.5				18		200	15.5		22	17.5			42	1280	17.4	165	5.3		1415	45.5	81		41	7.2	1.9	5.4		3.25
Pilavo	Arc Front	PIL42	1	58.3618	0.776795	16.9668	8.07457	7.26504	0.132873	3.26049	7.15469	2.42237	3.25027	0.408839	100	5.67264			0.317647	32.963				18		198	15		22	17			44	1248	17	168	5.4		1348	44.5	80		40	7	1.84	4.95		3.15
Pululahua	Arc Front	E05001	8	65.0765	0.428069	17.6006	4.27074	3.84367	0.0597306	1.67246	5.30607	1.10502	4.5893	0.318563	100	5.69432			0.302326	9.57143				10.4		60	19			6			17.9	481	8.6	94	2.6	0.36	597	6.7	14.3	1.9	7.7	1.8	0.6	1.5	0.2	1.3	0.3
Pululahua	Arc Front	E05003	8	63.4856	0.510286	17.3197	5.363	4.8267	0.0800448	2.34131	5.56312	0.990555	4.56256	0.320179	100	5.55311			0.314607	8.125				12.1		84	24			10			15.8	524	8.9	93	2.8	0.38	480	6.5	13.8	1.8	8.3	2	0.6	1.8	0.2	1.5	0.3
Pululahua	Arc Front	E05007	8	64.8464	0.429116	17.5638	4.33108	3.89797	0.0698561	1.70648	5.31904	1.1177	4.72028	0.329322	100	5.83797			0.333333	8.125				10.7		65	18			6			17.8	482	8.4	94	2.8	0.32	587	6.5	13.9	1.8	7.6	1.6	0.6	1.4	0.2	1.4	0.3
Pululahua	Arc Front	E05008	8	64.1897	0.449928	17.6872	4.63926	4.17533	0.0699888	1.8597	5.50912	1.07983	4.65925	0.319949	100	5.73908			0.325581	9.42857				11.1		65	19			5			17.1	485	8.6	92	2.8	0.45	555	6.6	13.7	1.7	8	1.7	0.5	1.6	0.2	1.4	0.3
Pululahua	Arc Front	E05042	8	63.0418	0.559927	17.2678	5.66926	5.10234	0.0799896	2.41969	5.72926	1.03986	4.43942	0.319958	100	5.47929			0.303922	6.36364				15.8		89	48			13			16.8	464	10.2	91	3.1	0.35	589	7	14.9	2	9.2	2	0.7	2.2	0.3	2	0.4
Pululahua	Arc Front	DAN32	1	62.3356	0.556567	16.7476	6.12224	5.50496	0.0910747	3.4406	5.86926	1.02206	4.29063	0.141672	100	5.31269			0.257373	7.57292	14.88			15.6		136.37	100.48	670.96	18.18	32.99	10.91	71.06	16.73	499.09	11.19	85.6	2.88	0.69	471.52	7.27	15.72	2.19	9.54	2.3	0.73	2.23	0.33	1.92	0.38
Pululahua	Arc Front	DAN63C	1	63.2415	0.546786	17.0226	5.71546	5.13773	0.0825338	2.49665	5.82895	0.990405	4.47746	0.175384	100	5.46786			0.266379	7.55	12.01			12.62		121.62	25.4	623.11	14.25	12.31	13.31	62.55	15.5	496.03	11.6	81.08	3.09	0.68	462.96	7.55	16.35	2.26	9.85	2.33	0.73	2.23	0.34	1.95	0.4
Pululahua	Arc Front	Pul-1	4	63.5472	0.570513	16.5749	0	5.555	0	2.75248	5.40486	1.05095	4.40396	0.140126	100	5.45491			0.247414	7.90816				16		121	26			16	28	75	15.9	386	11.6	76	2.87	0.35	467	7.75	15.3	2.17	9.88	2.58	0.78	2.51	0.39	2.22	0.43
Pululahua	Arc Front	Pul-2	4	63.4207	0.570456	16.5532	0	5.63451	0	2.68215	5.41433	1.07086	4.51361	0.140112	100	5.58447			0.253659	8.09091				16		129	31			11	27	75	17.1	425	12.3	83	3.12	0.45	517	8.01	16.4	2.22	10	2.68	0.83	2.64	0.4	2.36	0.46
Pululahua	Arc Front	Pul-3	4	63.1105	0.570456	16.7634	0	5.5044	0	2.85228	5.58447	1.05084	4.42354	0.140112	100	5.47438			0.245	7.41				16		126	33			16	26	77	16.5	416	12	79	2.94	0.56	485	7.41	15.5	2.09	9.49	2.55	0.82	2.52	0.39	2.25	0.44
Pululahua	Arc Front	Pul-4	4	63.3243	0.570399	16.6817	0	5.53387	0	2.75193	5.49385	1.06074	4.44311	0.140098	100	5.50385			0.252137	7.84848				15		125	32			16	23	74	16.2	419	11.7	79	2.95	0.48	494	7.77	15.6	2.07	9.4	2.57	0.81	2.51	0.38	2.26	0.43
Pululahua	Arc Front	Pul-5	4	62.7528	0.540541	16.3063	0	5.36537	0	3.58358	5.77578	1.17117	4.37437	0.13013	100	5.54555			0.230303	7.03279				18		120	121			35	25	68	20.4	399	13.2	90	3.04	0.34	540	8.58	16.2	2.11	9.39	2.46	0.74	2.4	0.39	2.38	0.47
Pululahua	Arc Front	Pul-6	4	63.7374	0.520468	16.3047	0	5.18467	0	3.12281	5.34481	1.24112	4.41397	0.130117	100	5.65509			0.255118	7.77119				16		114	96			28	28	69	22	397	12.7	97	3.24	0.47	576	9.17	17.1	2.21	9.6	2.46	0.74	2.38	0.39	2.27	0.46
Pululahua	Arc Front	Pul-7	4	63.721	0.540432	16.9736	0	5.05404	0	2.58207	5.36429	1.04083	4.57366	0.15012	100	5.61449			0.278351	9.66667				13		111	35			15	22	72	16.3	466	9.7	79	2.7	0.42	465	7.83	15.5	2.04	9.28	2.4	0.77	2.24	0.34	1.89	0.36
Pululahua	Arc Front	Pul-8	4	63.4207	0.55044	16.7034	0	5.39432	0	2.77222	5.3743	1.06085	4.57366	0.15012	100	5.63451			0.2625	9.14286				14		120	35			16	30	75	16.1	451	10.4	78	2.73	0.57	463	7.68	15.5	2.05	9.45	2.47	0.75	2.37	0.35	1.97	0.39
Pululahua	Arc Front	Pul-9	4	61.4075	0.620683	15.9275	0	6.34698	0	4.38482	6.02663	1.07118	4.06447	0.150165	100	5.13565			0.216393	6.76147				20		145	147			37	9	78	16.4	423	12.2	79	2.64	0.6	444	7.37	15	2.01	9.24	2.51	0.79	2.5	0.39	2.36	0.45
Pululahua	Arc Front	Pul-10	4	61.9858	0.630568	16.1746	0	6.27565	0	3.85347	5.70513	1.04094	4.20378	0.130117	100	5.24472			0.235345	7.32353				18		143	103			32	20	77	15.9	429	11.6	81	2.73	0.62	454	7.47	15	2	9.1	2.42	0.78	2.46	0.37	2.21	0.44
Pululahua	Arc Front	Pul-11	4	61.9782	0.610672	16.3179	0	6.13675	0	3.74412	5.78637	1.05116	4.22465	0.150165	100	5.2758			0.227273	7.18447				19		140	87			29	31	80	15.7	424	12.1	80	2.75	0.59	449	7.4	15.2	2.04	9.44	2.52	0.81	2.55	0.39	2.23	0.45
Pululahua	Arc Front	Pul-12	4	62.3461	0.610549	16.3347	0	5.48494	0	3.8835	5.87529	1.07096	4.24382	0.150135	100	5.31478			0.231034	7.50495				19		144	100			31	23	80	15.9	436	11.6	79	2.68	0.58	448	7.58	15.5	1.99	9.2	2.45	0.76	2.42	0.37	2.18	0.41
Quilotoa	Arc Front	A-Q>5-365207	1	67.7393	0.401495	16.4716	3.82964	3.44569	0.0617684	1.58539	4.11789	1.62657	4.41644	0.133832	100	6.04301			0.395349	18.0282				7	2398	78	11		9	6			31	500	8.6	46	3.4		572	12.8	24		11.5	2.5	0.63	2		1.45
Quilotoa	Arc Front	B-Q>5-333140	1	66.967	0.421759	16.6646	3.98099	3.58187	0.0720076	1.68703	4.25873	1.68703	4.5159	0.144015	100	6.20294			0.409639	18				7.5	2518	78	10		10	7			30	512	8.3	46	3.4		590	12.6	24		12	2.75	0.63	2.2		1.5
Quilotoa	Arc Front	C-Q1-292082	1	65.891	0.469921	16.6005	4.49489	4.04425	0.0715097	2.084	4.41317	1.62429	4.63791	0.163451	100	6.2622			0.373626	14.8148				9.2	2805	95	25		13	13			33	518	9.1	60	3.4		625	12	25		12.5	2.8	0.73	2.2		1.7
Quilotoa	Arc Front	D-Q1-370128	1	65.6982	0.459072	16.9346	4.23366	3.80921	0.0714111	1.97911	4.43769	1.60165	4.83555	0.173427	100	6.4372			0.375	16				9	2741	95	21		12	11			32.5	538	8.8	61	3.3		600	12	25		12.5	2.7	0.71	2.1		1.55
Quilotoa	Arc Front	E-Q2-322054	1	66.1322	0.485374	16.078	4.61105	4.14876	0.0707837	2.30553	4.69195	1.51679	4.3987	0.171903	100	5.91549			0.402174	16.2338				9	2896	98	31		14	20			31	500	9.2	45	3.7		600	12.5	27		12.8	2.8	0.64	2.3		1.6
Quilotoa	Arc Front	F-Q2-313120	1	65.9943	0.48276	16.5371	4.33457	3.9	0.0719004	2.10565	4.41674	1.64344	4.69407	0.154072	100	6.33751			0.380952	15.7333				8.8	2882	94	24		13	14			33.5	512	8.4	59	3.2		590	11.8	23.5		11.8	2.6	0.66	2.2		1.55
Quilotoa	Arc Front	G-Q2-328140	1	66.8436	0.462763	16.5566	4.18544	3.76582	0.0719854	1.80992	4.21629	1.58368	4.53508	0.154254	100	6.11876			0.440476	17.3611				7.3	2763	84	19		10	10			37	508	8.4	42	3.7		550	12.5	25		12.4	2.8	0.7	2.3		1.6
Quilotoa	Arc Front	H-Q2-368985	1	66.037	0.459751	17.3974	4.33629	3.90155	0.0731422	1.63003	4.33629	1.50464	4.59751	0.0626933	100	6.10215			0.440476	15.942				7.3	2744	86	12		13	12			33.5	535	8.4	47	3.7		540	11	23		10	2.4	0.63	2.2		1.5
Quilotoa	Arc Front	I-Q3-368985	1	67.2438	0.490755	16.0278	4.57342	4.1149	0.0835327	2.01523	4.12443	1.6811	4.12443	0.0939743	100	5.80552			0.418605	14.4				8.6	2929	93	21		13	15			35	464	8.6	52	3.6		604	10.8	22		10.6	2.5	0.58	1.8		1.5
Quilotoa	Arc Front	QUIL 2	1	66.3204	0.435386	16.8585	4.11085	3.69871	0.0708768	1.79217	4.35386	1.54916	4.75887	0.162004	100	6.30803			0.388889	18.8235				7.5	2599	90	18		10	10			30	540	9	33	3.5		630	12.8	26		14.5		0.65			1.5
Quilotoa	Arc Front	QUIL 3	1	65.6578	0.477696	17.2784	4.0655	3.6579	0.0711462	1.82947	4.31959	1.61603	4.92941	0.16262	100	6.54545			0.413793	19.6923				7.2	2852	85	17		11	10			30.5	540	8.7	32	3.6		630	12.8	27		14		0.65			1.5
Quilotoa	Arc Front	QUIL 4	1	64.452	0.513602	16.7172	5.03531	4.53049	0.080565	2.51766	5.13602	1.43003	4.45122	0.171201	100	5.88124			0.317757	14.3373				11.5	3064	122	38		15.5	17			26.5	512	10.7	49	3.4		592	11.9	25		14		0.7			1.8
Quilotoa	Arc Front	QUIL2	1	66.3224	0.435399	16.8591	4.11098	3.69583	0.0708789	1.79222	4.35399	1.54921	4.75901	0.162009	100	6.30822			0.460023	18.1912	23.38			8.1		83.91	15.19	494.63	10.37	12.2	17.18	67.57	31.22	549.71	8.63	32.65	3.97	1.76	637.55	12.37	25.22	3.19	12.91	2.52	0.75	2.09	0.29	1.52	0.29
Quilotoa	Arc Front	Ql-12	4	66.0262	0.460322	17.0019	0	3.51246	2.0014	0	4.53317	1.62113	4.68328	0.160112	100	6.30441			0.391206	16.8056				8		85	14			15	23	63	30.9	533	8.87	88	3.47	1.65	589	12.1	22.9	2.77	11.4	2.58	0.74	2.18	0.3	1.69	0.33
Pan de Azucar	Arc Rear	PDA-03E	1	47.459	1.33415	14.971	10.8972	9.80752	0.173134	10.4389	11.6101	1.13046	2.58682	0.488848	100	3.71728			0.620979	17.6899	6.81			34.65		305.98	452.95	1369.07	50.18	183.45	103.07	87.71	19.62	1247.3	21.45	104.98	13.32	0.75	889.86	27.95	56.35	7.14	30.07	6.14	1.88	5.44	0.74	3.96	0.75
Pan de Azucar	Arc Rear	PDA-12C	1	59.0151	0.651201	18.7729	5.47416	4.9247	0.172975	1.6687	5.02646	3.4595	5.87098	0.437525	100	9.33048			1.68153	46.5524	25.9341			4.71899		95.7841	8.27261	1241.4	10.479	9.13262	19.9176	95.8805	87.3296	2007.42	30.0671	367.064	50.5588	0.798896	2585.68	118.394	205.409	20.4544	68.2328	9.85294	2.72922	7.29354	0.956482	4.92768	0.949381
Pan de Azucar	Arc Rear	PDA 01A	18	52.6007	1.111	18.6143	9.88789	8.89809	0.1818	4.4036	8.82739	1.5453	3.5148	0.303	100	5.06009			0.298165	10.567	8.75	1.11	6.7	23		235	15			15			31.8	905	21.8	105	6.5		900	20.5	38		21	4.6	1.44	4.1		3.7
Pan de Azucar	Arc Rear	PDA 01B	18	49.0246	1.09168	17.6691	10.8157	9.73416	0.192055	6.32771	11.0179	0.919842	3.41656	0.606489	100	4.3364			0.265517	13.1356	11.1	1.71		32		290	95			42			283	1235	29	130	7.7		1280	31	60		33	7.3	2.14	6.8		5.15
Pan de Azucar	Arc Rear	PDA 03B	18	59.4943	0.674927	18.6663	7.3839	6.64853	0.181324	1.38007	5.5203	2.40758	4.44243	0.584265	100	6.85001			0.369863	19.6078	9	2.08		7		70	4			2			62	970	36.5	175	13.5		1280	50	86		49	9	2.59	7.9		5.6
Pan de Azucar	Arc Rear	PDA 03D	18	59.1977	0.897087	21.6309	8.02338	7.21701	0.100796	1.5825	3.14484	2.69126	3.01381	0.524141	100	5.70507			0.568	30.7263	7.5	1.86		10		142	15			11			59	610	25	195	14.2		2480	55	76		49.5	8.7	2.36	6.6		4.25
Pan de Azucar	Arc Rear	PDA 04A	18	61.1949	0.593442	18.4872	5.85395	5.27057	0.140817	2.0519	5.20016	2.39388	4.35526	0.311808	100	6.74915			0.776471	26.4286	17.1	1.87		6.5		85	12			8			63	998	17	150	13.2		1480	37	70		28.5	5.1	1.41	4.5		3.05
Pan de Azucar	Arc Rear	PDA 04C	18	49.1056	1.30369	16.1496	10.5912	9.53007	0.212228	7.2663	11.0561	1.4856	3.28449	0.606367	100	4.77009			0.739535	19.2737	8	1.4	6.5	28		260	270			120			28	1210	21.5	126	15.9		1000	34.5	67		36	6.8	2.04	5.65		4.2
Pan de Azucar	Arc Rear	PDA 04D	18	47.7496	1.54749	18.7822	11.4696	10.3267	0.192172	5.37069	11.1156	0.799029	3.47932	0.6372	100	4.27835			0.611538	15.5963	10.9	1.6		25		300	22			26			118	1380	26	135	15.9		915	34	68		38	7.9	2.32	6.4		4.9
Pan de Azucar	Arc Rear	PDA 04E	18	50.0353	1.12087	16.0053	9.70413	8.73473	0.181763	8.09856	9.77482	1.86812	3.64536	0.535191	100	5.51348			0.756098	24.3902	10	1.72		22		225	330			162			41.2	1400	20.5	150	15.5		1160	40	73.5		35.5	7	2.01	5.5		3.9
Pan de Azucar	Arc Rear	PDA 05B	18	54.2065	0.79597	19.4458	7.5063	6.76071	0.241814	2.36776	7.49622	3.1335	5.00756	0.544081	100	8.14106			1.14706	38.1481	20	4.4		5.3		135	25			11			75	3100	34	292	39		2550	103	180		76	12.9	3.6	9		6.1
Pan de Azucar	Arc Rear	PDA 05C	18	53.0094	0.816615	19.0947	7.94435	7.1479	0.231878	2.51033	7.92419	3.16564	5.51467	0.584736	100	8.68031			1.11765	37.594	20.6	4.36	14.8	5.5		140	22			10			74	3100	34	285	38		2450	100	177		77	13	3.61	9.1		6.2
Pan de Azucar	Arc Rear	PDA 05D	18	50.293	1.28335	17.9264	10.4891	9.43816	0.181892	4.99192	9.78173	1.76839	3.58731	0.747777	100	5.3557			0.816794	23.3945	11.4	1.8		22		250	60			34			31.4	1425	26.2	166	21.4		1240	51	96		46	8.7	2.48	6.8		4.9
Pan de Azucar	Arc Rear	PDA 05E	18	51.0148	1.19156	18.2268	9.89599	8.90639	0.222155	3.26164	10.0475	1.69646	4.28153	1.15117	100	5.97799			0.539394	27.907	13.3	2.45		12		225	3			7			110	1840	33	220	17.8		1500	72	137		69	12.7	3.55	9.3		6.3
Pan de Azucar	Arc Rear	PDA 07	18	52.8782	1.11089	18.774	9.92729	8.93759	0.171682	4.06988	8.64472	1.59564	3.51444	0.302969	100	5.11008			0.301887	10	8.7	1.11		21		237	14			13			33.2	925	21.2	105	6.4		935	20	38		22	4.5	1.46	4.2		3.75
Pan de Azucar	Arc Rear	PDA 08	18	44.395	1.31526	14.6803	11.7361	10.5625	0.212465	10.2084	12.6163	1.41643	3.3792	1.21408	100	4.79563			0.714286	25.2294	9.3	1.87		27		280	370			160			36.4	1610	28.7	164	20.5		1155	55	106		54.5	10.2	2.81	7.9		5.3
Pan de Azucar	Arc Rear	PDA 09A	18	48.8732	1.33401	16.4932	10.5407	9.47954	0.192016	7.47852	10.4396	1.14199	3.89085	0.67711	100	5.03284			0.84898	23.8462	10.7	1.9		23		270	224			100			46.3	1435	24.5	165	20.8		1120	46.5	85		40	8	2.28	6.3		4.5
Pan de Azucar	Arc Rear	PDA 09B	18	49.3685	1.18218	17.9852	10.3365	9.29575	0.212186	4.41548	10.579	2.25321	3.66778	1.04072	100	5.92099			0.766197	36.5385	11.7	3.88		14.5		260	22			24			80	2260	35.5	321	27.2		1370	95	182		87	15.8	4.18	11.2		6.8
Pan de Azucar	Arc Rear	PDA 09D	18	57.0752	0.886918	17.9399	7.80085	7.01471	0.110865	3.0639	6.66196	2.32816	4.39428	0.524088	100	6.72243			0.681818	27.0833	11.9	1.72		14		174	16			17			56	1340	17.6	154	12		1850	39	70		34	6.45	1.8	4.85		3.25
Pan de Azucar	Arc Rear	PDA 10A	18	48.7724	1.37415	17.8236	10.5082	9.45741	0.191977	5.62797	11.842	1.43478	2.9807	0.4951	100	4.41548			0.65098	17.2093	9.3	1.48		28		295	84			42			26.8	1240	25.5	134	16.6		960	37	70		34.5	6.9	2	5.7		4.55
Pan de Azucar	Arc Rear	PDA 10B	18	55.7526	0.805964	18.6278	7.43502	6.6895	0.161193	2.8914	6.99174	2.38767	5.08765	0.604473	100	7.47532			1.0404	36.9048	13.8	2.2		8.5		147	18			18			46.5	1550	19.8	200	20.6		1640	62	108		46	7.45	2	5.5		3.55
Pan de Azucar	Arc Rear	PDA 10C	18	47.436	1.50703	17.5989	11.5202	10.3773	0.202286	5.5932	12.8148	1.14291	2.77132	0.556286	100	3.91423			0.664062	15.0463	9.2	1.46		33		336	112			40			42.5	1220	25.6	122	17		752	32.5	64		33.5	6.8	2.03	5.75		4.6
Pan de Azucar	Arc Rear	PDA 11	18	60.4083	0.522928	19.0869	5.58126	5.0181	0.140788	1.02574	4.77675	2.88616	5.82261	0.311746	100	8.70877			0.909091	35.5705	17.5	3.32		3		64	2			1			70.5	1690	33	278	30		2200	106	160		75	11.9	3.02	8.5		5.8
Pan de Azucar	Arc Rear	PDA 12A	18	50.6462	1.23183	18.5077	9.80412	8.82472	0.201939	4.19023	9.5416	1.58522	4.50323	0.767367	100	6.08845			0.863309	25	8.7	2.02		16.5		222	21			21			34.5	1470	27.8	173	24		1280	59	111		52	9.15	2.56	7.1		5
Pan de Azucar	Arc Rear	PDA 13	18	56.2374	1.04796	15.7195	7.6179	6.85208	0.110842	5.45143	7.37606	3.06328	3.59734	0.544135	100	6.66062			0.486239	38.9937	15	2.38		16.5		196	195			84			84	1375	21.8	253	10.6		1400	62	118		60	10.4	2.48	7.4		4.2
Conos de Puyo/Mera	Arc Rear	MER1B	9	54.5984	1.04395	16.8075	8.22629	7.40202	0.125273	6.68125	7.7774	1.49284	3.67469	0.396699	100	5.16753			0.70625	21.8519				20		187	5285		30	132			34	865	16	135	11.3		760	29.5	56	28	4.85	1.46	4.15			2.95
Conos de Puyo/Mera	Arc Rear	MER1C	9	57.5385	1.25801	16.2098	7.83679	7.05154	0.113427	4.48553	6.34161	2.27886	4.24837	0.474332	100	6.52722			0.731707	21.9101				19		21	125		22	70			54	770	20.5	195	15		1000	39	76	35.5	6.45	1.71	5.35			3.75
Conos de Puyo/Mera	Arc Rear	MER2	9	52.4706	1.23219	16.1211	10.4736	9.42412	0.164291	7.26989	8.31725	1.13977	3.47065	0.390192	100	4.61043			0.634146	17.0886				20		191	292		44	194			20.5	750	20.5	122	13		630	27	51	27	5.2	1.57	4.75			3.55
Conos de Puyo/Mera	Arc Rear	MER5	9	53.8892	1.10437	16.7189	8.94745	8.05091	0.132934	6.28878	8.38504	1.30888	3.70169	0.419252	100	5.01057			0.655556	20.3448				20		220	200		32	112			37	888	18	130	11.8		770	29.5	55.5	28	5.45	1.51	4.7			3.25
Conos de Puyo/Mera	Arc Rear	MER6	9	53.9439	1.14053	17.4676	8.88791	7.99734	0.133575	5.93897	8.0659	1.38713	3.54489	0.380176	100	4.93202			0.8	20.8955				17		220	200		30	90			27	872	17.5	145	14		700	28	56	28.5	5.5	1.55	4.55			3.25
Conos de Puyo/Mera	Arc Rear	PUY 09A	9	43.5051	1.96416	16.7865	12.5342	11.2787	0.161993	13.7187	9.27407	1.47818	0.566974	1.26557	100	2.04516			0.634021	27.2727	3.9	4.1		33		475	495			258			18.6	920	19.4	345	12.3		1850	42	86		45	8.2	2.16	5.95		3.75
Conos de Puyo/Mera	Arc Rear	PUY-09E	9,1	43.019	1.98042	16.7235	12.8067	11.5194	0.176037	14.6331	8.91187	1.46331	0.473099	1.10023	100	1.93641			0.633796	25.2909	3.84			37.24		537.29	655.19	1201.78	56.51	291.57	116.37	89.22	21.86	533.98	20.89	382.91	13.24	0.06	1117.57	41.73	88.16	11.12	44.78	7.77	2.21	5.91	0.75	3.9	0.73
Conos de Puyo/Mera	Arc Rear	PUY 10A	9	46.7887	1.81046	15.5052	11.3988	10.2559	0.192172	11.9955	8.32406	2.59937	1.44634	1.08223	100	4.04572			0.627027	26.8966	6	4.08		31		410	415			235			19.9	1090	18.5	336	11.6		2200	39	78		40.5	7.6	1.98	5.4		3.5
Conos de Puyo/Mera	Arc Rear	PUY 10B	9	45.6339	1.8719	15.6531	11.8891	10.7053	0.172013	12.8706	8.37802	2.48912	1.13326	1.09279	100	3.62238			0.620321	26.8966	6.25	4		31.5		430	440			238			26.3	1090	18.7	330	11.6		2150	39	78		41.5	7.5	2.05	5.4		3.55
Conos de Puyo/Mera	Arc Rear	PUY 11A	9	54.9097	0.958724	17.0552	9.07256	8.1643	0.151378	5.63124	7.87163	1.50368	3.48168	0.27248	100	4.98537			0.292079	16.3399	9.2	1.13		21		212	148			80			34	685	20.2	103	5.9		680	25	42.5		23.2	4.85	1.29	4.3		3.35
Conos de Puyo/Mera	Arc Rear	PUY 13B	9	49.4141	1.58586	13.6364	10	9	0.151515	10.7677	9.53535	2.82828	2.16162	0.919192	100	4.9899			0.630952	27.2059	5.9	3.73	2.1	28		485	355			225			186	2400	16.8	288	10.6		3100	37	73		38	6.8	1.84	4.7		3.25
Conos de Puyo/Mera	Arc Rear	PUY 13C	9	47.1326	1.78012	14.9287	11.3078	10.175	0.161829	11.8843	8.29372	3.34783	1.23394	1.062	100	4.58177			0.617978	26.9504	6.2	3.69		31		540	355			240			40	997	17.8	320	11		2140	38	76		40	7.1	1.92	5.05		3.4
Conos de Puyo/Mera	Arc Rear	PUY 14B	9	50.2877	1.66549	13.3946	9.59927	8.64036	0.141314	9.64974	8.98355	4.20915	1.98849	1.03967	100	6.19764			0.588957	27.5194	5.9	4.4		27		530	445			155			188	2580	16.3	360	9.6		3500	35.5	72		38	6.75	1.76	4.6		3.05
Conos de Puyo/Mera	Arc Rear	PUY 15B	9	57.0824	1.01825	17.3606	8.16615	7.34953	0.110898	4.56699	6.94626	1.42151	3.85119	0.292368	100	5.27271			0.434524	19.5122	10.4	1.22		14.5		186	108			59			29.3	705	16.8	127	7.3		620	24	44		25	5.1	1.37	4.2		3.2
Conos de Puyo/Mera	Arc Rear	PUY 16	9	44.4928	1.93359	16.6026	12.2899	11.065	0.1721	13.5453	8.15955	2.13606	0.931363	0.961733	100	3.06742			0.52521	25.4601	6.85	4.28	1.4	33		545	506			260			27	425	23.8	351	12.5		785	41.5	85		48	8.5	2.28	6.35		4.15
Conos de Puyo/Mera	Arc Rear	PUY 17C	9	52.7921	1.07038	17.3079	9.8657	8.8761	0.151469	6.27083	8.68424	1.34303	3.23134	0.272645	100	4.57437			0.384146	12.5	8.1	1		20.5		240	188			91			30	710	16.4	103	6.3		615	16	32		19	4.3	1.25	4.05		3.2
Conos de Puyo/Mera	Arc Rear	PUY 18A	9	45.6284	1.68994	14.997	11.9713	10.7772	0.182149	13.7523	8.89496	2.09472	1.07266	0.910747	100	3.16738			0.678756	25.3425	6	2.88		32		295	425			330			12.4	990	19.3	250	13.1		2210	37	74		38	7.1	1.91	5.1		3.65
Conos de Puyo/Mera	Arc Rear	PUY 18B	9	47.1939	1.5674	14.0257	11.1235	10.0111	0.18202	12.9336	9.64708	2.01234	1.54717	0.879765	100	3.55951			0.694444	25	7.2	2.81	3.7	30		350	440			325			15.8	1560	18	230	12.5		2600	35.5	71.5		35.5	6.65	1.84	4.85		3.5
Conos de Puyo/Mera	Arc Rear	PUY 13D	9	46.3686	1.86122	15.699	11.5112	10.3581	0.161845	12.0069	8.31479	2.99413	1.1228	1.11268	100	4.11693			0.694118	27.027	5.6	3.4		30.5		515	360			211			35	890	17	335	11.8		1765	40	80		41.5	7.1	1.97	5.3		3.5
Conos de Puyo/Mera	Arc Rear	PUY 14A	9	50.3079	1.64563	13.3165	9.55073	8.59162	0.141343	9.78294	9.11661	3.99798	2.02928	1.07017	100	6.02726			0.601227	26.9231	5.4	4.1		27.5		542	450			154			250	2570	16.3	357	9.8		3550	35	71		38	6.4	1.78	4.7		3.1
Conos de Puyo/Mera	Arc Rear	PUY 17A	9	44.8866	1.84285	16.0186	12.6873	11.4216	0.18226	13.0822	9.33576	1.52896	0.830296	0.870798	100	2.35925			0.70202	21.3333	6.7	2.65		30.5		414	448			250			15.4	720	19.8	245	13.9		1820	32	66		36.5	6.8	1.96	5.5		3.85
Conos de Puyo/Mera	Arc Rear	PUY 19A	9	45.4389	1.96416	16.3612	12.2709	11.0459	0.172117	12.5443	7.79589	2.85512	0.971955	0.850461	100	3.82707			0.656566	25.625	6	4.95		31.5		245	525			230			26.5	1060	19.8	340	13		1700	41	83		44.5	7.9	2.12	5.8		3.9
Conos de Puyo/Mera	Arc Rear	PUY 19B	9	44.9382	1.96396	16.1875	12.3912	11.1561	0.182223	12.9378	8.03806	2.72322	0.911116	0.961733	100	3.63434			0.686486	26.1438	6.2	4.95		32.5		246	554			245			25.5	965	18.5	347	12.7		1550	40	82		45	7.8	2.13	5.6		3.75
Conos de Puyo/Mera	Arc Rear	PUY 20A	9	49.5506	1.5756	14.5036	10.0798	9.07989	0.1414	9.67579	9.40309	3.2522	2.0503	0.767599	100	5.30249			0.540541	17.2297	5.5	3.1		29.5		467	410			198			59.5	1635	18.5	241	10		2200	25.5	50		27.5	5.45	1.62	4.7		3.4
Conos de Puyo/Mera	Arc Rear	PUY 21A	9	57.346	0.907533	17.3036	8.16779	7.35101	0.211758	3.69063	7.30059	1.58314	3.98306	0.322678	100	5.5662			0.463158	13.4375	10.5	1.32		16.5		179	84			38			34.5	800	19	132	8.8		785	21.5	43		23.5	4.85	1.36	4.15		3.3
Conos de Puyo/Mera	Arc Rear	PUY 21B	9	58.4702	0.896906	18.3009	7.60859	6.84269	0.100776	3.00312	6.05664	1.88451	4.13181	0.312406	100	6.01633			0.464706	15.5172	12.1	1.31		12		165	11			12			49	731	17	146	7.9		822	22.5	44		23.5	4.7	1.28	4.2		3
Conos de Puyo/Mera	Arc Rear	PUY 22A	9	55.9213	1.01969	18.2332	9.44977	8.51085	0.131247	3.29127	7.09743	1.68602	3.83645	0.27259	100	5.52246			0.355556	13.0556	9.6	1.17		16.7		220	20			30			36.5	802	18	118	6.4		850	18.8	36.5		21	4.4	1.29	4.1		3.15
Conos de Puyo/Mera	Arc Rear	PUY 23	9	54.0418	0.968816	16.5203	9.12302	8.21475	0.151378	6.96337	8.39641	1.31194	3.17893	0.252296	100	4.49087			0.241667	8.87097	6.8	0.94		21		217	236			141			25.5	650	24	106	5.8		580	16.5	32.5		19	4	1.26	4.25		3.55
Conos de Puyo/Mera	Arc Rear	PUY 24B	9	45.1205	1.76149	15.408	12.381	11.146	0.182223	14.5778	8.52399	1.78174	0.708645	0.789634	100	2.49038			0.692308	25	5.9	2.92		33		380	485			325			14.3	610	19.5	252	13.5		1430	38.5	75		39.5	7.1	2.03	5		3.8
Conos de Puyo/Mera	Arc Rear	PUY 24C	9	46.1453	1.66936	14.6196	11.6451	10.4816	0.171995	13.537	8.90328	2.49899	1.08256	0.890328	100	3.58155			0.684211	24.1611	5.6	2.8		31		390	445			308			21.3	892	19	244	13		1950	36	72		37.5	6.9	1.9	5.3		3.6
Conos de Puyo/Mera	Arc Rear	PUY 25A	9	45.9126	1.6896	14.8928	11.7463	10.5726	0.171995	13.4257	9.0348	2.24605	1.13314	0.92068	100	3.3792			0.666667	24.5033	7.3	2.87		30.5		409	440			310			13.4	890	19.5	245	13		2300	37	73.5		38	6.8	1.9	5.2		3.65
Conos de Puyo/Mera	Arc Rear	PUY 25C	9	45.1979	1.73059	15.2819	12.0939	10.8896	0.172047	13.9864	8.62261	2.35806	0.850116	0.910839	100	3.20818			0.666667	24.6711	5.5	2.99		31		351	450			310			22.5	760	19.8	250	13.2		1765	37.5	73		39	7.3	1.97	5.3		3.85
Conos de Puyo/Mera	Arc Rear	PUY 25D	9	46.9262	1.6178	14.2467	11.2538	10.1314	0.171891	13.0839	9.48433	2.00202	1.46613	0.869565	100	3.46815			0.682796	25.3571	6.5	2.7		29.5		350	450			305			16.6	1412	18.6	237	12.7		2690	35.5	70		36.5	6.7	1.88	5.05		3.55
Conos de Puyo/Mera	Arc Rear	PUY 26A	9	50.2274	1.55634	13.6433	10.571	9.50985	0.141486	9.61091	8.97423	3.53714	2.02122	0.778171	100	5.55836			0.578947	17.3913	5.6	3.16		28		476	360			196			68.5	1670	17.1	257	9.9		2410	24	49		26.5	5.05	1.51	4.35		3.15
Conos de Puyo/Mera	Arc Rear	PUY26A	9	50.2254	1.5573	13.6444	10.571	9.51183	0.144385	9.61192	8.9725	3.53743	2.02139	0.773491	100	5.55882			0.578947	17.3913				28		476	360		52	196			68.5	1670	17.1	257	9.9		2410	24	49	26.5	5.05	1.51	4.35			3.15
Conos de Puyo/Mera	Arc Rear	PUY 27A	9	54.6446	0.999596	17.811	9.76373	8.78433	0.171648	4.54362	8.03716	1.43376	3.32189	0.252423	100	4.75565			0.324074	9.06736	7.9	1.08		22.5		225	114			43			31	605	21.6	117	7		625	17.5	34.5		19	4.2	1.25	4.1		3.65
Conos de Puyo/Mera	Arc Rear	PUY 27D	9	42.7023	1.8029	16.2463	12.9748	11.6783	0.202573	14.3827	10.2603	1.22556	0.51656	0.982477	100	1.74212			0.75102	27.095	5.9	2.4		33		265	238			285			13.9	532	24.5	217	18.4		1120	48.5	94		50	9.6	2.67	7.3		4.7
Conos de Puyo/Mera	Arc Rear	PUY 27F	9	45.4867	1.71018	15.0374	11.9713	10.7772	0.182149	12.3153	10.0992	2.14531	1.34588	0.900627	100	3.4912			0.827273	26.25	6.5	2.36		30		309	310			280			24.3	1285	22	207	18.2		1675	42	81		42.5	8.15	2.24	5.9		4.15
Conos de Puyo/Mera	Arc Rear	PUY 28A	9	48.4484	1.69817	14.677	10.8157	9.73416	0.161731	11.3211	7.9248	3.79056	1.35449	0.889518	100	5.14505			0.567568	18.5811	7.5	3.35		30		453	370			225			73	985	18.5	280	10.5		2320	27.5	54		29	5.7	1.62	4.75		3.35
El Reventador	Arc Rear	REV-15BG	1	59.1561	0.747022	17.7165	6.76358	6.08722	0.111044	2.99818	6.1276	2.16031	4.51242	0.383606	100	6.67272			0.688034	27.1368	18.08			11.34		127.94	20.44	858.8	19.17	17.79	56.46	84.81	54.25	956.16	14.04	159.16	9.66	1.66	1225.46	31.75	61.23	7.21	27.65	4.8	1.42	3.76	0.47	2.55	0.49
El Reventador	Arc Rear	REV-15BP	1	61.825	0.615726	17.3615	5.9352	5.33966	0.111033	2.37206	5.19834	2.45281	4.39083	0.333098	100	6.84365			0.744977	28.3393	20.27			8.19		101.34	12.55	799.22	14.8	13.89	57.26	84.03	66.78	844.77	12.94	162.81	9.64	2.23	1372.38	31.74	59.71	6.81	25.23	4.28	1.26	3.32	0.44	2.29	0.44
El Reventador	Arc Rear	REV-31A	1	54.6261	0.917154	17.8895	8.41564	7.56904	0.141101	4.89821	7.81093	1.59242	4.1927	0.36283	100	5.78512			0.534694	20.3688	13.38			18.36		180.31	77.67	1074.43	28.33	46.51	75.1	87.38	34.12	960.67	17.15	141.93	9.17	0.87	936.56	28.72	57.18	6.98	27.77	5.1	1.55	4.23	0.57	3.08	0.58
El Reventador	Arc Rear	REV 15BP	10	61.8237	0.615714	17.3611	5.93508	5.34157	0.11103	2.37201	5.19824	4.39075	2.45276	0.333091	100	6.84351			0.692308	28.0702				8.3		110	16		16	15			65.5	820	13	160	9		1390	32	59		26	4.6	1.25	3.4		2.2
El Reventador	Arc Rear	15BG	10	59.1561	0.747022	17.7165	6.76358	6.08722	0.111044	2.99818	6.1276	4.51242	2.16031	0.383606	100	6.67272			0.657143	26.6667				10.8		136	24		19	19			54	910	14	154	9.2		1210	32	60		28	5	1.4	3.8		2.5
El Reventador	Arc Rear	REV 15F	10	59.4807	0.724638	17.7134	6.64251	5.97826	0.110709	2.90862	6.11916	4.40821	2.17391	0.382448	100	6.58213			0.644928	27.6316				10.3		132	19.5		19	18.5			54	915	13.8	159	8.9		1250	31.5	60		27.5	5.15	1.37	3.6		2.4
El Reventador	Arc Rear	REV 16A	10	58.943	0.754391	17.7533	6.96051	6.26446	0.120702	2.99745	6.186	4.50623	2.10224	0.372166	100	6.60846			0.642857	26.4706				10.7		144	26		21	25			51.8	890	14	155	9		1230	31.5	59		26.5	5.1	1.39	3.9		2.5
El Reventador	Arc Rear	REV 20	10	58.5521	0.767235	17.7675	6.99597	6.29637	0.121142	3.23046	6.41045	4.44189	2.03923	0.373522	100	6.48112			0.578231	23.8281				11.6		142	30		20	22			50.5	878	14.7	152	8.5		1160	30.5	58		28	5.2	1.43	4.2		2.75
El Reventador	Arc Rear	REV 19	10	56.955	0.839656	17.9059	7.58725	6.82853	0.131512	3.77339	6.89934	4.44107	1.85129	0.374305	100	6.29236			0.545455	22.4265				13.5		158	40		23	28			42.5	902	15.4	143	8.4		1050	30.5	58		28.5	5	1.51	4.1		2.75
El Reventador	Arc Rear	REV 47	10	58.0236	0.769597	17.9235	7.15928	6.44335	0.121515	3.41255	6.47069	4.43531	2.03538	0.364546	100	6.47069			0.6	23.0769				12		143	30		20	23			46	870	14.5	147	8.7		1120	30	59		27	5.05	1.43	4		2.75
El Reventador	Arc Rear	REV 31B	10	55.0814	0.907935	17.8762	8.31265	7.48139	0.141234	4.67082	7.66701	4.19668	1.61411	0.363174	100	5.81079			0.51875	20.438				16.2		179	69		25	40			34	902	16	131	8.3		910	28	55		28	5.4	1.46	4.4		2.95
El Reventador	Arc Rear	REV 54	10	54.0191	0.961013	17.6219	8.86155	7.9754	0.141623	5.32098	7.91066	4.08684	1.54774	0.414753	100	5.63457			0.509202	20.438				18		196	99		29	57			31	890	16.3	129	8.3		855	28	52		27	5.2	1.48	4.3		2.95
El Reventador	Arc Rear	REV 42A	10	56.6949	0.857486	17.8962	7.59632	6.83668	0.131145	3.92426	7.06165	4.42866	1.76541	0.403523	100	6.19407			0.6	25.4237				13.5		159	46		24	35			37	958	14	144	8.4		1072	30	56		28	1.9	1.45	4.05		2.65
El Reventador	Arc Rear	REV 50	10	55.7869	0.899462	18.1105	7.90314	7.11283	0.131382	4.17391	7.11485	4.50742	1.7585	0.404253	100	6.26592			0.592857	24.1379				14		166	52		24	37			35.5	968	14	138	8.3		990	28	56		23	5.4	1.48	3.9		2.65
El Reventador	Arc Rear	REV 49	10	55.8064	0.888862	18.2823	7.74724	6.97252	0.121208	4.08068	7.1715	4.53522	1.74742	0.393927	100	6.28264			0.6	24.1379				13.5		165	50		24	35			34.5	985	14	136	8.4		1000	28	55		26.5	5.1	1.51	4.2		2.65
El Reventador	Arc Rear	REV 58	10	55.4601	0.959693	17.7796	8.28367	7.4553	0.131326	4.34387	7.4755	4.32367	1.67694	0.393979	100	6.00061			0.559441	24.1667				14.5		184	62		27	42			32.5	935	14.3	134	8		960	29	54		28	5	1.48	4.2		2.7
El Reventador	Arc Rear	REV 62	10	54.2711	0.988581	17.855	8.756	7.8804	0.131138	4.88238	7.76742	4.23678	1.59383	0.393415	100	5.83061			0.537931	24.1379				15.5		195	69		30	50			31.5	944	14.5	128	7.8		880	28	52.5		28	5.1	1.51	4.2		2.75
Sumaco	Arc Rear	Sum A	11	45.0598	1.34673	16.2013	11.4421	10.2956	0.222767	6.22736	12.6572	2.77447	4.15157	1.06321	100	6.92604			0.661765	30.3644				26		310	70		36	24			93	2470	34	220	22.5		1300	75	150		75	15	3.9	11		6.55
Sumaco	Arc Rear	Sum GS9	11	54.2679	0.76219	19.4104	6.58532	5.92547	0.223576	1.85974	6.08735	4.32924	6.69711	0.436989	100	11.0263			1.35135	42.5				3.6		132	8		12	7			101	2600	37	385	50		2775	136	242		87	15.4	3.9	10		6.4
Sumaco	Arc Rear	SUM 02	1	54.2736	0.765126	19.41	6.58411	5.91966	0.221484	1.86248	6.09081	4.329	6.69486	0.4329	100	11.0239			1.35135	42.5				3.6		132	8			7			101	2600	37	385	50		2775	136	242		87	15.4	3.9	10		6.4
Sumaco	Arc Rear	SUM 04	1	45.0941	1.34534	16.2148	11.4	10.2569	0.222537	6.23103	12.6441	2.7716	4.15739	1.06211	100	6.92899			0.661765	30.3644	13.8	3.04	14.8	26		310	70			24			93	2470	34	220	22.5		1300	75	150		75	15	3.9	11		6.55
Sumaco	Arc Rear	SUM 05	1	44.9904	1.69851	15.0945	11.0403	9.93833	0.192094	7.1378	13.5173	2.99262	3.28582	1.15256	100	6.27843			0.637681	35.5372	11.1	3	6.4	27.5		304	110			32			82	2100	34.5	408	22		1185	86	176		92	18	4.6	12.8		7.3
Sumaco	Arc Rear	SUM 11D	1	47.4433	1.059	21.7448	8.53253	7.67524	0.302572	1.765	6.77761	3.08623	9.5411	0.605144	100	12.6273			1.62791	48.8235				1.6		195	2.5			2.5			82	3800	43	340	70		2300	166	295		116	16.8	4.64	11.9		7.25
Sumaco	Arc Rear	SUM 14	1	46.6073	1.33482	17.8481	11.0628	9.95045	0.222469	4.83365	11.2145	2.84154	4.15613	0.991	100	6.99767			0.628571	46.5385	11.2	2.67	6.4	17		280	12			17			58	2320	35	230	22		1920	121	222		107	18	4.64	12		6.6
Sumaco	Arc Rear	SUM 15	1	46.3023	1.3336	18.2158	10.2243	9.20388	0.242473	4.86967	9.9212	3.37442	5.54658	0.990099	100	8.92099			1.22973	40	17.8	3.5	15.5	11.7		270	95			42			93	2700	37	270	45.5		2000	116	208		93	15	4.02	10.8		6.65
Sumaco	Arc Rear	SUM 17	1	53.8299	0.764972	19.3961	6.56266	5.9084	0.231505	1.88223	6.2003	4.39859	6.92501	0.46301	100	11.3236			1.44444	45.1613				3.4		130	7.5			6.5			105	2500	36	360	52		2905	140	234		93	14.5	3.8	10.1		6.45
Sumaco	Arc Rear	SUM 20B	1	47.8243	1.12065	18.314	9.56083	8.60172	0.252398	4.25038	9.05603	3.51338	5.95659	1.11055	100	9.46996			1.39189	47.9452	18.6	4.26	17.7	6.5		225	40			40			86.5	2910	37	315	51.5		2520	140	237		99	15.7	4.28	11.1		6.8
Sumaco	Arc Rear	SUM 26	1	52.0699	0.979402	18.5077	9.72334	8.74394	0.212036	3.45315	8.68336	2.22132	4.2912	0.838045	100	6.51252			0.754098	39.3013				9		195	10			13			39	2400	30.5	250	23		2140	90	160		75	12.5	3.52	9.2		5.5
Sumaco	Arc Rear	SUM 28A	1	48.405	1.10034	18.3121	9.44882	8.4999	0.242277	4.23985	8.84313	2.70543	6.61215	1.03977	100	9.31759			1.34247	44.2177	20.2	3.65	14.6	6.5		195	43			38			59	2830	36.5	312	49		2510	130	231		97	15.4	4.14	10.7		6.45
Sumaco	Arc Rear	SUM 32	1	45.9298	1.55729	17.0695	11.174	10.0516	0.202245	6.29993	10.8707	2.46739	4.51006	1.04156	100	6.97745			0.896552	34.5622	9.7	2	7.6	16.5		268	120			72			69	1900	29	205	26		1370	75	144		72	12.3	3.4	9.1		5.75
Sumaco	Arc Rear	SUM 35A	1	47.2141	1.47639	20.7099	11.0729	9.96056	0.242694	3.67075	9.38416	1.3247	4.80332	1.21347	100	6.12802			1.22727	42.6923				6		242	9			13			120	2630	33	260	40.5		2000	111	200		91	14.9	3.95	10.3		6.45
Sumaco	Arc Rear	SUM 36	1	45.814	1.49646	17.2093	10.9808	9.87867	0.212336	5.18706	10.8392	3.10415	5.07583	1.18301	100	8.17998			0.984615	38.6555	13.1	2.6	9.8	13.5		268	56			30			73	2200	32.5	240	32		1680	92	174		85	14	3.9	10		6.3
Sumaco	Arc Rear	SUM-24B	1	54.4973	0.743608	19.6088	6.49893	5.847	0.234287	1.71132	5.85719	4.26811	6.80452	0.427829	100	11.0726			1.50735	46.1194	25.8			3.85		117.65	4.47	1609.39	11	5.01	26.47	107.47	113.11	2547.88	37.39	412.8	56.36	3.33	2983.02	142.97	255.2	26.16	90.7	13.74	3.79	9.83	1.27	6.39	1.2
Sumaco	Arc Rear	SUM-37	1	44.056	1.62527	13.9834	11.704	10.5285	0.204436	10.6307	13.2884	1.54349	3.20965	0.930185	100	4.75314			0.72805	28.4087	7.47			31.14		306.93	441.55	1485.55	49.81	175.85	108.96	92.11	82.49	1597.58	30.41	181.73	22.14	1.48	1094.58	59.09	124.25	15.44	62.53	11.43	3.27	9.19	1.17	5.89	1.05
Sumaco	Arc Rear	GS3	3	54.1308	0.760152	19.7439	6.77135	6.09122	0.220044	1.67033	6.0112	4.31086	6.61132	0.45009	100	10.9222			1.54286	39.9408				4		132				9			106	2542	35	403	54	2.57	2806	135	237		87.6	14	3.65		1.08
Sumaco	Arc Rear	3D2	3	47.5552	1.28987	18.8881	9.989	8.9891	0.319968	2.48975	8.62914	4.42956	6.76932	0.639936	100	11.1989			1.67347	37.045				1		292				4			125	4059	49	441	82	2.21	2563	173	302		121	18.5	5.03		1.59
Sumaco	Arc Rear	E05048	8	48.2799	1.28596	19.4951	9.42348	8.48113	0.339492	2.47932	8.64162	4.1665	6.27546	0.555533	100	10.442			1.67742	38.4048				3.8		274	10			4			131.2	4033	49.6	580	83.2	2.05	2649	161.3	304	34.4	126.3	19.4	5.3	13.6	1.7	9	1.7
Sumaco	Arc Rear	E05049	8	48.1385	1.15164	20.0281	9.0456	8.14104	0.314084	2.48126	9.74706	2.57548	6.93078	0.492064	100	9.50626			1.33333	38.7083				16.7		241	4			24			93.9	4743	49.5	639	66	1.98	2845	92.9	177.6	20.6	81.2	13.1	3.6	9.9	1.1	6.1	1.1
Sumaco	Arc Rear	E05050	8	45.5153	1.60352	18.1629	11.348	10.2132	0.215858	5.47869	11.6769	1.6138	5.13949	0.380322	100	6.75328			1.21753	39.3333				41.6		242	15			14			53.6	2747	30.8	347	37.5	1.04	2508	94.4	176	21	79.2	13.1	3.7	10.5	1.3	6.1	1.1
Sumaco	Arc Rear	E05051	8	51.7918	0.934944	20.5071	7.06859	6.36173	0.205482	2.25003	7.35627	3.07196	7.01722	0.503432	100	10.0892			1.57764	46.7692				5.7		133	4			5			78.5	3463	32.2	505	50.8	2.01	3121	121.6	215.3	22.6	81	12	3.2	8.7	1	5.8	1.1
Sumaco	Arc Rear	E05052	8	54.3201	0.76408	19.7857	6.37404	5.73663	0.211127	1.80966	6.20312	4.18233	6.44441	0.542899	100	10.6267			1.55988	44.1667				4.9		101	7			6			109.5	2727	33.4	522	52.1	2.55	3170	132.5	228.6	24.4	86.5	13	3.5	9.1	1.1	6	1.1
Sumaco	Arc Rear	E05053	8	54.5563	0.786433	19.8423	6.43262	5.78936	0.211732	1.83501	6.08981	4.10357	6.26122	0.524289	100	10.3648			1.55588	43.9667				4.8		106	16			6			111.5	2688	34	530	52.9	2.62	3146	131.9	226.2	24.1	83.6	13	3.5	8.8	1.1	5.8	1.1
Sumaco	Arc Rear	E05054	8	48.3754	1.1404	18.5112	9.45923	8.5133	0.23419	4.36815	8.98066	3.51284	5.84456	0.51929	100	9.3574			1.46045	44.5862				7.5		200	36			38			80.2	3017	35.4	475	51.7	1.88	2727	129.3	230.2	24.7	92.3	14.3	3.9	10.4	1.2	6.6	1.2
Sumaco	Arc Rear	E05056	8	54.4082	0.764895	19.7464	6.34058	5.70652	0.211353	1.81159	6.15942	4.16667	6.48148	0.543478	100	10.6481			1.57558	44.9286				5		103	6			4			112.3	2692	34.4	532	54.2	2.46	3234	125.8	219.9	23.2	81	12.4	3.5	9	1	5.8	1
Sumaco	Arc Rear	E05057	8	54.468	0.776962	19.7469	6.4175	5.77575	0.221989	1.82636	6.17533	4.14716	6.32669	0.534792	100	10.4738			1.57478	48.3077				5.1		106	6			5			112.1	2694	34.1	530	53.7	2.47	3211	125.6	218.8	22.8	81.4	12.3	3.3	8.6	1	5.9	1
Sumaco	Arc Rear	E05058	8	47.7549	1.41624	19.5523	10.1175	9.10573	0.213965	3.56608	8.99671	3.37249	5.5529	0.468685	100	8.92539			1.30599	40.08				7.7		218	7			8			101.8	2646	31.7	398	41.4	1.62	2201	100.2	189.1	21.4	80	12.8	3.6	8.9	1.1	5.8	1
Sumaco	Arc Rear	E05059	8	45.5546	1.67887	17.2391	11.3119	10.1807	0.20474	5.5075	11.8237	3.35773	4.0129	0.44019	100	7.37063			0.88169	45.2273				18.8		284	37			17			143.6	2612	35.5	541	31.3	2.3	2111	99.5	199.6	23.2	92.1	15.6	4.3	11.4	1.3	7	1.2
Sumaco	Arc Rear	E05060	8	46.8961	1.35961	18.9006	10.2279	9.20515	0.247201	4.66592	9.64084	3.35781	5.25302	0.473802	100	8.61083			1.32	38.7586				11.2		225	61			32			97.9	2851	35	418	46.2	1.56	2169	112.4	208.9	23.5	86.7	14.3	3.8	9.6	1.2	6.6	1.2
Sumaco	Arc Rear	E05062	8	54.6609	0.764417	19.8239	6.27841	5.65057	0.214037	1.73268	6.0338	4.26035	6.31918	0.540188	100	10.5795			1.58651	47.4074				4.6		114	7			4			122.5	2637	34.1	530	54.1	2.46	3165	128	225.4	23.2	81.8	12.4	3.2	8.2	1	5.8	1
Sumaco	Arc Rear	E05063	8	54.5728	0.786671	19.808	6.43457	5.79111	0.221882	1.86582	6.17234	4.26618	5.9908	0.524447	100	10.257			1.58017	47.3333				4.3		108	6			3			112.2	2740	34.3	534	54.2	2.59	3134	127.8	221.7	23.3	83.4	12.5	3.4	8.9	1	5.8	1.1
Sumaco	Arc Rear	GS4†	4	54.1391	0.78172	19.4328	0	6.31389	0	1.7739	6.32391	4.12908	6.6346	0.471036	100	10.7637			1.41406	46.6887				5		122				24			106	2597	38.4	359	54.3	2.79	2797	141	230	23.9	85.6	14.8	4.15	10.4	1.35	7.16	1.31
Sumaco	Arc Rear	3D3†	4	43.3397	1.72397	15.8565	0	11.6468	0	6.32455	14.2327	1.05242	4.44021	1.38318	100	5.49263			0.904535	37.3626				26		343	0			20	4	55	97.7	2582	41.9	231	37.9	1.7	1435	102	187	22	88.5	17.6	4.99	13.5	1.71	8.74	1.48
Sumaco	Arc Rear	GS5†	4	54.3395	0.771698	19.7134	0	6.52435	0	1.7739	6.10343	3.96873	6.34396	0.461014	100	10.3127			1.424	46.1794				5		128	0			9	1	58	108	2560	37.5	353	53.4	2.84	2800	139	227	23.5	84.2	14.5	4.12	10	1.32	7	1.28
Sumaco	Arc Rear	SU-400-C-10	12	53.0054	0.784398	19.2751	8.77382	7.89468	0.226687	1.87539	6.24194	3.98881	6.24516	0.46249	100	10.234			1.47533	48.3073				5.42701									105.121	2570.02	35.247	364.38	52.001	2.85682	2902.65	146.389	247.229	26.3162	91.424	14.8455	4.11629	10.2472	1.35884	7.11322	1.30728
Sumaco	Arc Rear	SU-401-L-10	12	54.6494	0.793827	19.7573	5.71814	5.14519	0.233446	1.91827	6.37134	4.08801	6.57381	0.469412	100	10.6618			1.46238	47.9857				5.46362									104.868	2537.71	35.3942	363.342	51.7598	2.88451	2840.89	143.713	244.65	26.1081	90.9519	14.7354	4.09912	9.99883	1.35579	7.04449	1.2962
Sumaco	Arc Rear	SU-402-L-10	12	53.0294	0.763342	19.2771	8.84762	7.96109	0.222996	1.79295	6.09249	4.01662	6.39325	0.450831	100	10.4099			1.46838	48.4262				5.33855									105.919	2547.2	35.5516	366.234	52.2034	2.81782	2850.14	145.356	247.316	26.1034	90.7847	14.6121	4.05269	10.0742	1.3618	7.04384	1.31284
Sumaco	Arc Rear	SU-403-L-10	12	55.1905	0.791044	20.0575	4.35508	3.9187	0.230854	1.85438	6.38732	4.23717	6.86126	0.471258	100	11.0984			1.4655	48.5387				5.33371									105.939	2552.53	35.2947	364.933	51.7245	2.79423	2851.26	145.524	245.281	26.077	91.0009	14.659	4.07171	10.0391	1.34139	7.01221	1.29228
Sumaco	Arc Rear	SU-404-L-10	12	53.4723	0.76966	19.3682	8.02196	7.21816	0.227806	1.83971	6.1829	4.10855	6.35564	0.45712	100	10.4642			1.47608	47.7733				5.41854									105.885	2527.83	35.6431	367.455	52.6121	2.80369	2852.14	145.768	246.151	26.3394	91.5308	14.7227	4.08693	10.1945	1.36754	7.06691	1.31091
Sumaco	Arc Rear	SU-405-L-10	12	53.4063	0.78818	19.3011	7.91124	7.11853	0.229789	1.88229	6.28624	3.98704	6.53673	0.463786	100	10.5238			1.47052	48.4534				5.38661									106.557	2563.29	35.5339	366.966	52.2533	2.80777	2904.84	146.367	247.726	26.2454	91.7855	14.8981	4.12405	10.0525	1.37327	7.0453	1.30118
Sumaco	Arc Rear	SU-406-L-10	12	54.9346	0.774788	19.8322	5.48872	4.93875	0.230939	1.8143	6.135	4.29862	6.5986	0.44221	100	10.8972			1.48092	48.0073				5.32162									98.2009	2538.64	34.9685	364.238	51.7856	2.88915	2901.61	145.024	246.266	26.0272	90.1063	14.4867	4.03655	9.86237	1.3372	6.98389	1.28623
Sumaco	Arc Rear	SU-01-L-10	12	51.0642	1.3909	20.5519	4.49088	4.0409	0.365844	2.67712	9.23977	2.64779	7.38053	0.641041	100	10.0283			1.62449	45.3595				3.99934									79.7316	4058.51	51.7671	371.082	84.095	2.4049	2771.64	194.549	345.246	37.769	131.296	21.0343	5.8438	14.5567	2.00506	10.6012	1.95833
Sumaco	Arc Rear	SU-14-L-10	12	53.4245	0.935565	21.1098	4.63657	4.17199	0.257219	1.96505	7.69628	4.25901	5.56231	0.61832	100	9.82132			1.39581	46.7525				5.9627									146.853	3691.98	37.9646	352.679	52.9913	2.68962	3238.38	148.995	256.502	27.778	97.3959	15.7443	4.35691	10.6892	1.45314	7.61207	1.39394
Sumaco	Arc Rear	SU-101-RF-10	12	47.3693	1.61907	20.9031	7.97076	7.17209	0.275054	5.16453	11.2505	1.75836	3.07598	1.41204	100	4.83434			1.1854	45.4267				13.0787									20.9257	2878.08	40.1857	299.462	47.6362	1.85084	2472.95	139.191	255.089	28.654	106.555	18.2955	5.07895	12.9693	1.69604	8.577	1.54373
Sumaco	Arc Rear	SU-06-L-10	12	48.66	1.62292	17.5367	6.06817	5.46014	0.21864	6.95916	12.0652	2.40369	4.09141	0.982129	100	6.4951			0.994279	29.6547				22.1065									43.5462	1739.48	27.3739	173.752	27.2173	0.839456	1351.94	62.8069	124.743	14.6451	57.396	10.8494	3.22853	8.39497	1.13263	5.88774	1.0959
Sumaco	Arc Rear	SU-07-L-10	12	47.3573	1.59058	16.9298	8.91443	8.0212	0.214797	6.87522	11.8538	2.28797	3.90805	0.961306	100	6.19602			0.993274	29.5024				22.2744									44.2331	1742.17	27.6408	176.355	27.4549	0.827792	1354.99	62.9145	125.227	14.6851	57.9936	11.015	3.29616	8.52217	1.14721	5.98139	1.08609
Sumaco	Arc Rear	SU-08-L-10	12	47.4676	1.58929	17.1329	8.57472	7.71553	0.211971	6.82297	11.7495	2.3412	3.99071	0.978287	100	6.33192			0.984246	29.8402				21.6721									42.8996	1792.47	27.4273	174.873	26.9952	0.855692	1380.16	64.0813	128.25	14.8972	58.2057	10.9999	3.25436	8.51369	1.16074	5.99303	1.09377
Sumaco	Arc Rear	SU-17-RF-10	12	43.6868	2.01438	22.5971	9.63062	8.66564	0.300599	6.28551	12.2615	1.07162	1.31449	1.8024	100	2.3861			0.930053	32.5716				17.089									5.70938	1338.72	42.0829	284.127	39.1394	0.117735	1477.44	100.322	207.653	25.0043	98.2569	18.5838	5.33959	13.7538	1.78948	9.18038	1.65066
Sumaco	Arc Rear	SU103-RF-10	12	44.1658	1.89638	15.6039	8.68709	7.81664	0.210825	7.61395	15.5394	2.35273	3.34306	1.4573	100	5.69579			0.808202	34.7093				28.7397									99.1535	2021.41	36.5292	218.718	29.523	1.30002	1308.44	88.4231	179.718	22.1955	89.3809	17.1174	4.85141	13.0621	1.69117	8.3544	1.4702
Sumaco	Arc Rear	SU-108-RF-10	12	46.285	1.89595	18.3672	8.29351	7.4625	0.236732	6.10934	12.3992	2.26862	3.46499	1.51052	100	5.73361			0.886538	42.4678				20.3476									109.474	2444.55	37.2903	437.796	33.0593	1.63602	1716.65	110.422	224.443	26.9662	104.866	19.0667	5.40248	13.7482	1.72828	8.54194	1.46057
Sumaco	Arc Rear	SU-110-RF-10	12	46.1171	1.48401	18.0772	9.71786	8.74413	0.235078	6.28491	12.9388	1.64288	3.23458	1.24137	100	4.87746			0.775143	33.6544				23.3962									107.009	2584.59	33.752	218.972	26.1627	2.37174	1407.86	82.4371	166.769	20.1279	80.2016	15.4187	4.40339	11.5658	1.51971	7.6278	1.32805
Sumaco	Arc Rear	SU-12-L-10	12	46.6006	1.45195	18.9599	8.83804	7.95247	0.247465	4.42057	10.5198	3.39031	5.22985	1.22711	100	8.62016			1.08756	37.8526				12.4172									107.736	2989.44	35.3584	256.202	38.4543	1.95395	1812.22	98.5242	193.66	22.6553	86.2552	15.6016	4.4441	11.4731	1.51161	7.68696	1.37918
Sumaco	Arc Rear	SU-16-RF-10	12	47.4759	1.77571	19.9311	4.98638	4.48674	0.266966	5.62778	12.6818	2.19298	4.06969	1.4913	100	6.26267			0.865917	34.4574				15.8472									163.435	2748.89	38.3963	250.062	33.248	2.19549	1705.52	94.4367	192.724	22.8811	89.9509	16.8415	4.80737	12.4394	1.61843	8.18808	1.47314
Sumaco	Arc Rear	SU-104-DF-10	12	44.3921	1.97765	17.4026	8.09299	7.28207	0.251434	7.4037	16.2863	0.72605	2.70979	1.56834	100	3.43584			0.963948	36.0124				25.642									406.288	2553.67	40.0942	244.771	38.6487	2.82802	1429.37	100.732	204.282	24.7882	98.356	18.4045	5.1614	13.8084	1.78731	9.0665	1.58149
Sumaco	Arc Rear	SU-106-AL-10	12	45.6104	1.74503	14.508	7.71937	6.94589	0.218288	11.4873	14.1521	1.42984	2.91489	0.988213	100	4.34473			0.797454	28.8815				29.7338									83.1427	1455.17	27.7389	164.806	22.1205	1.00677	1016.29	57.6555	121.237	15.1759	61.4281	11.8348	3.3906	9.15931	1.22222	6.20915	1.1082
Sumaco	Arc Rear	SU-02-L-10	12	45.041	1.78125	16.7754	8.90219	8.01019	0.24794	6.4141	14.6944	1.16877	4.4341	1.43291	100	5.60287			1.03582	37.274				22.4032									60.3482	2654.22	39.0957	240.929	40.4962	1.53699	1500.9	103.84	207.805	24.8696	97.5028	17.8336	4.97153	13.2525	1.71845	8.66945	1.54586
Azufral de Tuquerres	Colombia	TUQ1	1	69.6978	0.381482	15.7439	3.4952	3.14478	0.0824826	1.11352	3.58799	2.08269	4.04165	0.123724	100	6.12433			0.484211	18.75				5.6	2279	60	6		6	3			47.5	425	9.5	53	4.6		1380	15	27		14.5	2.8	0.72	2		1.65
Azufral de Tuquerres	Colombia	TUQ10	1	70.2688	0.370377	15.6382	3.30253	2.97143	0.0720178	1.05969	3.40541	2.08852	4.01242	0.113171	100	6.10094			0.505376	19.7403				5.2	2213	58	5		6	3			47	407	9.3	47	4.7		1270	15.2	27		14	2.7	0.71	2		1.65
Azufral de Tuquerres	Colombia	TUQ12	1	69.1049	0.422476	15.7925	3.7721	3.39392	0.0804715	1.25737	3.72181	2.03191	4.08393	0.110648	100	6.11584			0.441176	17.4419				6.5	2523	71	6.5		7	3.5			46	440	10.2	60	4.5		1230	15	28		14.2	2.8	0.76	2.1		1.75
Azufral de Tuquerres	Colombia	TUQ3	1	63.0796	0.644836	17.837	6.44836	5.80187	0.104006	2.36093	5.2211	1.51849	3.30739	0.124807	100	4.82587			0.341463	12.037				12	3841	134	16		14	9			34	442	12.3	75	4.2		905	13	24.5		14	2.95	0.83	2.55		2.15
Azufral de Tuquerres	Colombia	TUQ4	1	61.7372	0.676715	18.5524	7.03784	6.33224	0.124932	2.99837	4.9244	1.20768	3.27946	0.166576	100	4.48714			0.358333	11.1504				15.8	4028	155	32		17.5	11			13.8	402	12	75	4.3		1095	12.6	24.5		14	3.3	0.96	2.5		2.2
Azufral de Tuquerres	Colombia	TUQ8	1	69.4595	0.404316	15.9446	3.62848	3.2647	0.0829367	1.19222	3.42114	2.14599	3.97059	0.114038	100	6.11658			0.4375	18.7342				5.5	2415	62	4		7	3			46	422	9.6	52	4.2		1165	14.8	27		14	2.7	0.76	2		1.75
Galeras	Colombia	GAL12i	1	58.1531	0.75984	17.7296	7.7301	6.95511	0.121574	3.78907	7.14249	1.4285	3.73841	0.182362	100	5.16691			0.260606	9.35897				18.4	4520	178	37		25	26			33	505	16.5	110	4.3		692	14.6	29.7		16.2	3.65	1	3.1		2.8
Galeras	Colombia	GAL12s	1	58.2694	0.744721	17.662	7.66862	6.89979	0.130829	3.73367	7.34657	1.40893	3.62297	0.181148	100	5.0319			0.263473	9.49367				18.3	4431	177	37		24	24			33	504	16.7	113	4.4		715	15	30		16.4	3.55	1	3.4		2.85
Galeras	Colombia	GAL14	1	58.1319	0.739308	18.1687	7.76779	6.98902	0.131658	3.47373	7.04874	1.24568	3.87883	0.192423	100	5.12452			0.266667	8.9726				15.8	4398	170	19		23	17			27	545	15	100	4		675	13.1	26.7		14.8	3.5	1.02	3		2.65
Galeras	Colombia	GAL15	1	62.7651	0.673577	16.5843	6.47042	5.82172	0.112263	2.56163	5.44985	2.13299	3.72508	0.173497	100	5.85808			0.302083	10.7692				12.9	4012	131	20		17	13			56	423	19.2	152	5.8		955	19.6	39		21	4.25	1.02	3.9		3.35
Galeras	Colombia	GAL17	1	62.4217	0.629292	16.8488	6.34367	5.70768	0.111649	2.47657	5.78543	2.01982	3.81635	0.182698	100	5.83618			0.3	10.6742				12.5	3749	119	15		18	14			54	450	19	146	5.7		935	19	37.5		20.2	4.1	1.01	3.85		3.25
Galeras	Colombia	GAL17s	1	59.1284	0.617608	18.0726	7.59355	6.83224	0.141746	2.95642	6.81394	1.31621	3.89802	0.222744	100	5.21424			0.246914	9.375				12.2	3675	132	13		19	10			30	553	16.2	101	4		710	15	28		16	3.4	1.01	3.1		2.75
Galeras	Colombia	GAL29	1	58.5519	0.764595	17.7567	7.53528	6.77982	0.120725	3.53122	7.04232	1.46883	3.79279	0.191149	100	5.26162			0.278788	10.9272				16.3	4549	167	21		22	23			35	525	16.5	114	4.6		740	16.5	31.5		17.2	3.7	1.03	3.7		2.8
Galeras	Colombia	GAL35c	1	62.8902	0.630938	16.842	6.1262	5.51201	0.101764	2.41181	5.49526	2.12687	3.81615	0.172999	100	5.94303			0.3	11.0989				12.1	3759	119	16		17	14			55	440	19	150	5.7		955	20.2	38		20	4.2	1.01	3.7		3.2
Galeras	Colombia	GAL35d	1	63.1542	0.652627	16.5667	6.1347	5.51965	0.100404	2.47998	5.31138	2.21893	3.83544	0.160647	100	6.05437			0.365714	12.8205				12.6	3889	131	17		16	13			59	434	17.5	39	6.4		960	20	38.5		19.8	4.2	1.03	3.65		3.15
Galeras	Colombia	GAL35s	1	57.819	0.770236	17.7462	8.78069	7.90036	0.143777	4.07711	6.73699	1.43777	3.18364	0.184857	100	4.62141			0.25	8.36257				22.4	4577	215	40		24	21			34	430	18	110	4.5		660	14.3	27.3		15.3	3.5	0.95	3.3		3
Galeras	Colombia	GAL36c	1	61.411	0.655051	17.3486	6.81663	6.13321	0.122822	2.66115	5.84428	1.84233	3.78701	0.194468	100	5.62935			0.3	10.2273				12.5	3900	127	15		17	11			45.5	477	18	136	5.4		840	18	35		18.8	3.85	1.01	3.6		3.1
Galeras	Colombia	GAL36s	1	60.7431	0.686305	17.3932	7.10889	6.39618	0.112677	3.07301	5.98212	1.83356	3.59542	0.18438	100	5.42898			0.283333	9.76744				14.7	4085	144	25		18	17.5			46	470	18	135	5.1		810	16.8	33.5		18.2	4.05	0.98	3.5		3.05
Galeras	Colombia	GAL37	1	57.3446	0.748412	17.9518	8.01004	7.20698	0.141592	4.07581	7.64594	1.26421	3.44877	0.171933	100	4.71298			0.22093	8.14371				21.5	4451	195	35		23	21			30	488	17.2	96	3.8		640	13.6	26.5		15	3.3	0.98	3.15		2.9
Galeras	Colombia	GAL38	1	57.7683	0.98242	18.3692	8.28917	7.45812	0.14327	3.48964	6.58016	1.38153	3.61244	0.214904	100	4.99397			0.257692	9.20502				19.8	5841	196	26		19	9			29.5	481	26	116	6.7		838	22	36.5		22.7	5	1.44	4.7		4.25
Galeras	Colombia	GAL40	1	56.4915	0.796934	18.158	8.2518	7.4245	0.141229	4.22678	8.11057	1.12983	3.35923	0.161404	100	4.48906			0.205714	7.12644				25.6	4738	228	41		24	22			26.5	480	17.5	91	3.6		590	12.4	24		14	3.45	0.98	2.95		2.9
Galeras	Colombia	GAL42	1	58.9261	0.846903	17.3972	7.38744	6.6468	0.11224	3.79576	6.50993	1.58157	3.93861	0.244888	100	5.52017			0.4125	14.8921				16.2	5040	172	80		22	40			34.5	625	16	137	6.6		810	20.7	40		22	4.5	1.2	3.6		2.9
Galeras	Colombia	GAL43	1	59.9137	0.736933	17.4643	7.15734	6.43977	0.12114	3.2102	6.41031	1.66567	3.85628	0.18171	100	5.52195			0.306358	10.8642				15.3	4386	161	24		20	19			41	502	17.3	132	5.3		800	17.6	33.5		18.6	3.85	1.03	3.3		2.95
Galeras	Colombia	GAL44	1	59.7153	0.748971	17.4288	7.24681	6.52026	0.121455	3.25904	6.5788	1.64976	3.78534	0.192303	100	5.4351			0.298851	10.7362				15.6	4458	162	26		21	20			40	504	17.4	130	5.2		804	17.5	34		19	4	1.03	3.3		3
Galeras	Colombia	GAL45	1	61.9484	0.756466	16.7649	6.59352	5.93247	0.112448	3.03609	5.8575	1.70716	3.71077	0.173783	100	5.41793			0.360759	11.3816				15.3	4505	160	25		20	18			43	451	15.8	136	5.7		854	17.3	33		18	3.7	0.97	3.1		2.7
Galeras	Colombia	GAL46	1	58.7234	0.759354	17.7081	7.4923	6.74114	0.121497	3.50316	6.89494	1.46809	3.88789	0.19237	100	5.35598			0.302469	10.2614				17	4518	175	26		22	21			33	521	16.2	109	4.9		744	15.7	30.5		17.4	3.8	1.03	3.25		2.8
Galeras	Colombia	GAL47	1	59.6833	0.737084	17.6593	7.22752	6.50291	0.11261	3.17356	6.58257	1.59702	3.77756	0.174034	100	5.37457			0.319018	10.719				15.6	4387	166	22		21	21			39	500	16.3	126	5.2		780	16.4	31		16.8	3.75	0.99	2.95		2.75
Galeras	Colombia	GAL49	1	57.2886	0.779368	18.0672	8.09733	7.28552	0.141703	3.93733	7.60137	1.25509	3.47173	0.172068	100	4.72682			0.222222	7.94118				22	4635	208	33		25	23			27.5	500	18	97	4		646	13.5	26		15	3.35	0.98	2.95		2.95
Antisana	Main Arc	ANT-32	13	67.4587	0.614176	15.3544	4.20862	3.78574	0.0604108	1.3089	3.27225	3.9267	4.02739	0.191301	100	7.95409			0.803224	26.0519	32.16			6		75	13.6	445.37	9.01	9.44	37.55	71.56	177.6	451.37	17.99	289.77	14.45	9.4	1070.47	40.12	79.38	8.95	32.61	5.77	1.09	4.46	0.61	3.19	0.6
Antisana	Main Arc	ANT-47	13	56.9711	0.968202	17.3767	8.06156	7.25642	0.101916	4.9735	6.45128	1.61027	4.01549	0.275173	100	5.62576			0.531097	20.0357	11.97			14.52		175.14	165.04	783.15	29.18	77.59	46.05	94.7	37.98	779.41	14.31	141.45	7.6	1.31	721.11	22.44	46.21	5.73	23.35	4.58	1.33	3.86	0.51	2.72	0.51
Antisana	Main Arc	ANT 10	13	65.0286	0.673299	15.4256	4.97437	4.47191	0.0703447	2.47211	4.33122	3.2861	4.02975	0.211034	100	7.31585			0.705128	26.7176				9.6		110	48			27.5			128	655	15.6	147	11		940	35	64		29.5	4.9	1.09	3.9		2.7
Antisana	Main Arc	ANT 14C	13	65.7054	0.643087	15.3838	4.74277	4.2705	0.0703376	2.2508	3.98915	3.48674	4.01929	0.180868	100	7.50603			0.768212	26.1194				9.1		105	47			23			139	535	15.1	147	11.6		925	35	64		29	4.9	1.05	4		2.8
Antisana	Main Arc	Ant 26	11	63.1459	0.691598	16.0872	5.51274	4.96036	0.0801853	2.83656	5.09177	2.82653	4.07943	0.200463	100	6.90596			0.740385	38.961				9.8		122	73		16	30			98	638	10.4	158	7.7		1060	30	53.5		24.5	4.3	1.05	3.4		2
Antisana	Main Arc	Ant 54	11	54.9682	1.19855	18.7222	8.83417	7.94899	0.123988	3.74032	7.4393	1.47753	4.03995	0.340968	100	5.51748			0.569697	17.5				13.8		205	13.5		26	16			26.5	870	16.5	140	9.4		694	24.5	49		26.5	5.3	1.51	4.85		3.3
Antisana	Main Arc	Ant 29C	11	67.7313	0.641665	15.1759	4.34906	3.91328	0.0611109	1.3037	3.19814	3.81943	3.95184	0.203703	100	7.77127			0.774566	27.3973				5.9		87	15		9	9			165	436	17.3	252	13.4		1060	40	76		34	5.8	1.12	4.6		3.1
Antisana	Main Arc	ANT 03	13	58.0899	0.896635	16.0286	7.47532	6.7298	0.11082	5.45033	6.46786	2.2164	3.80818	0.201491	100	6.02458			0.517857	16.5278	18.7	1.38	12.3	17.3		170	210			91			81	586	16.8	148	8.7		620	23.8	45.5		24	4.9	1.12	3.5		2.95
Antisana	Main Arc	ANT 07B	13	60.1128	0.835599	16.2388	6.64452	5.98007	0.201349	4.46995	5.64784	2.51686	3.78536	0.211416	100	6.30222			0.591716	20.2703	19.6	1.55	14.1	15		139	136			71			94	600	16.9	152	10		705	30	58		26.8	5	1.16	4.3		2.95
Antisana	Main Arc	ANT 21D	13	58.021	1.01773	16.7775	7.56751	6.80169	0.0906892	4.15155	7.00322	2.07578	3.73841	0.322451	100	5.81419			0.725	30.3191	14.6	1.35	6.5	12.7		183	126			60			54	866	12	148	8.7		850	28.5	55		28.5	5.15	1.35	4.1		2.5
Antisana	Main Arc	ANT 28N	13	63.4114	0.71407	16.2627	5.74273	5.16947	0.0804586	2.8764	4.85769	2.66519	3.75138	0.211204	100	6.41657			0.740741	33.5366				10.2		130	79			36			96	597	10.8	156	8		1110	27.5	51		23.5	4.2	1.07	3.4		2.15
Antisana	Main Arc	ANT 29B	13	60.9965	0.845496	16.3764	6.5224	5.86814	0.0905888	3.43231	5.6467	2.78812	3.70408	0.251636	100	6.4922			0.619718	28.6364				12.3		150	79			38			97	715	14.2	167	8.8		1025	31.5	60		28.5	5.2	1.28	4.3		2.7
Antisana	Main Arc	ANT 36	13	59.3473	0.926672	16.4484	7.24214	6.51692	0.100725	4.02901	6.17446	2.21595	3.9585	0.282031	100	6.17446			0.615894	25	13.1	1.45	7.85	12.9		166	108			49			71	714	15.1	164	9.3		825	29	57		28	5.35	1.33	4.3		2.85
Antisana	Main Arc	ANT 37	13	60.0141	0.956601	16.5341	6.86738	6.18266	0.0906253	3.35314	6.04169	2.24549	4.27953	0.302084	100	6.52502			0.76378	30.5263	15.6	1.6	9.4	10.7		158	90			40			67	790	12.7	171	9.7		920	29	58		29	5.3	1.35	4.1		2.6
Antisana	Main Arc	ANT 38	13	59.0753	0.936745	16.5089	7.37309	6.63779	0.100725	4.00886	6.0838	2.29654	4.05923	0.292103	100	6.35576			0.633987	24.7863	9.5	1.46	9.2	13.5		170	110			51			71	715	15.3	167	9.7		855	29	57		28.5	5.5	1.3	4.25		2.9
Antisana	Main Arc	ANT 46	13	58.8052	0.926859	17.1872	7.50554	6.74995	0.090671	3.77796	6.35704	1.73282	4.11042	0.261938	100	5.84324			0.528	23.9583	10.9	1.34	7.5	13		167	94			43			43.5	716	12.5	133	6.6		728	23	45		24.5	4.7	1.28	4.2		2.6
Antisana	Main Arc	ANT 56	13	53.9409	1.13029	18.0442	9.12302	8.21475	0.131194	5.26794	7.63952	1.49359	3.81471	0.322939	100	5.30831			0.430693	20	12.2	1.24	2.4	17		193	60			60			29	850	20.2	130	8.7		720	32	54		36.5	6.8	1.78	5.9		4
Antisana	Main Arc	ANT 60	13	58.4584	1.08816	18.0756	7.46599	6.7204	0.110831	2.46851	5.86398	2.40806	4.46348	0.342569	100	6.87154			0.518135	17.052				13		169	4			8.5			66	735	19.3	189	10		960	29.5	57		30	5.7	1.51	4.7		3.6
Antisana	Main Arc	ANT 61	13	63.0266	0.683761	16.3901	5.48014	4.93715	0.0804424	2.92609	5.19859	2.39316	4.14279	0.221217	100	6.53595			0.594595	34.4828				11		129	99			34			77.5	722	11.1	138	6.6		1065	30	53		25	4.4	1.12	3.35		2.15
Antisana	Main Arc	ANT-8	13	62.1976	0.78629	16.129	5.89718	5.30242	0.0907258	3.04435	5.51411	2.34879	4.34476	0.241935	100	6.69355			0.778988	27.8889	19.86			12.14		131.21	50.82	656.28	17.5	24.22	39.1	71.26	63.33	802.17	12.85	125.76	10.01	2.76	865.34	27.61	53.33	6.3	24.33	4.39	1.19	3.53	0.46	2.4	0.43
Antisana	Main Arc	3.2An	3	58.2683	0.879824	15.6969	6.91862	6.91862	0.109978	5.45891	6.41872	2.29954	3.71926	0.229954	100	6.0188			0.544444	15.5625				20		167				91			84	580	18	171	9.8	2.41	661	24.9	59.3		23.5	4.82	1.13		0.49
Antisana	Main Arc	HHJAn	3	62.68	0.73	16.02	5.81	5.81	0.09	2.69	4.91	2.84	4.01	0.22	100	6.85			0.694118	19.6053				10		129				31			111	583	17	183	11.8	5.22	827	29.8	64.4		26.2	5.07	1.06		0.46
Antisana	Main Arc	3D1 An†	4	56.352	1.04115	15.6072	0	7.29803	0	5.26579	7.1779	2.99329	3.7241	0.540595	100	6.71739			0.482759	38.7898				19		183				71			86	1245	23.2	240	11.2	2.95	1283	60.9	110	13.1	52.8	10.5	2.73	7.68	0.95	4.76	0.83
Antisana	Main Arc	2G3T-A†	4	55.8326	1.06138	18.2537	0	7.56984	0	3.94513	7.14929	1.68219	4.18544	0.320417	100	5.86763			0.439011	18.0272				18		186				18			37.5	875	18.2	132	7.99	0.67	782	26.5	49.3	5.81	24.3	5.3	1.57	4.45	0.65	3.59	0.66
Antisana	Main Arc	HHV	4	57.6334	0.911002	16.0376	0	6.71739	0	5.86645	6.91761	2.10231	3.58394	0.230253	100	5.68625			0.458333	15.1899				20		165	252			92	55	80	73.9	594	18	145	8.25	3.67	614	24	45.2	5.28	21.6	4.79	1.24	4.17	0.62	3.49	0.68
Calpi	Main Arc	RIO94A	1	55.9614	0.824159	15.8218	7.89565	7.10405	0.122098	7.47848	7.73285	1.13958	3.61205	0.203496	100	4.75163			0.291921	10.3306	9.16			22.3		181.52	456.98	918.18	34.4	168.57	47.88	77.38	19.33	678.56	14.73	102.17	4.3	0.71	544.85	12.81	27.21	3.67	15.88	3.36	1.05	3.15	0.45	2.56	0.51
Cayambe	Main Arc	CAY168D	1	58.7342	0.708861	16.7089	7.59494	6.83544	0.111392	4.59747	6.73418	1.58987	3.79747	0.182278	100	5.38734			0.431596	15.8969	23.69			18.28		164.32	150.52	852.91	27.09	52.78	20.73	86.99	36.56	560.44	12.28	82.74	5.3	1.47	653.08	15.42	30.88	3.83	15.63	3.2	1	2.92	0.41	2.27	0.42
Cayambe	Main Arc	CAY-31	1	68.4988	0.52297	16.7145	3.53774	3.17884	0.0717801	0.943396	2.56358	3.07629	4.25554	0.174323	100	7.33183			0.619298	18.8649	23.86			5.74		43.15	3.48	472	4.61	3.18	5.99	56.73	98.17	403.23	17.1	150.18	10.59	3.3	1256.86	27.92	52.74	6.36	23.74	4.31	1.07	3.5	0.51	2.89	0.57
Cayambe	Main Arc	CAY-45C	1	59.6335	0.850461	15.1362	6.32783	5.68999	0.101245	4.81928	6.58095	2.97661	3.64483	0.566974	100	6.62144			0.461579	63.7895	20.15			15.34		147.16	173.09	715.25	21.13	39.18	64.67	82.41	79.31	1426.85	18.87	236.42	8.71	2.63	1686.87	72.72	148.77	17.57	69.46	11.9	3.22	8.29	0.91	3.99	0.63
Cayambe	Main Arc	CAY-56	1	57.7414	0.899336	17.4553	7.83853	7.05161	0.112417	4.33316	7.23556	1.33878	3.61778	0.214614	100	4.95657			0.297065	11.9	7.69			18.12		176.82	57.75	786.38	24.62	44.81	37.56	88.59	32.45	600.04	19.76	122.77	5.87	0.91	622.89	17.85	36.2	4.66	19.91	4.2	1.19	4.24	0.6	3.36	0.65
Cayambe	Main Arc	CAY 077A	5	65.2641	0.712995	17.0817	4.27797	3.8562	0.0602531	2.31974	4.10725	2.63105	3.76582	0.200844	100	6.39687			0.914634	40.2985		1.69		8.2		100	44			17			87	576	8.2	132	7.5		1180	27	47		21.5	3.55	1.02	2.5		1.65
Cayambe	Main Arc	CAY 077B	5	66.9311	0.582446	16.0173	4.07712	3.66539	0.0602531	2.06869	4.01687	2.70135	3.79594	0.160675	100	6.49729			0.860215	32.0513		1.7		8.2		95	33			16			78	520	9.3	55	8		1220	25	44		20	4.1	0.91	2.65		1.75
Cayambe	Main Arc	CAY 078A	5	66.044	0.682937	17.0734	4.20809	3.78628	0.0502159	1.51652	3.8365	2.73175	4.10766	0.170734	100	6.83941			0.601449	46.7391		1.88		8.4		116	44			17			73.5	565	13.8	111	8.3		1250	43	89		43.5	8	1.55	5.25		3
Cayambe	Main Arc	CAY 079A	5	65.1366	0.723182	16.9948	4.42949	3.98755	0.0703094	2.11933	4.27883	2.46083	4.01768	0.210928	100	6.47851			0.734513	38.764		1.55		8.3		110	47			17			72	592	11.3	130	8.3		1100	34.5	67		33	5.9	1.27	3.7		2.25
Cayambe	Main Arc	CAY 079B	5	65.9271	0.682662	16.9762	4.00562	3.60406	0.0501958	2.0781	4.11605	2.71057	3.65425	0.200783	100	6.36482			0.79	42.9577		1.55		7.8		102	38			15			64	576	10	118	7.9		1085	30.5	58.5		28.5	5.3	1.17	3.45		2
Cayambe	Main Arc	CAY 080A	5	66.7738	0.652873	17.718	4.28887	3.85697	0.0200884	0.93411	3.28445	2.6818	3.8871	0.19084	100	6.5689			0.986842	33.871		1.52		9		140	55			14			68	496	7.6	92	7.5		1080	21	39		19.5	4.1	1.13	2.8		1.7
Cayambe	Main Arc	CAY 080B	5	67.9643	0.642119	17.5078	3.38116	3.04003	0.0100331	0.90298	3.27079	2.67884	3.92295	0.0601987	100	6.60179			0.963855	37.0968		1.5		8		105	45			13			74.5	530	8.3	90	8		1060	23	41		18	3.5	1.08	2.45		1.6
Cayambe	Main Arc	CAY 080C	5	64.0479	0.754451	16.2459	5.88472	5.30128	0.0704155	2.41424	4.61724	2.30359	4.02374	0.221306	100	6.32733			0.493976	29.2929		1.68		9.1		125	47			28			63	605	16.6	125	8.2		1020	29	54		27	5.4	1.34	4		2.8
Cayambe	Main Arc	CAY 089	5	68.8786	0.481879	15.3599	3.845	3.45347	0.0702741	1.31513	3.52374	2.50979	4.24656	0.160626	100	6.75635			0.709091	27.6596		1.48		6.3		72	11			6			75	457	11	110	7.8		1170	26	49		20.5	3.6	0.9	2.7		1.96
Cayambe	Main Arc	CAY 090	5	67.557	0.5121	16.0759	3.98634	3.5847	0.0702882	1.31539	3.48429	2.69103	4.54865	0.160659	100	7.23968			0.757009	29.3478		1.59		5.9		71	15			6			78	496	10.7	89	8.1		1180	27	50		21.5	3.7	0.92	2.8		2
Cayambe	Main Arc	CAY 091	5	67.9418	0.491968	16.2249	3.95582	3.56426	0.060241	1.25502	3.40361	2.6004	4.31727	0.140562	100	6.91767			0.561538	28.0374		1.48		6		67	15			8			76	452	13	123	7.3		1150	30	51		22.5	4.1	0.95	2.75		2.2
Cayambe	Main Arc	CAY 103	5	63.969	0.603197	16.8795	5.25787	4.7351	0.0904795	2.35247	4.7351	2.24188	4.24249	0.150799	100	6.48437			0.464286	25.2174		1.41		9.7		109	52			20			65	530	14	128	6.5		980	29	48		24	4.5	1.08	3.3		2.7
Cayambe	Main Arc	CAY 105A	5	64.3037	0.683761	16.8627	5.42986	4.88688	0.0703871	2.15184	4.31373	2.34289	4.22323	0.160885	100	6.56611			0.757895	27.0588		1.32		8		108	24			13			70.5	562	9.5	120	7.2		1020	23	38		21.7	4.45	1.23	3.05		2.15
Cayambe	Main Arc	CAY 083A	5	64.7532	0.653463	16.0853	5.21765	4.69488	0.070373	2.31225	4.6044	2.66412	3.97105	0.191012	100	6.63517			0.75	29.878		1.37		8.2		104	33			16			66.5	590	9.6	110	7.2		935	24.5	44		21	4.1	1.04	2.6		1.85
Cayambe	Main Arc	CAY 083D	5	65.0754	0.653266	15.9799	5.09548	4.59296	0.0703518	2.33166	4.79397	2.19095	4.13065	0.180905	100	6.32161			0.852273	40.8333		1.32		8.4		104	31			17			56	605	8.8	111	7.5		960	24.5	46		20	3.7	1	2.8		1.65
Cayambe	Main Arc	CAY 084	5	65.4673	0.603015	15.9899	4.88442	4.39196	0.0703518	2.30151	4.61307	2.27136	4.1206	0.170854	100	6.39196			0.833333	32.6667		1.42		7.9		100	30			20			64.5	562	9	110	7.5		990	24.5	46		20.8	3.65	0.97	2.75		1.85
Cayambe	Main Arc	CAY 085	5	64.5917	0.673773	15.9493	5.65165	5.0885	0.0603379	2.3029	4.89743	2.27273	3.97224	0.19107	100	6.24497			0.73	32.6667		1.35		10.2		121	54			24			65	568	10	88	7.3		973	24.5	47		22	4	1.01	3		1.85
Cayambe	Main Arc	CAY 008	5	62.3969	0.684242	17.1362	6.14812	5.53431	0.0804991	2.54578	5.34313	1.88167	4.19602	0.201248	100	6.07768			0.623656	29.6774				8.2		128	29			16			51	565	9.3	105	5.8		736	18.4	36		18		0.95			1.98
Cayambe	Main Arc	CAY 179A	5	65.7154	0.562701	16.0269	4.78296	4.31069	0.0703376	2.22066	4.26045	2.42162	4.24035	0.17082	100	6.66198			0.783133	32.8571				8.4		94	44			19			72	555	8.3	117	6.5		980	23	45		17	3.6	0.93	2.8		1.7
Cayambe	Main Arc	CAY 039	5	66.9412	0.542278	16.2583	4.22776	3.80599	0.0602531	1.63687	3.69552	2.58084	4.30809	0.170717	100	6.88893			0.949367	41.9643				5.6		80	23			12.5			69	560	7.9	56	7.5		985	23.5	44		20.5		0.91			1.66
Cayambe	Main Arc	CAY 087	5	67.6979	0.522298	15.6589	4.21856	3.79671	0.0602652	1.64725	3.87706	2.39052	4.19847	0.150663	100	6.58899			1.15714	57.3171		1.45		5.3		80	20			12			66	540	7	65	8.1		980	23.5	43		18.5	3.1	0.94	2.75		1.22
Cayambe	Main Arc	CAY 092	5	62.5075	0.734554	16.6231	6.16824	5.55444	0.0804991	2.88791	5.31294	2.02254	4.0652	0.21131	100	6.08774			0.723404	27.1605		1.38		9.8		134	54			26			54	610	9.4	96	6.8		940	22	42.5		20	3.7	1.04	2.65		1.77
Cayambe	Main Arc	CAY 093A	5	63.0255	0.633675	16.214	5.89419	5.3108	0.100583	3.17843	5.44156	2.04184	3.88252	0.170992	100	5.92436			0.583333	23.8372		1.31		13.3		129	81			29			58	502	10.8	99	6.3		880	20.5	40		18	3.45	0.95	2.7		2
Cayambe	Main Arc	CAY 071	5	67.6107	0.492116	15.9385	4.30853	3.87667	0.0602591	1.54665	3.78628	2.42041	4.10766	0.160691	100	6.52807			0.747126	31.5068		1.41		7.4		85	23			10			71.5	490	8.7	73	6.5		1020	23	42		18.5	3.4	0.9	2.2		1.8
Cayambe	Main Arc	CAY 074A	5	65.9465	0.542605	16.7705	4.70257	4.24035	0.0803859	1.88907	4.14992	2.2709	3.959	0.150723	100	6.2299			0.755102	27.439		1.54		8.5		93	27			13			66.5	512	9.8	125	7.4		1100	22.5	48		18.5	3.75	0.93	2.35		1.8
Cayambe	Main Arc	CAY 095	5	61.6762	0.73448	16.5308	6.23805	5.61425	0.0905524	3.50136	5.73498	1.99215	3.91387	0.211289	100	5.90603			0.736842	25.6579		1.41		13.4		152	103			40			57	560	9.5	79	7		960	19.5	39		17	3.3	1	2.6		1.7
Cayambe	Main Arc	CAY 096A	5	61.6484	0.815135	16.5845	6.30975	5.67576	0.0805072	3.08946	5.7462	1.93217	4.18637	0.241522	100	6.11855			0.695238	27.3256		1.46		12		145	81			36			51	664	10.5	94	7.3		965	23.5	45		21	4.05	1.18	3.05		1.9
Cayambe	Main Arc	CAY 097A	5	64.3712	0.64341	16.1456	5.25787	4.7351	0.0804263	2.57364	4.92611	2.37257	3.96099	0.191012	100	6.33357			0.709677	38.0952		1.5		9.3		120	55			22			65	566	9.3	85	6.6		1060	24	46		19.5	3.75	1	2.6		1.67
Cayambe	Main Arc	CAY 098	5	61.6538	0.714214	16.2961	5.98531	5.38175	0.0905342	3.72196	5.98531	1.95151	3.97344	0.231365	100	5.92496			0.675676	29.7619	15.4	1.35	10.3	13		139	110			48			50	675	11.1	101	7.5		950	25	52.5		22.5	4.35	1.16	3		2
Cayambe	Main Arc	CAY 075	5	63.0319	0.754451	16.618	5.85454	5.2711	0.0804748	2.68585	4.9492	2.203	4.18469	0.221306	100	6.38769			0.77	29.0123		1.52		10		165	53			25			61.5	630	10	98	7.7		1075	23.5	46		21.5	3.9	1.1	3		2
Cayambe	Main Arc	CAY 044A	5	59.6838	0.775506	17.323	6.95941	6.26448	0.100715	3.69624	6.43569	1.47044	4.04875	0.20143	100	5.51919			0.495726	18.4783	14	1.09	6.8	12.4		153	96			37			35	600	11.7	114	5.8		625	17	35.5		18		1.01			2.33
Cayambe	Main Arc	CAY 044B	5	61.8434	0.694305	17.1966	6.2588	5.62487	0.0905615	2.98853	5.49406	1.70054	4.17589	0.191185	100	5.87643			0.586538	23.3766				9.4		130	45			25			40	595	10.4	114	6.1		740	18	34		17.5		1			2.12
Cayambe	Main Arc	CAY 046B	5	65.8093	0.552597	16.809	4.60163	4.13946	0.0803778	1.71807	4.24997	2.16015	4.30021	0.18085	100	6.46036			0.653465	26.2821				6.3		85	13			8			58	555	10.1	77	6.6		900	20.5	39		19		0.9			1.9
Cayambe	Main Arc	CAY 081	5	67.5706	0.592548	15.8281	4.24827	3.81641	0.0803455	1.51652	3.55529	2.69157	4.15788	0.190821	100	6.84945			0.568047	21.223		1.6		7		70	20			8			84	464	16.9	155	9.6		1100	29.5	56		25	4.2	1.11	3.4		2.7
Cayambe	Main Arc	CAY 082	5	67.1991	0.602773	16.084	4.51075	4.05867	0.0904159	1.53707	3.41571	2.72252	4.1089	0.180832	100	6.83142			0.488889	17.5439		1.5		7.6		70	22			9			85	462	18	135	8.8		1100	30	55		26.5	5.2	1.11	3.6		3
Cayambe	Main Arc	CAY 094A	5	65.4005	0.613004	16.119	4.90403	4.41162	0.0904432	2.47211	4.42167	2.47211	3.79861	0.200985	100	6.27073			0.52381	18.4028		1.56		9.5		95	68			28			71.5	558	16.8	151	8.8		1040	26.5	48.5		24	4.9	1.15	3.75		2.95
Cayambe	Main Arc	CAY 107	5	65.1221	0.683486	16.0519	5.1965	4.68389	0.0603076	2.13087	4.29189	2.98522	3.81948	0.170871	100	6.8047			0.479798	21.0526		1.55		10.8		110	58			23			102	446	19.8	146	9.5		1050	32	60		28	5.6	1.14	4.55		3.55
Cayambe	Main Arc	CAY 108A	5	65.5952	0.622803	16.5244	4.46007	4.00804	0.0904068	2.23004	4.32948	2.37067	3.99799	0.23104	100	6.36866			0.483146	16.1392		1.5		8.9		91	50			9			65	578	17.8	146	8.6		990	25.5	50		23	4.65	1.16	3.5		3.25
Cayambe	Main Arc	CAY 109A	5	65.1348	0.693886	16.5125	5.48069	4.92759	0.0703942	2.19228	3.6605	3.06718	3.56999	0.170957	100	6.63717			0.462963	18.0556		1.63		10		112	46			18			105	396	21.6	170	10		1000	32.5	68		33.5	6.8	1.32	5.05		4.15
Cayambe	Main Arc	CAY 153	5	60.0886	0.906162	16.8647	6.84656	6.1619	0.0906162	3.88643	6.1317	2.05397	3.57431	0.241643	100	5.62827			0.445714	16.1972	12	1.29	14.8	16		164	144			50			53	567	17.5	185	7.8		742	23	45		23.5	4.9	1.21	4.25		3.2
Cayambe	Main Arc	CAY 109B	5	60.9317	0.835094	18.1407	6.26824	5.64443	0.0704296	2.50528	5.29228	2.41473	3.95412	0.211289	100	6.36885			0.363636	20.2778		1.32		12.5		130	39			16			74	534	22	190	8		763	36.5	59		36	7.4	1.66	5.1		4.35
Cayambe	Main Arc	CAY 066	5	60.5963	0.886382	17.637	7.19178	6.47663	0.0805802	2.83038	5.40894	1.92385	3.9585	0.20145	100	5.88235			0.423529	16.5414		1.25		15.1		165	24			18			52	505	17	155	7.2		772	22	37		23	4.5	1.25	4.05		3.25
Cayambe	Main Arc	CAY 050	5	59.1395	0.916969	17.1302	7.62797	6.87223	0.0906892	3.86941	6.46917	1.64248	3.64772	0.221685	100	5.29021			0.372222	12.987		1.24		16.2		175	76			28			44.5	604	18	144	6.7		705	20	37		22	4.9	1.24	4.2		3.42
Cayambe	Main Arc	CAY 055B	5	59.6134	0.936179	17.4351	6.52305	5.86873	0.0905979	4.18764	6.85524	1.50997	3.29173	0.211395	100	4.80169			0.346591	13.6364		1.12		16		185	98			35			35.5	550	17.6	125	6.1		675	18	36.5		20	4.2	1.21	4.25		3.3
Cayambe	Main Arc	CAY 094B	5	58.9142	0.9166	17.1636	7.26229	6.53707	0.0906527	4.21031	6.44641	1.91378	3.59589	0.211523	100	5.50967			0.476744	16.9118		1.37		17.5		178	133			49			56	574	17.2	171	8.2		820	23	45		24	4.9	1.32	4		3.25
Cayambe	Main Arc	CAY 100A	5	58.215	0.856251	18.5655	7.40405	6.65861	0.100735	3.34441	6.90037	1.42037	3.73728	0.201471	100	5.15765			0.260465	10.25		1.15		17		188	19			10			40	568	21.5	118	5.6		660	20.5	31		19.5	4.6	1.23	3.95		3.9
Cayambe	Main Arc	CAY 108C	5	60.9746	0.85582	17.0761	6.87676	6.19211	0.0805477	3.41321	5.48731	2.10431	3.60451	0.211438	100	5.70882			0.47619	20.0704		1.35		15		160	105			33			64	552	16.8	175	8		900	28.5	50		25	5.3	1.25	3.9		3.2
Cayambe	Main Arc	CAY 102	5	58.7252	0.896184	17.6115	7.01843	6.32363	0.100695	3.76599	6.81704	1.79237	3.76599	0.20139	100	5.55835			0.429487	13.3333	8.5	1.05	7.2	15.8		182	83			32			40.5	645	15.6	123	6.7		745	18	35		18.4	4.1	1.14	3.45		3
Cayambe	Main Arc	CAY 100D	5	63.4242	0.93552	17.0204	5.89478	5.31134	0.0905342	1.51896	4.45629	2.33377	4.55689	0.352077	100	6.89065			0.37037	11.4		1.65		12		96	4			2			63.5	505	27	205	10		1115	28.5	56		30.5	6.7	1.7	5.85		5.15
Cayambe	Main Arc	CAY 106A	5	61.6112	0.86493	18.4854	5.65222	5.08901	0.060344	1.69969	5.37061	2.1221	4.44534	0.251433	100	6.56743			0.447368	16.25		1.5		11.1		118	20			11			60	627	19	182	8.5		925	26	47		25.7	5.6	1.43	4.45		3.75
Cayambe	Main Arc	CAY 106B	5	61.81	0.864756	18.542	5.50025	4.94721	0.0603318	1.7094	5.23881	2.16189	4.41428	0.251383	100	6.57617			0.415	16.4773		1.43		10.7		119	19			11			62	614	20	183	8.3		915	29	45		28	6.2	1.49	4.6		3.85
Cayambe	Main Arc	CAY 106D	5	61.5973	0.885134	18.5778	5.73325	5.15993	0.0704084	1.70992	5.29069	2.12231	4.32509	0.261517	100	6.44739			0.482353	15.6051		1.42		11		119	21			9			59	610	17	180	8.2		900	24.5	45		23.5	5.4	1.41	3.8		3.4
Cayambe	Main Arc	CAY 099B	5	61.2514	0.865104	18.7305	5.90484	5.31134	0.0704155	1.52902	5.92496	1.7805	4.28528	0.251484	100	6.06579			0.423313	15.6489		1.35		11		118	4			3			48	603	16.3	150	6.9		785	20.5	39		21	3.85	1.33	3.65		3.2
Chacana	Main Arc	PIF-1A	1	76.4183	0.158764	13.5478	1.03726	0.931414	0.0529213	0.201101	1.10076	3.96909	3.59865	0.0211685	100	7.56774			1.16213	30.5823	28.06	1.72		1.94		7.16	0.34	317.52	0.79	0.36	2.1	30.82	139.06	164.16	7.71	86.79	8.96	7.83	1096.18	24.16	47.03	4.71	15.36	2.39	0.5	1.72	0.23	1.31	0.25
Chacana	Main Arc	Ch-3	4	57.8552	0.781015	16.2211	0	6.90898	0	6.40833	7.23941	1.27165	3.18414	0.130169	100	4.45579			0.332331	8.58333				24		182	246			93	45	77	34.3	399	13.3	77	4.42	0.91	442	10.3	20	2.45	10.4	2.77	0.92	2.72	0.44	2.62	0.52
Chacana	Main Arc	Ch-4	4	77.2686	0.150075	12.7964	0	0.78039	0	0.16008	0.38019	4.1921	4.24212	0.030015	100	8.43422			0.742331	12.9114				3		5	0			4	3	45	125	33	16.3	106	12.1	5.87	1082	20.4	38.1	4.28	15	3.49	0.43	2.74	0.49	2.96	0.57
Chacana	Main Arc	Ch-5	4	74.6148	0.210126	14.2285	0	1.09065	0	0.280168	1.20072	3.95237	4.38263	0.040024	100	8.335			1.09804	30.6863				2		12	0			3	4	37	126	236	10.2	145	11.2	5.45	1096	31.3	51.5	5.08	16.9	2.9	0.61	2.05	0.31	1.73	0.35
Chacana	Main Arc	Ch-6	4	62.45	0.720576	17.1337	0	4.95396	0	2.69215	5.53443	2.14171	4.15332	0.220176	100	6.29504			0.497414	25.9091				12		132	28			15	17	71	61.3	609	11.6	127	5.77	1.57	822	22.8	40.9	4.73	18.6	3.94	1.11	3.12	0.44	2.35	0.43
Chacana	Main Arc	Ch-7	4	62.246	0.800721	16.4348	0	4.97448	0	3.14283	5.57502	2.34211	4.21379	0.270243	100	6.5559			0.708943	29.4565				13		126	49			27	38	77	61.5	777	12.3	114	8.72	2.54	819	27.1	48.7	5.51	21.8	4.52	1.22	3.52	0.46	2.52	0.45
Chacana	Main Arc	Ch-8	4	63.1542	0.760532	16.6316	0	4.64325	0	2.65186	5.22366	2.4317	4.24297	0.260182	100	6.67467			0.715652	37.093				11		126	23			19	41	70	59.9	749	11.5	127	8.23	2.22	1021	31.9	55.1	5.95	22.9	4.42	1.23	3.3	0.45	2.34	0.41
Chacana	Main Arc	E05030	8	57.3975	0.961179	16.4311	7.31507	6.58357	0.13153	5.37248	7.24425	2.03365	3.50071	0.344001	100	5.53436			0.6	19.4667				20.7		138	144			75			52.2	727	18.5	187	11.1	5.24	818	29.2	57.7	6.8	26.6	5.3	1.3	4.1	0.5	3.5	0.7
Chacana	Main Arc	E05036	8	63.3874	0.65044	15.7833	5.33564	4.80207	0.0813049	3.53677	5.23401	2.13425	3.99411	0.396362	100	6.12836			0.791304	21.2727				14.5		111	171			72			61.4	638	11.5	128	9.1	16.81	767	23.4	41.8	4.8	18.1	3.3	1	2.5	0.3	2.1	0.4
Chacana	Main Arc	E05135	8	75.8142	0.145716	13.3435	0.967974	0.871176	0.0520416	0.18735	1.00961	4.41313	3.53883	0.624499	100	7.95196			1.19753	33.7143				2.4		6	bdl			2			148.4	174	8.1	92	9.7	6.44	1037	23.6	40.6	4.1	13.3	2	0.3	1.5	0.2	1.1	0.2
Chacana	Main Arc	E05136	8	74.3824	0.189456	14.3986	1.16831	1.05148	0.0631519	0.231557	1.11568	4.22065	3.76806	0.578893	100	7.98872			1.15686	34.25				2.2		6	2			2			126.2	213	10.2	145	11.8	3.97	1036	27.4	49	4.6	15.2	2.4	0.5	1.7	0.2	1.5	0.3
Chacana	Main Arc	E05019	8	61.8688	0.68721	16.5329	5.91598	5.32438	0.0896361	3.41613	5.65703	1.88236	4.17306	0.368504	100	6.05542			0.57	22.5				13.8		113	80			27			52.4	644	10	143	5.7	1.13	796	18	35.1	4.1	16.6	3.2	0.9	2.6	0.3	1.9	0.3
Chacana	Main Arc	E05021	8	61.8238	0.741966	16.6842	6.16634	5.54971	0.0902391	3.6597	5.96581	1.06282	4.11089	0.310824	100	5.17371			0.617391	21.8889				14.2		124	72			34			56.5	610	11.5	139	7.1	1.84	696	19.7	38.2	4.4	17.6	3.3	0.9	2.5	0.4	2.1	0.4
Chacana	Main Arc	E05032	8	62.4837	0.763834	16.6838	5.54785	4.99307	0.0804036	2.64327	5.19608	2.41211	4.3418	0.402018	100	6.7539			0.833333	34.2222				11.3		110	40			18			61.9	783	10.8	173	9	2.02	1039	30.8	55.3	6.2	24.2	4.2	1.1	3.1	0.4	2.1	0.4
Chacana	Main Arc	E05035	8	62.2258	0.695992	17.0266	5.55785	5.00207	0.0806948	2.69319	5.43681	2.22919	4.22639	0.3833	100	6.45558			0.580357	24.1111				12.3		103	45			14			67.5	645	11.2	164	6.5	2.13	853	21.7	41	4.8	17.5	3.6	1	2.7	0.4	2.1	0.4
Chacana	Main Arc	E05137	8	62.4289	0.684704	16.1912	5.70922	5.1383	0.0906226	3.28255	5.52798	2.18501	4.07802	0.392698	100	6.26303			0.63964	19.6				12.9		122	62			45			64.1	579	11.1	135	7.1	1.95	778	19.6	37.2	4.4	16.7	3.3	0.8	2.5	0.3	2	0.4
Chacana	Main Arc	E05138	8	62.0624	0.784582	16.3857	5.77372	5.19635	0.0905287	2.94721	5.47196	2.37386	4.27497	0.412408	100	6.64883			0.773913	27.2222				11.9		123	53			26			64.8	779	11.5	148	8.9	2.29	885	24.5	47.5	5.6	21.3	4	1	3.2	0.4	2.1	0.4
Chacana	Main Arc	E05142	8	61.8728	0.705275	16.5639	6.02507	5.42256	0.0906783	3.28457	5.76311	1.80349	4.1309	0.362713	100	5.93439			0.539216	18.6667				14		128	95			33			50	625	10.2	138	5.5	3.45	760	16.8	33.1	4	15.1	2.9	0.9	2.6	0.3	2	0.4
Chacana	Main Arc	E05143	8	60.0058	0.795113	16.5162	6.67291	6.00562	0.100647	4.1064	6.31058	1.80158	4.00576	0.352265	100	5.80734			0.623853	19.9				15.2		144	145			52			44.1	719	10.9	146	6.8	1.74	777	19.9	38.7	4.6	19.1	3.5	1	2.7	0.4	1.9	0.4
Chacana	Main Arc	E05144	8	59.1554	0.823136	16.6836	7.03681	6.33313	0.100382	4.39675	6.63528	1.47562	4.06549	0.331262	100	5.54111			0.6	19.2				16		153	151			63			33.3	700	12	141	7.2	0.62	688	19.2	37.4	4.5	19.2	3.3	1.1	2.9	0.4	2.2	0.4
Chacana	Main Arc	E05147	8	59.2419	0.855441	16.8099	7.04966	6.34469	0.103065	4.00923	6.44157	2.03038	3.8031	0.360728	100	5.83349			0.543478	17.2				14.5		151	144			60			54.7	623	13.8	166	7.5	1.22	747	17.2	33.9	4	15.9	3.2	0.8	2.6	0.4	2.2	0.4
Chalupas	Main Arc	COT-1A	1	74.2857	0.25974	14.2857	1.4961	1.35065	0.0519481	0.332468	1.20519	4.23896	3.94805	0.0415584	100	8.18701			0.920676	23.6368	25.2705	2.0868		2.2404		8.77405	0.988013	342.639	0.941232	0.560744	2.79164	32.1867	171.032	185.505	11.4873	150.765	10.5761	9.64335	1055.35	28.5747	58.1409	6.05315	20.0652	3.21391	0.627425	2.3873	0.347061	1.99215	0.389898
Chalupas	Main Arc	Cl-11	4	74.4898	0.240096	14.1357	0	1.2405	0	0.380152	1.2605	4.63185	3.58143	0.040016	100	8.21329			0.90625	25.1562				2		10	0			2	5	39	182	221	12.8	169	11.6	9.77	1047	32.2	53.7	5.6	19.6	3.52	0.64	2.64	0.39	2.27	0.43
Chalupas	Main Arc	CTX-14	14	74.1867	0.241913	14.229	0	1.24529	0.0408292	0.244975	1.24529	4.53205	3.99106	0.0428707	100	8.5231			0.885886	27.0244				2.3		8	1			4			174.6	223	13.32	178	11.8		1056	33.24	56.31	5.73	19.37	3.34	0.66	2.57	0.39	2.24	0.43
Chalupas	Main Arc	CTX-36	14	74.3408	0.243408	14.0467	0	1.26775	0.0507099	0.314402	1.16633	4.53347	3.99594	0.040568	100	8.52941			0.872741	25.3876				2.6		15				5			175.4	204	13.28	172	11.59		1037	32.75	55.94	5.71	19.65	3.62	0.66	2.64	0.41	2.37	0.45
Chalupas	Main Arc	CTX-48	14	73.7594	0.251636	14.4439	0	1.32864	0.0503271	0.312028	1.23805	4.62003	3.94565	0.0503271	100	8.56568			0.890511	25.7323				2.6		10	1			5			175.9	213	13.7	193	12.2		1075	32.68	55.35	5.77	19.86	3.65	0.67	2.68	0.41	2.31	0.46
Chalupas	Main Arc	CTX-86	14	74.3941	0.233242	14.0858	0	1.20677	0.0405638	0.283947	1.21692	4.604	3.87385	0.0608458	100	8.47784			0.855244	24.0916				2.5		9	2			3			172.8	202	13.54	180	11.58		1014	31.56	54.07	5.54	19.36	3.44	0.64	2.55	0.4	2.35	0.45
Chalupas	Main Arc	CTX-130	14	73.3992	0.267655	15.2357	0	1.38975	0.0514721	0.35001	1.26621	4.45748	3.52069	0.0617665	100	7.97818			1.24902	18.1429				2.4		6	3			4			167.2	187	10.24	193	12.79		1056	20.32	38.66	4.26	15.15	2.92	0.54	2.18	0.33	1.96	0.39
Cotopaxi	Main Arc	CTX-77	14	62.4831	0.66061	17.8894	0	4.95708	0.0899469	2.22869	5.45678	1.65902	4.33744	0.23786	100	5.99646			0.473851	15.8077				11.3		110	10			9			38.3	576	12.62	127	5.98		644	16.44	31.73	3.87	16.29	3.71	1.1	3.3	0.46	2.5	0.46
Cotopaxi	Main Arc	CTX-78	14	60.6897	0.693711	18.3594	0	5.50184	0.089704	2.46188	6.19954	1.46516	4.30579	0.23323	100	5.77096			0.328603	13.3274				13		133	19			6			32.9	609	13.39	112	4.4		578	15.06	28.86	3.54	15.12	3.47	1.07	3.14	0.46	2.59	0.5
Cotopaxi	Main Arc	CTX-82	14	60.969	0.60241	17.9925	0	5.4157	0.0997367	2.76271	6.31333	1.58581	4.05928	0.199473	100	5.6451										138	21			9						105
Cotopaxi	Main Arc	CTX-67	14	74.5755	0.16732	14.6072	0	1.45764	0.0595373	0.420867	1.52949	3.03845	4.08549	0.0585107	100	7.12394			0.955582	29.5833				3.2		18	34			11			71.4	248	8.33	85	7.96		954	21.3	36.91	3.85	13.59	2.53	0.55	1.94	0.27	1.5	0.28
Cotopaxi	Main Arc	CTX-17	14	75.7528	0.10443	14.1288	0	0.93168	0.0624533	0.153574	1.29002	3.10219	4.42292	0.0511912	100	7.52511			0.860849	32.3571				2.2		15	0			4			74.2	229	8.48	84	7.3		969	22.65	38.56	3.99	13.97	2.42	0.56	1.88	0.27	1.46	0.27
Cotopaxi	Main Arc	CTX-18	14	58.778	0.735479	17.8745	0	5.8979	0.111528	3.97882	7.27441	1.21575	3.95872	0.174827	100	5.17448			0.27471	9.71318				19.4		161	79			17			27.9	524	14.67	121	4.03		523	12.53	24.32	2.96	12.72	3.12	1.02	3.08	0.47	2.69	0.54
Cotopaxi	Main Arc	CTX-61	14	56.6816	0.787189	18.0314	0	6.85294	0.121874	4.4654	7.85191	1.13883	3.886	0.182812	100	5.02482			0.245449	7.95035				22		178	54			13			25	549	15.93	113	3.91		463	11.21	21.92	2.78	12.37	3.17	1.03	3.07	0.49	2.89	0.58
Cotopaxi	Main Arc	CTX-62	14	59.7118	0.73049	17.4556	0	5.99222	0.108221	3.59734	6.65357	1.44294	4.1184	0.189386	100	5.56135			0.322973	10.8769				18.8		142	82			17			33.7	567	14.8	128	4.78		589	14.14	27.41	3.33	14.21	3.42	1.05	3.16	0.48	2.83	0.55
Cotopaxi	Main Arc	CTX-66	14	75.7448	0.116655	14.0696	0	1.00425	0.06695	0.223167	1.32886	3.05333	4.32132	0.0710076	100	7.37465			0.836782	29.9474				2.2		2	1			5			74.9	215	8.7	91	7.28		983	22.76	39.38	4.16	14.72	2.67	0.56	1.98	0.29	1.56	0.29
Cotopaxi	Main Arc	CTX-60	14	75.3572	0.12812	14.2051	0	1.10834	0.0691443	0.244039	1.39306	3.01998	4.41304	0.0620265	100	7.43302			0.807916	26.8026				2.5		3	0			5			71.8	233	8.59	98	6.94		920	20.37	35.37	3.78	13.49	2.52	0.54	1.88	0.27	1.53	0.29
Cotopaxi	Main Arc	CTX-65B	14	57.2429	0.828331	18.2573	0	7.15286	0.114046	3.72149	7.11285	1.28051	4.09164	0.198079	100	5.37215			0.3125	13				24		168	38			19			29	599	16	110	5		526	13	26	3	14	4	1	3	1	3	1
Cotopaxi	Main Arc	CTX-65a	14	60.7619	0.671679	18.9975	0	5.05263	0.0902256	1.77444	6.10526	1.78446	4.53133	0.230576	100	6.31579			0.375	17				8		109	9			4			44	635	16	133	6		695	17	33	4	16	4	1	3	1	3	1
Cotopaxi	Main Arc	CTX-42	14	74.3657	0.161095	14.9819	0	1.05719	0.0604108	0.312122	1.55054	2.81917	4.62143	0.0704793	100	7.4406			0.812846	27.8861				2.3		4				5			69.2	268	9.03	114	7.34		1015	22.03	37.64	4.08	14.53	2.68	0.6	1.99	0.29	1.56	0.3
Cotopaxi	Main Arc	CTX-43	14	71.7936	0.267712	15.7675	0	1.98493	0.0773616	0.763436	2.33103	2.62622	4.28542	0.102809	100	6.91164			0.678963	22.8261				4		26	34			8			65.6	346	10.03	129	6.81		938	21	37.68	4.01	14.68	2.75	0.69	2.18	0.31	1.75	0.34
Cotopaxi	Main Arc	CTX-15	14	73.5099	0.194254	15.1314	0	1.24732	0.0736121	0.347613	1.83008	2.84225	4.74389	0.0797464	100	7.58614			0.723205	25.6163				2.2		14	1			1			69	321	9.61	128	6.95		961	22.03	38.29	4.04	14.56	2.5	0.67	2.02	0.3	1.65	0.31
Cotopaxi	Main Arc	CTX-19	14	72.7671	0.209671	15.3252	0	1.60039	0.0769807	0.42542	2.03594	2.77536	4.68975	0.0942001	100	7.46511			0.674	23.908				2.6		10	15			10			67.9	338	10	127	6.74		896	20.8	36.98	3.9	14.14	2.62	0.64	1.97	0.3	1.66	0.32
Cotopaxi	Main Arc	CTX-112	14	59.0382	0.84398	17.3344	0	6.66087	0.0970324	3.64882	6.63055	1.35441	4.1542	0.237527	100	5.50861			0.445696	17.4894				14.6		151	89			19			27.4	656	12.43	117	5.54		610	16.44	31.6	3.91	16.89	3.97	1.21	3.47	0.47	2.53	0.47
Cotopaxi	Main Arc	CTX-109	14	60.9504	0.694565	18.5421	0	5.37497	0.0897529	2.4784	6.04812	1.41769	4.18167	0.222342	100	5.59936			0.373634	13.0965				13.5		103	38			11			30	567	13.73	125	5.13		579	14.93	28.49	3.54	15.08	3.59	0.99	3.23	0.48	2.69	0.5
Cotopaxi	Main Arc	CTX-111	14	57.1558	0.846604	18.585	0	7.37754	0.110865	3.46704	7.09534	1.22959	3.94074	0.191494	100	5.17033			0.275686	9.42222				18.4		170	18			12			27.2	569	15.67	106	4.32		486	12.72	25.11	3.17	13.81	3.5	1.07	3.32	0.51	3	0.6
Cotopaxi	Main Arc	CTX-110	14	57.1495	0.849533	18.5829	0	7.37673	0.114883	3.46666	7.09456	1.22945	3.9403	0.195503	100	5.16976			0.302703	11.7581				17.6		170	18			12			28.6	612	14.8	106	4.48		539	14.58	27.88	3.43	14.82	3.59	1.09	3.19	0.49	2.87	0.55
Cotopaxi	Main Arc	CTX-40a	14	61.4539	0.776366	18.542	0	5.19258	0.0907441	2.29885	5.46481	1.77455	4.14398	0.26215	100	5.91853			0.444208	16.8033				13.8		129	7			3			47.3	619	14.07	134	6.25		757	20.5	38.17	4.56	18.32	4.15	1.11	3.46	0.5	2.82	0.53
Cotopaxi	Main Arc	CTX-40b	14	60.9485	0.73663	19.2735	0	5.02523	0.0908174	2.43189	5.44904	1.63471	4.15742	0.25227	100	5.79213			0.410949	16.7951				13.6		131	6			3			45.2	643	14.43	134	5.93		734	20.49	37.45	4.56	18.29	4.2	1.04	3.3	0.5	2.54	0.57
Cotopaxi	Main Arc	CTX-37	14	60.5412	0.746194	16.7745	0	5.60143	0.0895433	3.80062	6.14864	1.85056	4.21849	0.228833	100	6.06905			0.459337	19.068				17.2		144	95			36			50.1	653	13.28	125	6.1		759	19.64	36.09	4.31	17.3	3.79	1.13	3.19	0.47	2.57	0.47
Cotopaxi	Main Arc	CTX-41	14																0.636364	21				3									66	386	11		7		913	21	37	4	15	3	1	2	0.34	2	0.38
Cotopaxi	Main Arc	CTX-135	14	58.6442	0.801575	17.99	0	6.51153	0.112059	3.56368	6.75382	1.56479	3.85644	0.201908	100	5.42123			0.493143	18.3072				5.6		165	33			16			95.4	401	18.96	114	9.35		932	30.39	53.21	6.11	23.1	4.76	1.09	3.96	0.59	3.4	0.67
Cotopaxi	Main Arc	CTX-30	14	60.0491	0.694799	17.5802	0	6.02693	0.103119	3.40391	6.39736	1.53176	4.03464	0.178205	100	5.5664			0.298772	11.8512				17.6		155	58			22			36.6	518	14.66	114	4.38		594	14.34	27.63	3.28	13.78	3.24	0.95	3.03	0.46	2.66	0.53
Cotopaxi	Main Arc	CTX-29	14	57.97	0.818825	17.5505	0	6.56264	0.109377	4.20451	7.11455	1.42492	4.01385	0.230796	100	5.43876			0.326982	12.4211				20		162	69			35			32.9	619	16.27	118	5.32		594	16.52	31.57	3.81	16.12	3.79	1.13	3.47	0.52	3.02	0.59
Cotopaxi	Main Arc	CTX-16	14	60.6245	0.760841	17.2302	0	5.84795	0.0981404	3.27809	6.23242	1.57834	4.13808	0.211457	100	5.71642			0.405347	16.4352				14.5		140	47			10			36.9	569	13.84	123	5.61		667	17.75	33.3	3.95	16.21	3.74	1.14	3.31	0.49	2.67	0.5
Cotopaxi	Main Arc	CTX-51	14	60.5822	0.769851	18.3649	0	5.44772	0.0846538	2.27071	6.27434	1.48393	4.48167	0.240018	100	5.9656			0.423242	16.0762				11.8		125	27			8			29.5	663	13.94	124	5.9		647	16.88	32.4	4.01	17.14	3.97	1.19	3.49	0.49	2.68	0.49
Cotopaxi	Main Arc	CTX-49a	14	61.1136	0.704465	17.2169	0	5.71566	0.0959271	3.06767	5.87553	1.67872	4.32671	0.204844	100	6.00544			0.402062	16				13.1		123	55			18			41.2	569	13.58	125	5.46		693	17.6	32.95	3.93	16.46	3.78	1.11	3.28	0.49	2.73	0.51
Cotopaxi	Main Arc	CTX-50	14	61.4546	0.667638	18.0632	0	5.26925	0.0888188	2.41507	5.95785	1.40713	4.47088	0.205581	100	5.87801			0.348315	13.0261				13.4		110	26			10			30	561	14.24	120	4.96		611	14.98	31.6	3.62	15.23	3.7	1.03	3.26	0.49	2.69	0.51
Cotopaxi	Main Arc	CTX-107	14	59.7206	0.758483	18.1836	0	5.90818	0.0998004	2.76447	6.50699	1.55689	4.28144	0.219561	100	5.83832			0.361092	13.4083				14.8		123	243			64			35	593	14.29	121	5.16		607	16.09	30.74	3.75	15.86	3.79	1.12	3.4	0.51	2.81	0.54
Cotopaxi	Main Arc	CTX-53a	14	57.8256	0.763053	16.9456	0	7.3598	0.118318	4.11106	7.94136	0.972616	3.78017	0.182491	100	4.75278			0.251656	7.16923				23.1		165	77			28			20.9	502	15.1	98	3.8		357	9.32	18.8	2.45	11.3	2.9	0.94	2.94	0.48	2.66	0.57
Cotopaxi	Main Arc	CTX-53b	14	57.2128	0.74826	17.4527	0	7.24187	0.114345	4.53369	7.59293	0.992999	3.93187	0.178539	100	4.92487			0.246377	7.70161				22.7		177	73			29			20.7	497	14.49	95	3.57		387	9.55	19.45	2.47	10.97	2.95	0.94	2.94	0.46	2.72	0.53
Cotopaxi	Main Arc	CTX-103	14	61.7882	0.671852	17.8051	0	5.30622	0.0887732	2.3303	5.99219	1.45265	4.35796	0.206801	100	5.81061			0.373984	13.1712				12.7		104	26			8			30.7	554	13.53	121	5.06		604	14.62	28.18	3.47	14.76	3.59	1.06	3.17	0.49	2.68	0.51
Cotopaxi	Main Arc	CTX-104	14	58.9302	0.770626	16.8631	0	6.93059	0.110809	4.36184	6.76942	1.19875	3.86824	0.196434	100	5.06699			0.33411	12.5437				17.6		163	129			31			24.5	532	12.87	108	4.3		507	12.92	25.35	3.16	13.82	3.44	1	3.11	0.46	2.6	0.49
Cotopaxi	Main Arc	CTX-106	14	57.5599	0.754983	17.4955	0	7.04651	0.110731	4.6205	7.60016	0.996577	3.64405	0.171129	100	4.64063			0.235734	8.04				22		169	80			30			21.3	496	14.72	94	3.47		405	10.05	20.63	2.61	11.82	3.13	0.94	3.07	0.47	2.79	0.54
Cotopaxi	Main Arc	CTX-102	14	60.1157	0.709026	17.8772	0	6.36306	0.106051	2.77753	6.20146	1.45441	4.19154	0.204022	100	5.64595			0.336094	11.1496				14.3		136	32			10			32.7	551	14.49	118	4.87		592	14.16	27.43	3.4	14.56	3.57	1.03	3.29	0.49	2.79	0.53
Cotopaxi	Main Arc	CTX-101	14	59.1374	0.766168	17.68	0	6.69896	0.109309	3.36954	6.63879	1.36386	4.02138	0.214607	100	5.38524			0.365718	11.975				15.7		155	29			17			31	522	14.41	114	5.27		569	14.37	27.91	3.48	14.85	3.67	1.06	3.29	0.5	2.88	0.53
Cotopaxi	Main Arc	CTX-99	14	61.5654	0.706885	18.3367	0	4.85354	0.0825706	2.02399	5.97126	1.75211	4.48096	0.226566	100	6.23307			0.388889	14.0703				11.2		105	36			12			40.6	620	15.12	132	5.88		688	18.01	34.19	4.15	17.36	3.97	1.17	3.48	0.52	2.91	0.56
Cotopaxi	Main Arc	CYX-108	14	59.8109	0.764357	18.0931	0	5.87348	0.0905159	2.81605	6.49703	1.52871	4.31459	0.211204	100	5.84331			0.357143	13.4545				14.7		126	46			20			35.2	603	14.56	122	5.2		623	16.28	31.14	3.86	16.28	3.83	1.17	3.42	0.51	2.86	0.56
Cotopaxi	Main Arc	CYX-96	14	57.4651	0.828343	18.1537	0	7.26547	0.11976	3.47305	6.98603	1.45709	4.04192	0.209581	100	5.499			0.316556	12.2677				18.7									35.7	610	15.1		4.78		608	15.58	29.81	3.63	15.38	3.73	1.1	3.31	0.51	2.99	0.57
Cotopaxi	Main Arc	CTX-95	14	57.688	0.694794	19.5046	0	5.42745	0.0906253	3.22223	7.89447	1.26875	4.01772	0.19132	100	5.28648			0.387288	15.2128				16.2									26.9	764	11.8		4.57		544	14.3	27.1	3.29	13.82	3.23	1.05	2.88	0.42	2.34	0.44
Cotopaxi	Main Arc	CTX-98	14	59.0119	0.702882	17.9235	0	6.75771	0.120494	3.0726	6.55688	1.40576	4.21729	0.230947	100	5.62305			0.315217	11.1119				14.9									31.3	605	15.64		4.93		578	14.89	28.99	3.59	15.49	3.71	1.1	3.34	0.53	2.95	0.59
Cotopaxi	Main Arc	CTX-97	14	57.3629	0.875692	18.0674	0	6.82436	0.120785	4.0161	7.25717	1.27831	3.93558	0.261701	100	5.21389			0.365294	12.975				18.5									25.6	693	14.81		5.41		540	15.57	30.53	3.8	16.55	3.87	1.18	3.53	0.52	2.99	0.55
Cotopaxi	Main Arc	CTX-90	14	70.8507	0.287246	15.9535	0	2.12852	0.0836941	0.71295	2.63481	2.56249	4.64967	0.13639	100	7.21216										17	4			4						143
Cotopaxi	Main Arc	CTX-91	14	61.7684	0.683966	17.9705	0	5.26825	0.0916655	2.39741	6.03381	1.41024	4.1602	0.215565	100	5.57044			0.380282	12.5702				12.5		114	27			7			30	505	13.49	121	5.13		585	14.33	29.32	3.46	14.68	3.59	1.01	3.25	0.48	2.77	0.5
Cotopaxi	Main Arc	CTX-92	14	60.4799	0.702458	17.8386	0	6.20824	0.103807	2.80177	6.14777	1.47143	4.0414	0.20459	100	5.51283			0.337024	11.3065				15		134	19			8			33.8	547	14.45	119	4.87		582	14.02	27.06	3.34	14.36	3.47	1.02	3.22	0.49	2.8	0.54
Cotopaxi	Main Arc	CTX-93	14	61.5656	0.716231	18.7532	0	4.43862	0.0807021	2.11843	6.06275	1.70483	4.33774	0.221931	100	6.04257			0.392344	14.4333				11		104	20			10			38.84	634.64	14.63	134	5.74		659.6	17.32	33.3	4	16.75	3.88	1.13	3.4	0.51	2.89	0.54
Cotopaxi	Main Arc	CTX-94	14	74.2099	0.162075	15.0729	0	1.06361	0.060778	0.314019	1.55997	2.8363	4.64951	0.0709076	100	7.48582			0.812846	27.8861				2.3		4	0			5			69.2	268	9.03	114	7.34		1015	22.03	37.64	4.08	14.53	2.68	0.6	1.99	0.29	1.56	0.3
Cotopaxi	Main Arc	CTX-25	14	59.183	0.79504	18.1709	0	6.19031	0.108005	3.14016	6.42032	1.60008	4.18021	0.212011	100	5.78029			0.360026	14.0635				16.8		160	16			7			37.5	615	15.61	122	5.62		658	17.72	33.52	3.98	16.78	3.89	1.16	3.43	0.51	2.96	0.56
Cotopaxi	Main Arc	CTX-23	14	59.5453	0.73379	18.6655	0	5.56358	0.100245	2.7467	6.67629	1.63399	4.1401	0.194475	100	5.77409			0.324361	13.1186				16.6		140	21			8			41	620	14.86	115	4.82		659	15.48	29.66	3.55	14.78	3.38	1.04	3.1	0.47	2.65	0.52
Cotopaxi	Main Arc	CTX-21	14	57.5617	0.824746	18.3611	0	7.15382	0.111371	3.32106	6.92305	1.47491	4.06353	0.204682	100	5.53844			0.31195	12.2339				19.9		175	19			12			36.1	610	15.9	113	4.96		599	15.17	29.17	3.52	15.14	3.57	1.08	3.31	0.5	2.83	0.54
Cotopaxi	Main Arc	CTX-47	14	59.6353	0.767238	17.8956	0	6.04823	0.0996413	2.8896	6.43683	1.54444	4.46393	0.219211	100	6.00837			0.338983	13.112				14.9									35.6	590	15.34		5.2		620	16.39	31.48	3.89	16.77	3.97	1.18	3.55	0.53	3.03	0.57
Cotopaxi	Main Arc	CTX-46	14	61.1449	0.658223	17.762	0	5.555	0.0997307	2.84233	6.00379	1.48599	4.2585	0.189488	100	5.74449			0.361905	12.5526				13.3									34.2	594	13.65		4.94		589	14.31	27.77	3.45	14.95	3.61	1.09	3.25	0.49	2.73	0.52
Cotopaxi	Main Arc	CTX-22	14	60.1611	0.728128	19.2491	0	5.04863	0.0895075	1.92089	6.40632	1.77004	4.39492	0.231312	100	6.16496			0.362445	14.2344				13.5		112	10			2			43.9	652	16.03	132	5.81		706	18.22	34.99	4.17	17.31	3.98	1.13	3.46	0.52	2.96	0.56
Cotopaxi	Main Arc	CTX-24	14	57.3366	0.826546	18.196	0	6.81098	0.114352	3.87193	7.28243	1.39429	3.9622	0.20463	100	5.3565			0.308339	12.5372				21.2		173	38			15			32.4	639	15.47	109	4.77		582	15.17	29.32	3.62	15.34	3.62	1.1	3.25	0.51	2.86	0.56
Cotopaxi	Main Arc	CTX-26	14	60.6091	0.687237	19.1244	0	5.11921	0.0921659	1.8333	6.14105	1.76317	4.39792	0.232418	100	6.16109			0.348882	13.4961				11.6		101	7			2			41.5	602	15.65	134	5.46		670	17.41	33.33	3.96	16.41	3.73	1.07	3.31	0.5	2.86	0.55
Cotopaxi	Main Arc	CTX-34M	14	63.3499	0.52901	17.5966	0	5.08819	0.111052	1.8273	5.35067	1.70616	4.19977	0.241285	100	5.90593			0.335974	11.8222				8.9		83	15			4			41.2	478	15.15	135	5.09		681	15.96	30.24	3.66	15.11	3.54	1.03	3.15	0.48	2.86	0.55
Cotopaxi	Main Arc	CTX-34Z	14	57.6202	0.833885	18.2512	0	7.10606	0.112254	3.43777	6.92565	1.48335	4.01908	0.210476	100	5.50244			0.325887	12.0758				17.8		172	34			9			35.6	556	15.22	114	4.96		615	15.94	30.54	3.76	15.76	3.76	1.12	3.36	0.52	2.99	0.57
Cotopaxi	Main Arc	CTX-120	14	59.049	0.699584	17.9154	0	6.68154	0.121667	3.21403	6.71195	1.37889	4.00487	0.223056	100	5.38376			0.31589	10.9023				15.4									31.3	618	15.67		4.95		564	14.5	28.03	3.52	14.99	3.69	1.1	3.4	0.51	2.97	0.57
Cotopaxi	Main Arc	CTX-119	14	59.8478	0.775209	18.0748	0	5.83415	0.0953949	2.88193	6.4969	1.53636	4.23754	0.21991	100	5.7739			0.353021	13.2437				15.4		139	47			17			34.8	564	14.73	121	5.2		594	15.76	30.09	3.68	15.7	3.74	1.07	3.42	0.51	2.91	0.54
Cotopaxi	Main Arc	CTX-116	14	59.9737	0.76671	17.9099	0	5.88312	0.0962146	2.90648	6.48446	1.53342	4.22943	0.216483	100	5.76285			0.349764	12.9187				15.2		154	44			19			35.4	586	14.81	121	5.18		604	15.89	30.4	3.73	15.92	3.79	1.13	3.39	0.5	2.91	0.56
Cotopaxi	Main Arc	CTX-117	14	57.2519	0.83219	18.4364	0	7.07011	0.116166	3.55508	7.17025	1.32189	4.03577	0.210301	100	5.35766			0.304403	11.5414				17.7		171	34			12			30.2	656	15.67	112	4.77		571	15.35	29.38	3.64	15.54	3.83	1.17	3.47	0.53	3.05	0.59
Cotopaxi	Main Arc	CTX-118	14	52.9507	1.66671	17.6684	0	7.33681	1.01587	4.14175	7.42784	2.11184	4.57868	1.10143	100	6.69052			0.346131	7.01717				18.7		172	35			13			31.2	657	16.67	113	5.77		572	16.35	30.38	4.64	16.54	4.83	2.17	4.47	1.53	4.05	1.59
Cotopaxi	Main Arc	CTX-126b	14	59.5	0.730613	18.3916	0	6.15413	0.0990319	2.72843	6.55834	1.65727	3.98149	0.199074	100	5.63876			0.331232	13.4454				15.5		149	15			7			42.6	604	14.28	118	4.73		667	16	29.75	3.54	14.97	3.5	1.03	3.16	0.48	2.69	0.52
Cotopaxi	Main Arc	CTX-123	14	60.5598	0.696009	19.2337	0	4.98015	0.0909155	1.86882	6.28327	1.78801	4.26293	0.23638	100	6.05093			0.362412	14.0448				12.2		91	9			3			44.2	636	15.59	132	5.65		723	18.82	35.3	4.18	17.58	4.01	1.17	3.43	0.53	3.03	0.59
Cotopaxi	Main Arc	CTX-124	14	57.4763	0.832437	18.1568	0	7.22853	0.115616	3.52881	7.09783	1.43766	3.9209	0.205093	100	5.35856			0.312378	12.0231				18.6		179	20			13			35.6	617	15.43	111	4.82		588	15.63	29.42	3.54	15.33	3.68	1.13	3.33	0.51	2.9	0.57
Cotopaxi	Main Arc	CTX-75	14	57.4763	0.832437	18.1568	0	7.22853	0.115616	3.52881	7.09783	1.43766	3.9209	0.205093	100	5.35856			0.290691	9.78667				14.6		179	20			13			35.2	520	16.65	111	4.84		602	14.68	28.57	3.57	15.42	3.72	1.12	3.51	0.54	3.07	0.62
Cotopaxi	Main Arc	CTX-20b	14	59.1817	0.699696	18.0671	0	6.27105	0.120985	3.23634	6.634	1.39133	4.17398	0.223822	100	5.5653			0.308762	11.2957				15.5		137	41			13			28	550	14.38	112	4.44		508	12.99	24.72	3.09	13.36	3.23	1.03	2.97	0.45	2.56	0.5
Cotopaxi	Main Arc	CTX-20a	14	56.9597	0.872664	18.2182	0	7.05579	0.120784	3.92548	7.2269	1.28836	4.07646	0.255659	100	5.36482			0.372825	13.4917				19.5		170	43			20			26.3	659	14.94	112	5.57		560	16.19	31.46	3.79	16.52	4	1.2	3.41	0.51	2.94	0.55
Cotopaxi	Main Arc	CTX-122	14	57.0427	0.8923	18.0474	0	7.17062	0.116825	3.88745	7.16055	1.36967	4.04858	0.263863	100	5.41825			0.387841	15.1667				17.3		157	36			21			27.2	695	14.31	119	5.55		583	17.29	33.51	4.1	17.6	4.11	1.22	3.55	0.51	2.92	0.55
Cotopaxi	Main Arc	CTX-125	14	58.9527	0.701913	17.9355	0	6.70695	0.119839	3.28298	6.6566	1.37966	4.03827	0.225579	100	5.41793			0.313311	11.0078				15.3		127	43			15			29	578	14.65	116	4.59		545	14.09	27.29	3.36	14.5	3.54	1.08	3.14	0.49	2.83	0.55
Cotopaxi	Main Arc	CTX-132	14	57.6732	0.822044	18.113	0	6.83869	0.116148	3.60458	7.11904	1.29164	4.21535	0.206262	100	5.50699			0.306109	11.68				17.3		169	29			15			28.8	633	15.06	107	4.61		536	14.6	28.07	3.48	14.82	3.6	1.11	3.29	0.51	2.86	0.56
Cotopaxi	Main Arc	CTX-128	14	56.9547	0.914225	18.0622	0	7.14206	0.113142	3.71751	7.24308	1.43447	4.14179	0.276793	100	5.57626			0.429173	16.964				15.6		168	54			18			28.3	677	14.26	124	6.12		621	18.83	36.08	4.4	18.85	4.29	1.27	3.64	0.52	2.89	0.53
Cotopaxi	Main Arc	CTX-28a	14	57.765	0.803434	17.6435	0	7.23191	0.116353	3.75137	7.04134	1.39422	4.03222	0.220669	100	5.42644			0.333333	12.7698				18.7		164	37			22			31.5	614	15.42	114	5.14		577	16.09	31.01	3.73	15.84	3.72	1.14	3.43	0.51	3	0.57
Cotopaxi	Main Arc	CTX-28b	14	57.8557	0.805459	16.9469	0	7.05533	0.117084	4.27963	7.20673	1.57458	3.92636	0.23215	100	5.50094			0.333333	12.7698				18.7		164	37			22			31.5	614	15.42	114	5.14		577	16.09	31.01	3.73	15.84	3.72	1.14	3.43	0.51	3	0.57
Cotopaxi	Main Arc	Cx-9	4	74.0392	0.190152	14.8819	0	1.28102	0	0.45036	1.67134	2.83227	4.56365	0.0900721	100	7.39592			0.739	21.5957				2		7				3			71.4	288	10	119	7.39	2.75	878	20.3	36.3	3.99	14.8	2.8	0.65	2.11	0.31	1.76	0.35
Cotopaxi	Main Arc	Cx-10	4	72.0248	0.250225	15.6341	0	1.81163	0	0.610549	2.31208	2.6624	4.57412	0.120108	100	7.23651			0.619048	21.1111				3		12				4			63.6	353	10.5	128	6.5	2.67	912	20.9	36.8	4.02	14.9	2.88	0.72	2.29	0.32	1.84	0.36
Huisla	Main Arc	RIO 107bis	1	54.4776	0.994562	19.0083	8.44363	7.5971	0.131932	4.63791	7.30698	1.4208	4.11018	0.314606	100	5.53098			0.435694	16.4228				16.4616		209.316	90.2026		26.3946	52.9803			23.0848	1007.07	15.5833	113.892	6.78957		874.255	20.5008	37.5881		22.1738	4.30336	1.26765	3.78155		2.80697
Huisla	Main Arc	RIO 108	1	56.238	1.03543	19.0844	8.1007	7.28855	0.121815	3.46158	6.69983	1.44148	4.35489	0.274084	100	5.79637			0.374302	10.6918				16		192	17		22	25			29	742	17.9	125	6.7		670	17	34		20	4.2	1.3	4		3.2
Huisla	Main Arc	RIO 109	1	65.3457	0.535289	17.3212	4.51461	4.06199	0.0807984	1.37357	4.32271	2.35325	4.41361	0.191896	100	6.76687			0.574627	17.623				6.7		75	12		10	10			65.5	596	13.4	158	7.7		1000	21.5	39		18	3.5	0.92	3.2		2.3
Huisla	Main Arc	RIO 109bis	1	65.4132	0.566392	17.9083	4.76799	4.28997	0.0823844	1.46232	3.55283	2.47153	4.06773	0.185365	100	6.53926			0.551576	18.2596				7.86734		78.7908	12.2032		10.1219	8.80934			70.098	468.052	12.3826	161.508	6.82997		1175.09	19.7257	35.4988		16.2376	2.85577	0.864633	2.77222		2.22006
Huisla	Main Arc	RIO 110	1	58.7179	0.82429	19.6405	6.4315	5.7867	0.101764	2.24899	5.81074	1.87246	4.71168	0.28494	100	6.58414			0.393064	15.1316				10		136	15.5		16	20			37	785	17.3	137	6.8		825	23	42		24	4.9	1.35	4.5		3.15
Huisla	Main Arc	RIO 111	1	66.4825	0.540425	16.3147	4.26222	3.8349	0.0713769	1.76403	3.97671	2.7939	4.05829	0.163147	100	6.85218			0.656	20.8696				7.5		76	25		11	16			77.5	516	12.5	175	8.2		1070	24	45		19	3.6	0.89	3.3		2.3
Huisla	Main Arc	RIO 111bis	1	64.9646	0.579587	16.6555	4.70788	4.23588	0.0813456	2.10482	4.59603	2.6539	3.95543	0.172859	100	6.60933			0.608745	20.3784				9.02424		89.2293	36.4338		11.4265	19.0032			69.8384	541.17	13.0162	168.843	7.92357		1068.14	22.7564	41.3848		18.2603	3.30657	0.927715	2.7044		2.2212
Huisla	Main Arc	RIO 112	1	57.0441	0.900962	20.2463	6.83314	6.14807	0.101232	2.18661	6.3776	1.84242	4.80851	0.344188	100	6.65092			0.441176	20.7407				9.6		155	18		18	20			35	1130	17	135	7.5		940	28	46		29	5.5	1.55	5		3.15
Huisla	Main Arc	RIO 113	1	55.6492	1.0283	18.7009	8.31713	7.48328	0.131058	4.03255	7.30899	1.32066	4.10312	0.241953	100	5.42378			0.369697	10.3333				18.2		206	33		24	30			27	728	16.5	106	6.1		625	15.5	30.5		18.3	3.9	1.2	4		2.95
Huisla	Main Arc	RIO 114	1	58.0927	0.893734	19.0934	6.75379	6.07667	0.0914046	2.78276	6.34754	1.8484	4.51945	0.253902	100	6.36786			0.452055	16.3793				11.6		166	23		18.5	26			43.5	877	14.6	120	6.6		885	19	34		20.5	4.25	1.2	4		2.8
Huisla	Main Arc	RIO 115	1	57.2818	0.893104	17.2975	7.64784	6.8811	0.112921	4.71189	7.23722	1.5193	3.81879	0.246373	100	5.33809			0.38	14.0496				17		182	96		25	60			33	785	15	115	5.7		885	17	32		19	4.1	1.15	4		2.7
Huisla	Main Arc	RIO 116	1	56.8089	0.979993	17.7113	8.24827	7.42133	0.132707	4.52226	6.94161	1.39853	3.8281	0.255206	100	5.22663			0.406452	12.3188				18.4		190	71		25	41			31	710	15.5	114	6.3		710	17	33		20	4.2	1.22	3.7		2.95
Huisla	Main Arc	RIO 29A	1	75.7586	0.125394	13.8978	1.26439	1.13762	0.0835957	0.229888	1.44203	3.22888	4.05439	0.0417979	100	7.28328			0.861386	30.1075				1.4		6	3		2	1			89	268	10.1	90	8.7		1350	28	50		18	2.65	0.65	2.25		1.5
Huisla	Main Arc	RIO 30	1	73.3764	0.189494	15.0753	1.57912	1.4208	0.0947472	0.357934	1.76861	3.16877	4.47417	0.0736923	100	7.64294			0.664	20				1.9		8	3		2	1			84	357	12.5	126	8.3		1200	25	47		19.2	3.25	0.75	2.3		1.85
Huisla	Main Arc	RIO 90	1	55.3892	0.960625	18.3439	8.22663	7.40186	0.122633	4.39435	7.43974	1.59423	4.01623	0.337241	100	5.61046			0.475862	15.9664				15.4		216	86		27	56			48.5	1025	14.5	115	6.9		842	19	39		21.5	4	1.27	4		2.6
Huisla	Main Arc	RIO 91	1	56.4161	0.950378	18.7043	7.88612	7.09548	0.121325	3.57908	6.59198	1.72888	4.48902	0.323533	100	6.2179			0.471831	18.6441				11.8		176	66		24	47			33.5	992	14.2	118	6.7		876	22	41		24.5	4.65	1.34	3.85		2.75
Huisla	Main Arc	RIO 93A	1	56.3301	0.965949	17.7938	8.53086	7.67558	0.122015	4.22984	7.01584	1.6472	3.9248	0.294869	100	5.572			0.44	16.5				13		188	57		24	43			30	772	12.5	112	5.5		702	16.5	35		20	4.05	1.22	3.7		2.45
Huisla	Main Arc	RIO 93B	1	58.2211	0.859166	18.5479	7.2271	6.50254	0.111186	2.98181	6.59031	1.61725	4.29583	0.272912	100	5.91308			0.523438	16.0377				12.8		163	28		21	30			36	765	12.8	132	6.7		775	17	36.5		19.5	3.95	1.14	3.7		2.4
Huisla	Main Arc	RIO 93C	1	56.2726	0.886906	17.0857	8.50206	7.64967	0.132526	5.34182	7.21758	1.46798	3.69034	0.254858	100	5.15832			0.425373	12.8926				17.3		194	100		32	75			29.5	742	13.4	108	5.7		632	15.6	32.5		18	3.85	1.12	3.45		2.6
Huisla	Main Arc	RIO 93D	1	59.5836	0.815248	18.0663	6.76354	6.08545	0.110713	2.78795	5.83758	1.9727	4.4587	0.281814	100	6.4314			0.493421	15.7692				12		155	29		21	25			45	750	15.2	148	7.5		900	20.5	39.5		21	3.9	1.2	3.8		2.75
Huisla	Main Arc	RIO 93E	1	57.3973	0.919174	18.2813	7.80276	7.02048	0.122556	3.3703	6.72018	1.70558	4.15671	0.306391	100	5.86229			0.525926	15				13.8		185	27		22	32			34	838	13.5	128	7.1		775	18	38		20.5	4	1.21	3.7		2.6
Huisla	Main Arc	RIO-107	1	55.499	0.966528	18.4658	8.25109	7.427	0.132262	4.47655	6.86743	1.57697	4.27307	0.315393	100	5.85004			0.496477	15.7402	12.35			16.49		194.45	79.82	933.6	26.72	50.43	79.59	72.48	30.29	989.26	15.61	116.58	7.75	0.93	836.23	19.99	39.26	5.36	22.21	4.41	1.33	3.76	0.51	2.79	0.55
Huisla	Main Arc	TG-JB-65	1	57.0899	0.939416	17.2464	7.09667	6.38518	0.112321	5.02383	7.4949	1.44997	3.96188	0.29612	100	5.41185								18.9628		173.369	110.22		20.2772	55.8615				781.698	17.3949	112.736			752.977
Huisla	Main Arc	TG-JB-66	1	57.9763	0.922189	18.9099	6.6884	6.01784	0.0912055	2.96924	6.52626	1.80384	4.48934	0.293884	100	6.29318								13.7423		153.313	26.3852		17.6807	30.722				779.96	14.833	119.633			824.251
Huisla	Main Arc	TG-JB-67	1	55.9741	1.06771	18.5842	7.35308	6.61588	0.130945	4.27083	7.72577	1.30945	4.04923	0.271963	100	5.35868								21.0989		208.076	39.912		23.8377	39.5578				749.04	18.641	109.812			618.452
Huisla	Main Arc	TG-JB-68	1	56.5486	0.912565	17.4705	7.35122	6.61421	0.131815	4.98869	7.33094	1.79471	3.87333	0.334607	100	5.66804								17.6719		178.142	133.66		22.4656	66.7307				958.523	17.2952	108.671			886.703
Huisla	Main Arc	TG-JB-69	1	57.7555	0.876456	17.7508	6.49787	5.84641	0.110816	4.36213	6.97135	1.85366	4.16065	0.312301	100	6.0143								16.3925		166.677	93.915		20.9025	64.3276				859.097	16.9862	111.444			807.632
Ilalo	Main Arc	E05046	8	57.3914	0.762409	17.1943	7.98523	7.18671	0.110349	5.25661	7.03222	1.02323	3.76189	0.280888	100	4.78512			0.300813	11.7273				21.4		172	200			67			15.5	537	12.3	96	3.7	0.41	482	12.9	20	3.2	14.1	3.3	1	3	0.4	2.4	0.5
Ilalo	Main Arc	E05132	8	55.5612	0.884506	17.8121	8.54006	7.68605	0.122001	6.11021	7.42172	0.549004	3.61936	0.233835	100	4.16836			0.362903	8.54545				22.2		183	304			104			4.9	564	12.4	100	4.5	0.26	553	9.4	21.1	2.8	13.4	2.7	1	2.7	0.4	2.3	0.4
Ilalo	Main Arc	E05133	8	56.4757	0.940924	18.7477	8.10409	7.29368	0.111292	3.26794	7.53751	1.26468	4.07734	0.283289	100	5.34202			0.247788	13				19.4		188	39			32			24.6	527	22.6	132	5.6	0.44	578	20.8	25.7	4.4	19.1	4	1.1	3.9	0.5	3.3	0.6
Ilalo	Main Arc	E05134	8	57.1879	0.777448	17.2149	8.05719	7.25147	0.111064	5.2301	7.18887	0.999576	3.75598	0.282708	100	4.75556			0.1875	11.1667				20.4		176	222			77			16.5	529	14.4	93	2.7	0.22	472	13.4	18.5	3.3	14	3.2	0.8	2.9	0.4	2.4	0.5
Ilalo	Main Arc	Il-2	4	57.4046	0.791028	17.2624	0	7.05918	0	5.41704	7.16932	1.02133	3.71483	0.160208	100	4.73616			0.237398	10.6931				21		181	198			76	43	80	16.3	515	12.3	79	2.92	0.29	471	10.8	22.5	2.68	11.9	3.06	1	2.89	0.43	2.5	0.49
Imbabura	Main Arc	CIM-12	1	59.1113	0.631879	17.9372	7.03221	6.32898	0.122299	3.58744	7.11374	1.28414	3.66898	0.214024	100	4.95312			0.199256	10.5414	12.37			19.73		146.64	14.61	929.79	18.38	17.51	37.44	73.23	21.35	1088.64	18.82	93.56	3.75	1.37	787.43	19.08	36.87	4.62	19.05	3.8	1.11	3.3	0.48	2.96	0.64
Imbabura	Main Arc	CIM-35	1	62.1835	0.486125	17.7233	6.13733	5.51955	0.121531	2.46101	6.45129	0.951995	3.90926	0.192425	100	4.86125			0.225827	9.78322	10.97			11.76		110.58	11.89	876.76	12.37	7.47	21.22	74.17	17.14	759.43	15.41	94.62	3.48	0.71	525.29	13.99	27.76	3.53	14.65	2.92	0.88	2.59	0.4	2.43	0.51
Imbabura	Main Arc	CIM-42	1	60.3843	0.569279	17.5867	6.76019	6.07909	0.121988	3.29369	6.86185	1.16906	3.72065	0.21348	100	4.8897			0.205068	12.6914	11.88			15.86		140.15	17.39	910.54	17.33	16.35	23.27	73.58	19.11	1009.08	16.97	97.32	3.48	1.04	756.31	20.56	39.38	4.85	19.47	3.79	1.09	3.18	0.45	2.74	0.57
Imbabura	Main Arc	CIM-48	1	64.3473	0.543924	15.9893	5.18268	4.65928	0.0821018	3.50985	4.98768	1.83703	3.88957	0.153941	100	5.7266			0.484906	17.5568	16.42			11.48		91.42	125.57	557.06	17.43	64.06	21.86	59.93	42.17	517.39	10.6	73.49	5.14	1.96	767.07	15.45	29.96	3.7	14.77	2.87	0.78	2.52	0.34	1.84	0.36
Imbabura	Main Arc	CIM-58	1	59.0932	0.601121	16.2506	7.53948	6.78553	0.122262	5.07387	7.4376	1.04941	3.44371	0.142639	100	4.49312			0.233083	7.58197	12.67			22.56		166.15	185.23	937.92	25.85	51.67	41.69	76.5	23.84	459.73	13.3	84.32	3.1	0.83	517.37	9.25	19	2.47	10.38	2.42	0.76	2.45	0.36	2.18	0.45
Imbabura	Main Arc	CIM-8	1	57.071	0.664318	17.8661	7.95169	7.15652	0.120785	4.49925	7.62959	0.936085	3.90539	0.150981	100	4.84147			0.215753	6.87023	9.8			23.51		233.02	29.62	920.23	25.98	26.66	29.07	71.53	17.92	533.9	14.6	84.97	3.15	0.47	489.16	9	18.62	2.61	11.47	2.69	0.87	2.72	0.4	2.41	0.51
Imbabura	Main Arc	Imb-1	4	59.9059	0.580639	17.8196	0	5.84643	0	3.5439	7.00771	1.41155	3.67404	0.210231	100	5.08559			0.201911	15.1656				19		116	27			17	43	77	21.3	1051	15.7	86	3.17	1.19	813	22.9	39.2	4.59	18.9	3.95	1.15	3.17	0.46	2.82	0.59
Imbabura	Main Arc	Imb-2	4	57.8294	0.630757	17.0204	0	6.85823	0	5.11614	7.80937	0.991189	3.59431	0.15018	100	4.5855			0.206202	7.4087				24		165	101			47	44	76	16.1	475	12.9	73	2.66	0.53	433	8.52	16.5	2.09	9.33	2.5	0.81	2.49	0.39	2.35	0.48
Imbabura	Main Arc	Imb-3	4	59.4854	0.59065	17.7595	0	6.07668	0	3.66403	7.14786	1.33146	3.71409	0.230253	100	5.04555			0.201266	15.4667				20		131	36			19	33	74	21.1	1109	15.8	87	3.18	1.17	858	23.2	40.1	4.67	19.5	4.04	1.21	3.23	0.48	2.87	0.59
Imbabura	Main Arc	Imb-4	4	60.1782	0.540703	17.8632	0	6.18804	0	3.17413	7.25944	0.941224	3.63473	0.220286	100	4.57595			0.191975	9.2517				16		124	17			9	33	77	14.9	785	16.2	77	3.11	0.6	448	13.6	25.4	3.17	13.8	3.12	0.99	2.92	0.48	2.89	0.59
Imbabura	Main Arc	Imb-11	4	59.3772	0.590768	17.5328	0	6.32823	0	3.68479	7.27946	1.26164	3.71483	0.230299	100	4.97647			0.18625	13.4211				19		143	29			15	31	76	17.9	978	16	79	2.98	0.92	705	20.4	35.8	4.24	17.7	3.79	1.13	3.21	0.47	2.84	0.58
Imbabura	Main Arc	Imb-14	4	61.8142	0.480577	17.7513	0	5.46656	0	2.6632	6.65799	1.04125	3.92471	0.20024	100	4.96596			0.201316	9.93007				13		112	22			9	22	72	17.1	783	15.2	85	3.06	0.66	515	14.2	26.3	3.22	13.6	3.05	0.97	2.63	0.42	2.68	0.53
Imbabura	Main Arc	Imb-16	4	61.9381	0.480529	17.6794	0	5.46601	0	2.60286	6.6373	1.03113	3.95435	0.210231	100	4.98548			0.203448	9.85507				13		106	16			10	25	72	16.2	745	14.5	82	2.95	0.63	498	13.6	25.2	3.06	13.1	2.95	0.9	2.57	0.41	2.55	0.53
Imbabura	Main Arc	Imb-21.2	4	63.5172	0.520468	16.665	0	5.0045	0	2.90261	5.7752	1.48133	4.0036	0.130117	100	5.48494			0.247573	8.5618				14		110	63			18	17	72	28.2	462	10.3	75	2.55	1.03	614	7.62	14.5	1.88	8.34	2.25	0.73	2.13	0.32	1.9	0.37
Imbabura	Main Arc	Imb-22	4	56.9226	0.670738	17.9297	0	7.18791	0	4.58504	7.69847	0.99109	3.86425	0.150165	100	4.85534			0.182707	6.40164				24		171	33			23	32	77	17.8	518	13.3	76	2.43	0.62	467	7.81	15.4	2.04	9.32	2.52	0.85	2.47	0.4	2.49	0.51
Imbabura	Main Arc	Imb-26	4	60.2402	0.510511	16.3764	0	5.83584	0	5.13514	6.78679	1.28128	3.71371	0.12012	100	4.99499			0.214815	7.54369				22		141	228			75	30	69	23.3	456	10.8	67	2.32	0.72	504	7.77	14.8	1.83	8.03	2.05	0.68	1.95	0.32	1.98	0.4
Imbabura	Main Arc	Imb-28	4	60.9671	0.510562	16.5682	0	5.60617	0	4.59505	6.7274	1.21133	3.69406	0.120132	100	4.9054			0.257692	8.7957				22		137	200			56	31	71	21.3	442	10.4	69	2.68	0.73	501	8.18	15.5	1.91	8.25	2.13	0.7	2.01	0.32	1.99	0.4
Imbabura	Main Arc	Imb-29	4	60.3203	0.530531	16.2162	0	5.93594	0	5.27528	6.80681	1.15115	3.63363	0.13013	100	4.78478			0.227273	8.00901				19		144	260			65	26	67	24.2	438	12.1	76	2.75	0.84	515	8.89	16.9	2.06	8.98	2.22	0.73	2.16	0.35	2.1	0.43
Imbabura	Main Arc	Imb-30	4	58.7287	0.700701	17.0971	0	6.26627	0	4.79479	7.06707	1.46146	3.69369	0.19019	100	5.15516			0.341228	14.086				19		146	182			52	44	73	27.3	555	11.4	89	3.89	0.81	586	13.1	25.1	3.08	13.1	3.16	0.97	2.78	0.4	2.32	0.44
Imbabura	Main Arc	Imb-32	4	58.1756	0.580755	16.7818	0	6.49845	0	5.59728	7.54981	1.03134	3.65475	0.130169	100	4.68609			0.194545	7.36364				25		158	163			55	40	72	19.9	430	11	68	2.14	0.41	426	7.29	14.2	1.8	8.03	2.12	0.7	2.15	0.34	2.05	0.42
Imbabura	Main Arc	Imb-36	4	60.1562	0.530584	17.6194	0	6.15677	0	3.38372	7.1779	1.0912	3.66403	0.220242	100	4.75523			0.186301	10.5224				18		132	20			11	36	74	15.6	832	14.6	69	2.72	0.76	495	14.1	25.9	3.18	13.4	3.07	0.96	2.66	0.41	2.54	0.53
Imbabura	Main Arc	Imb-38	4	59.1951	0.680749	17.0788	0	5.95655	0	4.66513	6.85754	1.42156	3.95435	0.190209	100	5.37591			0.346789	14.5977				19		158	147			45	39	70	28.2	518	10.9	86	3.78	0.74	545	12.7	24	2.87	12.2	2.88	0.86	2.53	0.37	2.16	0.4
Imbabura	Main Arc	Imb-39	4	60.0781	0.540703	17.9533	0	6.18804	0	3.14409	7.24942	0.911185	3.73486	0.20026	100	4.64604			0.20137	9.48905				16		122	21			13	44	75	13.5	727	14.6	72	2.94	0.51	416	13	24	3.11	13	2.92	0.94	2.67	0.42	2.59	0.52
Imbabura	Main Arc	Imb-42	4	62.5388	0.450496	17.0387	0	5.2758	0	3.21353	6.25688	1.26139	3.83422	0.130143	100	5.09561			0.243363	8.96154				16		107	73			22	17	66	25.5	440	11.3	76	2.75	0.9	556	9.32	17.4	2.11	8.83	2.11	0.69	2.04	0.33	1.99	0.4
Imbabura	Main Arc	Imb-45	4	61.7741	0.480577	17.8714	0	5.32639	0	2.71326	6.71806	1.04125	3.87465	0.20024	100	4.9159			0.202878	10.1538				14		114	17			7	25	73	15.8	720	13.9	77	2.82	0.58	466	13.2	24.5	3	12.8	2.81	0.91	2.55	0.39	2.41	0.49
Licto	Main Arc	RIO10A	1	53.4575	1.00233	16.0474	9.01083	8.10975	0.131619	7.99838	8.30212	1.18457	3.51321	0.253113	100	4.69778			0.390724	11.9375	8.9			21.67		199.79	364.67	982.97	42.52	163.82	57.49	88.59	19	741.68	15.74	113.75	6.15	0.66	561.94	15.28	32.7	4.32	18.94	4.02	1.27	3.74	0.52	2.86	0.55
Mojanda - Fuya Fuya	Main Arc	MOJ 069	15	57.3071	0.766515	17.3979	8.51236	7.66515	0.131114	4.63944	7.47352	0.927887	3.49975	0.191629	100	4.42763			0.206667	7.13287	9.3	0.79	9.1	24		200	160			52			14	490	15	90	3.1		515	10.2	22.5		14		0.9			2.7
Mojanda - Fuya Fuya	Main Arc	MOJ 075A	15	65.4701	0.553042	15.6762	5.51031	4.95726	0.0904977	2.78532	4.58522	2.2725	3.45902	0.15083	100	5.73152			0.282353	11.4483				13.5		125	95			30			56	340	17	72	4.8		920	16.6	33		18.5		0.8			2.8
Mojanda - Fuya Fuya	Main Arc	MOJ 005	15	55.8785	0.706428	16.1066	9.21385	8.29549	0.141286	6.58997	8.41659	0.71652	3.01746	0.131194	100	3.73398			0.166667	4.85075	9	0.55	8.6	24.5		202	280			67			11	381	15	65	2.5		360	6.5	14.5		10		0.82			2.55
Mojanda - Fuya Fuya	Main Arc	MOJ 032B	15	56.708	0.80637	18.9396	8.05362	7.24725	0.120956	3.42707	7.85203	1.0382	3.64883	0.211672	100	4.68703			0.211429	6.70968				20		210	35			24			20	560	17.5	97	3.7		550	10.4	23		14.5	3.2	0.95	3.3		2.7
Mojanda - Fuya Fuya	Main Arc	MOJ 080A	15	60.0524	0.664786	15.975	7.20185	6.4867	0.110798	4.66358	6.98026	1.32957	3.54553	0.191378	100	4.8751			0.253333	8.59259	12.6	0.85	18.3	20.5		180	200			60			27	470	15	110	3.8		620	11.6	26.5		15		0.8			2.4
Mojanda - Fuya Fuya	Main Arc	MOJ 115F	15	62.1439	0.46301	16.2355	6.45194	5.80775	0.120785	4.31807	6.14997	1.19779	3.47257	0.0905888	100	4.67036			0.271429	7.84615	16.4	0.9	15.2	18.5		128	140			33			28	383	14	56	3.8		615	10.2	21.5		15		0.88			2.3
Mojanda - Fuya Fuya	Main Arc	FUY 021A	15	63.8576	0.563154	16.422	5.76227	5.18906	0.0603379	2.73532	5.61142	1.428	3.9823	0.150845	100	5.4103			0.391753	13.3333	14.5	0.8	17.1	11.5		130	65			20			27	470	9.7	79	3.8		670	10	23		13	2.3	0.7	2.4		1.8
Mojanda - Fuya Fuya	Main Arc	FUY 038	15	61.8669	0.553821	17.098	6.93787	6.24308	0.110764	2.96043	6.02155	1.34931	3.64515	0.151042	100	4.99446			0.242424	8.09524	14.5	0.85	17.6	14.5		133	30			15			28	420	13.2	92	3.2		622	10.2	20.5		12.5		0.75			2.1
Mojanda - Fuya Fuya	Main Arc	FUY 051A	15	63.0282	0.482897	15.5533	5.96579	5.37223	0.100604	4.30584	5.87525	1.53924	3.60161	0.140845	100	5.14085			0.266667	11.6667	14.6	0.82	16.7	16.5		140	200			62			33.5	500	12	79	3.2		685	12.6	23.5		13.5	2.5	0.7	2.4		2
Mojanda - Fuya Fuya	Main Arc	FUY 010	15	69.4129	0.301054	15.7953	3.3718	3.03061	0.080281	1.4852	3.83342	1.81636	4.12444	0.120421	100	5.94079			0.444444	16.8571				6.2		56	23			6			33.5	420	9	56	4		800	11.8	24		13		0.6			1.4
Mojanda - Fuya Fuya	Main Arc	MOJ-10	1	69.4026	0.301299	15.7922	3.36623	3.03377	0.0831169	1.48571	3.83377	1.81818	4.12468	0.124675	100	5.94286			0.538095	16.5	20.02			6.14		48.37	18.26	553.02	6.66	8.21	6.36	57.51	35.81	439.74	8.4	56.21	4.52	1.71	792.71	11.55	23.19	2.93	11.6	2.29	0.65	1.92	0.26	1.42	0.26
Mojanda - Fuya Fuya	Main Arc	MOJ-110B	1	64.2516	0.529375	15.8294	5.77123	5.18995	0.0934191	3.04131	5.53249	1.97218	3.42537	0.134939	100	5.39755			0.154605	4.13793	8.42	0.57		24.99		202.46	301.95	1077.2	36.35	69.11	41.19	41.19	11.86	397.33	15.2	66.8	2.35	0.44	408.73	6	13.63	2.1	9.75	2.59	0.84	2.77	0.43	2.69	0.55
Mojanda - Fuya Fuya	Main Arc	MOJ-120	1	62.3796	0.568009	16.736	6.13653	5.5178	0.0912871	3.36748	5.93366	0.963587	4.30064	0.142002	100	5.26423			0.245704	7.18812	14.93			14.96		134.29	88.04	680.87	17.32	28.43	17.85	69.79	16.2	490.16	11.64	86.71	2.86	0.68	468.37	7.26	15.8	2.21	9.64	2.32	0.73	2.29	0.34	1.97	0.4
Pasochoa	Main Arc	PAS-5	6	55.9057	0.752185	16.5684	9.15837	8.24355	0.142305	6.24111	7.87762	0.660703	3.45599	0.15247	100	4.11669			0.200135	6.39683	7.65			23.67		200.33	196.11	997.87	32.68	86.9	44.57	79.38	11.57	433.89	14.79	78.98	2.96	0.45	341.14	8.06	15.79	2.49	11.16	2.83	0.91	2.89	0.44	2.63	0.52
Puñalica	Main Arc	PUN 17A	1	56.5524	0.745968	14.8488	7.93347	7.1371	0.120968	7.47984	8.23589	1.26008	3.40726	0.211694	100	4.66734			0.263566	16.5323	8.5	0.83	6.5	20.2		184	315			138			21.5	910	12.9	95	3.4		525	20.5	43		22	4.35	1.15	3.5		2.45
Puñalica	Main Arc	PUN 18	1	55.1679	0.766361	16.1944	8.24846	7.4216	0.121004	5.81829	9.15599	1.45205	3.64021	0.262176	100	5.09227			0.242604	19.5122				26		220	156			41			20	1145	16.9	102	4.1		645	32	60		30	6.05	1.48	4.3		3.1
Puñalica	Main Arc	RIO17A	1	56.55	0.742474	14.8495	7.93328	7.13995	0.12205	7.47559	8.23841	1.26119	3.40724	0.213588	100	4.66843			0.254198	16.5207	8.28	0.84		20.25		172.27	260.76	725.1	32.47	134.44	56.24	77.31	21.32	920.4	13.1	92.56	3.33	0.66	541.32	19.99	44.22	5.43	22.15	4.18	1.18	3.28	0.43	2.42	0.46
Puñalica	Main Arc	RIO-19	1	60.1473	0.736704	15.39	7.0441	6.33767	0.100918	4.99546	6.86245	1.31194	3.90554	0.211929	100	5.21748			0.398607	23.4353	11.44			15.91		149.88	246.85	724.05	24.21	64.6	49.66	79.03	32.09	657.01	11.49	113.67	4.58	1.27	591.1	19.92	39.51	4.92	20.08	3.96	1.09	3.13	0.41	2.18	0.39
Puñalica	Main Arc	RIO-20A	1	57.0189	0.756888	15.3396	7.82117	7.03401	0.11101	6.71107	7.97255	1.20093	3.64315	0.211929	100	4.84408			0.304089	17.2035	8.25			20.05		176.6	258.27	831.04	28.55	110.63	45.2	63.97	19.76	867.42	13.45	96.36	4.09	0.33	498.46	19.44	39.32	4.99	20.72	4	1.13	3.26	0.44	2.43	0.46
Sangay	Main Arc	SAN-31	3	59.2697	0.687772	17.8517	6.25063	5.62355	0.111257	3.2568	5.96743	2.4072	4.49075	0.333772	100	6.89795			0.633094	25.3968				10.9		152	43		18	43			50	1415	13.9	112	8.8		1348	32	59.5		30		1.33	3.6		2.4
Sangay	Main Arc	SAN 36	3	57.6392	0.856078	17.2021	7.22127	6.50619	0.110787	4.72354	6.59684	1.95387	4.10918	0.302145	100	6.06305			0.507353	20				15		175	128			88			42.5	950	13.6	103	6.9		1005	22.6	45		23.3		1.25	3.7		2.5
Sangay	Main Arc	SAN 64	3	55.719	0.866673	17.4443	7.68921	6.91323	0.120931	5.73415	7.22564	1.64265	4.04112	0.29225	100	5.68376			0.384615	14.2308				16.8		182	172			110			28.5	915	14.3	108	5.5		854	18.5	38		21.6		1.21	3.6		2.7
Sangay	Main Arc	SAN 53B	3	57.2062	0.86615	17.2726	7.18098	6.46591	0.110787	4.48182	6.75798	2.17545	4.32068	0.342431	100	6.49612			0.471014	23				15		188	88			67			40.5	1240	13.8	119	6.5		1145	27.6	53		28		1.36	3.9		2.45
Sangay	Main Arc	SAN 04	3	61.0642	0.643734	17.4512	5.87407	5.29069	0.100583	2.94709	5.59244	2.14243	4.49608	0.271575	100	6.6385			0.601504	19.6				10.2		122	33			29			51.5	950	13.3	124	8		942	24.5	46.5		22.7		1.1	3.3		2.38
Sangay	Main Arc	SAN-20B	1	50.2788	1.01368	14.7998	9.68069	8.70755	0.152053	11.1201	8.92043	1.31779	3.34516	0.344653	100	4.66295			0.636638	15.6385	10.64			25.05		237.99	580.71	1188.47	49.67	287.07	145.72	103.33	25.99	1046.23	16.54	102.74	10.53	0.7	719.82	20.33	42.87	5.65	23.92	4.72	1.38	3.92	0.53	2.88	0.56
Sangay	Main Arc	SAN 21	3	54.0385	0.988202	18.0801	8.33922	7.50227	0.131088	5.0721	8.33922	1.4218	4.11415	0.312595	100	5.53595			0.374233	13.4058				19		212	75			46			28	920	16.3	96	6.1		700	18.5	38		21.4		1.3	4		2.9
Sangay	Main Arc	SAN 28	3	61.5911	0.673841	17.1075	5.65222	5.08901	0.0905159	3.11777	5.43096	2.35341	4.30454	0.241376	100	6.65795			0.449612	17.094				10.9		130	56			44			62	880	12.9	113	5.8		1150	20	40		19.4		1.04	3.3		2.2
Sangay	Main Arc	SAN 48	3	62.9749	0.522613	17.7487	4.97487	4.47236	0.110553	1.8794	4.59296	2.75377	4.65327	0.291457	100	7.40704			0.646154	21.9841				6.4		90	7			8.5			66.5	963	13	139	8.4		1295	27.7	50.5		23.6		1.08	3.15		2
Sangay	Main Arc	SAN 73F	3	58.3283	0.81571	17.1501	6.93857	6.24371	0.110775	4.34038	6.68681	1.92346	4.11883	0.281974	100	6.0423			0.514286	17.9167				15		167	84			67			46.5	914	14	115	7.2		904	21.5	42.5		23.8		1.17	3.6		2.5
Sangay	Main Arc	SAN-26B	1	65.7287	0.451885	16.5862	3.91291	3.52265	0.0821608	1.86916	3.90264	3.21454	4.3956	0.246482	100	7.61015			0.8	18.2166	21.61			6.87		73.3	38.57	576.71	11	26.09	49.37	54.88	109.3	834.56	15.6	169.86	12.48	5.89	1179.84	28.6	54.85	6.22	22.7	3.9	0.88	3.02	0.44	2.44	0.5
Sangay	Main Arc	SAN 29A	3	55.719	0.947294	17.2831	7.80006	7.01401	0.120931	5.34113	7.45742	1.63257	4.13181	0.352716	100	5.76439			0.482759	17.6423				16		190	129			91			33	1000	14.5	105	7		840	21.7	44		23.4		1.31	3.8		2.75
Sangay	Main Arc	SAN 60C	3	54.7727	0.917246	16.7322	8.02338	7.22709	0.120956	6.31993	7.97299	1.5321	4.06209	0.342707	100	5.59419			0.461538	16.6406	11	1.06	10.4	20		203	210			118			29.5	1020	14.3	106	6.6		830	21.3	43.5		24.7		1.28	3.8		2.8
Sangay	Main Arc	SAN 77A	3	60.1086	0.694025	17.6624	5.92436	5.33092	0.100583	2.99738	5.77349	2.57493	4.45584	0.30175	100	7.03078			0.52518	19.3077				10.7		135	32			36			66	1065	13.9	122	7.3		1066	25.1	49		24.7		1.15	3.4		2.2
Sangay	Main Arc	Sg-13	4	63.8611	0.490392	17.1737	0	3.84307	0	2.60208	4.5036	2.98239	4.26341	0.280224	100	7.2458			0.705128	19.6528				9		85	61			37	65	59	96.6	894	15.6	140	11	4.63	1054	28.3	49.6	5.46	21.1	4.11	0.98	3.19	0.46	2.69	0.53
Soche	Main Arc	SOC-5E	1	58.5563	0.847458	16.7245	7.74964	6.97366	0.224627	3.61446	7.04513	1.90933	3.78803	0.31652	100	5.69737			0.529032	20.4545		1.45		16		163	103		26	55			46	785	15.5	133	8.2		1050	27	51		26.5	5.3	1.36	3.9		3
Soche	Main Arc	SOC 01A	1	65.3637	0.633039	16.4891	4.71262	4.24035	0.0703376	1.94936	4.02934	2.51206	4.51166	0.200965	100	7.02371			0.826087	40		1.6		6.8		90	28			12			62.5	592	9.2	66	7.6		1020	26	49		21.5	3.8	1.07	3.35		1.8
Soche	Main Arc	SOC 01B	1	64.2771	0.693746	16.3986	5.30867	4.77579	0.0804343	2.38287	4.444	2.37281	4.36356	0.21114	100	6.73638			0.735294	35.2113		1.55		9		110	45			18			59.5	565	10.2	87	7.5		1030	25	47		22	4.15	1.07	3.3		1.95
Soche	Main Arc	SOC 02	1	64.1608	0.703518	16.9347	5.14573	4.63317	0.0703518	1.98995	4.36181	2.36181	4.54271	0.241206	100	6.90452			0.92	41.4286		1.65		6.4		99	21			12			52	702	10	83	9.2		970	29	49		25	4.5	1.18	3.6		2
Soche	Main Arc	SOC 03A	1	63.4691	0.754148	17.0639	5.44997	4.90699	0.0703871	2.14178	4.545	2.2725	4.53494	0.241327	100	6.80744			1	50.9091		1.65		6.8		104	29			16			47	738	9.1	100	9.1		1120	28	52		24.5	4.5	1.19	3.45		1.78
Soche	Main Arc	SOC-3B	1	64.1609	0.717389	16.5707	5.35516	4.81964	0.0707285	2.14206	4.44579	2.32394	4.48621	0.262706	100	6.81014			0.988889	48.1818		1.67		6.5		98	30		12.5	17			51	720	9	95	8.9		1080	26.5	50		23.5	4	1.21	3.15		1.75
Soche	Main Arc	SOC 06A1	1	66.4624	0.612696	17.266	4.29892	3.86701	0.0602652	1.46645	3.90719	2.2499	3.90719	0.200884	100	6.15709			1.175	62.5		2		4.8		76	15			6			59.5	576	8	56	9.4		1500	30	52		25	4.4	1.09	2.95		1.6
Soche	Main Arc	SOC 06A2	1	67.9486	0.542223	16.5478	4.10684	3.69515	0.0502058	1.37564	3.2935	2.53037	3.81564	0.200823	100	6.34602			0.975	55.102		1.8		4.6		69	14			7			64	545	8	54	7.8		1200	27	47		21	3.7	0.97	2.8		1.55
Soche	Main Arc	SOC 08A	1	67.6406	0.572289	16.5663	3.9759	3.5743	0.060241	1.3755	3.44378	2.5502	4.04618	0.170683	100	6.59639			1.0125	54.386		1.82		4.4		65	14			7			64	570	8	55	8.1		1080	31	50		25	4.25	1.03	2.65		1.65
Soche	Main Arc	SOC 08B1	1	67.9181	0.552098	16.2116	3.84461	3.46316	0.0602289	1.33507	3.4732	2.58984	4.20598	0.190725	100	6.79582			1.05405	62.2222		1.88		4.5		66	14			6			54.5	568	7.4	55	7.8		1190	28	51		22.5	4.15	0.96	2.7		1.5
Soche	Main Arc	SOC 08C	1	66.6935	0.592965	17.1859	5.02513	4.52261	0.0502513	1.74874	3.60804	2.1206	3.26633	0.211055	100	5.38693			1.13333	48.1481		1.76		6.7		91	28			11			53	530	7.5	63	8.5		1160	26	50		20	3.55	0.96	2.6		1.55
Tungurahua	Main Arc	TU 06 10 12 01	16	57.1636	0.887978	16.4175	7.53773	6.78245	0.121088	5.59023	7.29555	1.65487	3.84454	0.242176	100	5.49941			0.366038	11.6667				19.3		177	200			75.7			42.7	585	15.9	135	5.82		710	16.8	34.9		18.5	4.03	1.15	3.56		2.93
Tungurahua	Main Arc	TU 06 10 12 02	16	57.2444	0.878198	16.5949	7.59086	6.83026	0.121131	5.38022	7.177	1.55451	3.95694	0.26245	100	5.51145			0.350658	12.2388				19.9		183	185			62.5			41.6	661	15.2	126	5.33		759	16.4	34		18.3	3.84	1.15	3.45		2.79
Tungurahua	Main Arc	TU 06 10 12 03	16	57.2112	0.871288	16.4835	7.74028	6.9647	0.121575	5.19733	7.49713	1.59061	3.79922	0.263413	100	5.38983			0.322807	10.3871				20.2		181	150			54.6			39.8	517	17.1	136	5.52		683	16.1	33.9		18	3.87	1.15	3.63		3.11
Tungurahua	Main Arc	TU 06 10 12 04	16	57.4037	0.881731	16.4083	7.48965	6.73919	0.121618	5.23971	7.14506	1.69252	4.12488	0.243236	100	5.8174			0.366049	11.5068				19.4		176	178			64.7			47.1	570	16.2	139	5.93		695	16.8	35.7		19.1	4.05	1.15	3.62		2.98
Tungurahua	Main Arc	TU 06 10 12 05	16	57.2796	0.882161	16.5583	7.57441	6.81546	0.121677	5.39436	7.1384	1.60208	3.95451	0.253494	100	5.5566			0.350649	12.406				19.7		183	422			873			42.3	665	15.4	128	5.4		760	16.5	34.1		18.3	3.89	1.15	3.45		2.77
Tungurahua	Main Arc	TU 06 10 12 06	16	57.4787	0.908196	17.0943	7.37657	6.63744	0.111002	4.60153	7.15457	1.67512	4.0667	0.272459	100	5.74182			0.362424	12.0134				17.8		176	96.3			40			44.5	659	16.5	142	5.98		766	17.9	37.2		19.8	4.2	1.21	3.7		3.06
Tungurahua	Main Arc	TU 06 10 12 07	16	57.5047	0.937741	16.6273	7.50193	6.75023	0.110916	5.0517	6.92718	1.7444	4.08371	0.262164	100	5.82811			0.406711	14.2969				17.6		181	173			60.9			42.9	664	14.9	135	6.06		752	18.3	37.7		20	4.15	1.23	3.57		2.72
Tungurahua	Main Arc	TU 06 10 12 08	16	57.9295	0.952154	16.7235	7.54633	6.79019	0.121552	4.67974	6.78663	1.88405	3.85926	0.273491	100	5.74331			0.450588	12.5166				17.2		169	123			52.7			51.1	572	17	152	7.66		745	18.9	40		20.8	4.33	1.21	3.87		3.14
Tungurahua	Main Arc	TU 06 10 12 09	16	57.9017	0.887691	16.4526	7.31337	6.58057	0.110961	4.963	6.82917	1.75521	4.26697	0.252185	100	6.02218			0.3575	12.1379				18.5		176	151			62.9			46.4	574	16	142	5.72		714	17.6	37.1		19.7	4.12	1.17	3.62		2.92
Tungurahua	Main Arc	TU 06 10 12 2b	16	57.9856	0.887432	16.5385	7.523	6.7692	0.121013	4.89096	7.0087	1.73453	3.81192	0.252111	100	5.54645			0.44375	11.2687				13.7		177	158			62.5			28.4	445	14.4	139	6.39		628	15.1	33.8		17.8	3.81	1.12	3.43		2.89
Tungurahua	Main Arc	TU 07 10 12 01	16	61.2369	0.826979	16.3504	6.29494	5.66419	0.10285	3.57861	5.68618	2.22522	4.10244	0.226171	100	6.32766			0.383034	12.3525				13.831		134.331			19.8691	33.2703			69.8671	530.342	17.6546	183.502	6.7623		987.672	20.3136	45.786		22.3351	4.52226	1.15377	3.94077		3.19399
Tungurahua	Main Arc	TU 07 10 12 02	16	58.0494	0.878313	16.5567	7.52119	6.76756	0.121147	4.94682	6.84479	1.74653	3.8565	0.232198	100	5.60303			0.43913	11.76				12.8		175	157			63.3			26.7	440	13.8	134	6.06		666	14.7	32.6		17.2	3.8	1.09	3.31		2.76
Tungurahua	Main Arc	TU 07 10 12 03	16	58.0979	0.894595	16.8753	7.52273	6.76895	0.12199	4.59497	6.86195	1.70786	3.82236	0.254146	100	5.53022			0.383721	12.1854				17.5		176	148		26	61			44	580	17.2	146	6.6		800	18.4	38.5		19.5	4.2	1.14	3.9		3.2
Tungurahua	Main Arc	TU 07 10 12 04	16	58.1486	0.886842	16.981	7.45753	6.71029	0.110855	4.3032	6.86295	1.75353	4.00087	0.241866	100	5.75439			0.343023	12.5				17		179	107		23.5	48			44.5	586	17.2	146	5.9		780	18.5	38		20	4.3	1.17	3.5		3
Tungurahua	Main Arc	TU 07 10 12 05	16	58.1876	0.902211	16.7771	7.52181	6.76812	0.111509	4.58202	6.69056	1.77401	3.95351	0.25343	100	5.72752			0.370588	12.5333				17		175	145		26	63			45	586	17	148	6.3		800	18.8	37		20	4.2	1.13	3.6		3.05
Tungurahua	Main Arc	TU 07 10 12 06	16	58.2207	0.894141	16.6229	7.51891	6.76552	0.121928	4.63327	6.78734	1.7578	3.94235	0.254017	100	5.70015			0.370588	11.519				17		175	145		26	62			44.5	585	17	144	6.3		800	18.2	36		19.6	4.1	1.11	3.6		3
Tungurahua	Main Arc	TU 07 10 12 08	16	58.2414	0.893704	16.8699	7.46092	6.71334	0.110458	4.30786	6.9488	1.71712	3.9564	0.240999	100	5.67352			0.362069	12.3333				17.5		183	114		23.5	48			44.5	580	17.4	147	6.3		780	18.5	38.5		20	4.3	1.17	3.4		3.05
Tungurahua	Main Arc	TU 07 10 12 09	16	58.2414	0.893704	16.8699	7.46092	6.71334	0.110458	4.30786	6.9488	1.71712	3.9564	0.240999	100	5.67352			0.406897	12.5781				13.7		173	100			44.7			28.7	509	14.5	139	5.9		696	16.1	35		18.5	3.98	1.13	3.48		2.82
Tungurahua	Main Arc	TU 07 10 12 10	16	58.2691	0.875546	16.9071	7.36667	6.62853	0.110701	4.3576	6.92386	1.70077	3.97518	0.251594	100	5.67596			0.358824	12.9577				17.3		181	112		24	51			42	584	17	145	6.1		780	18.4	39		20.4	4.05	1.13	3.9		2.95
Tungurahua	Main Arc	TU 07 10 12 11	16	58.3422	0.885192	16.6476	7.49395	6.74306	0.110649	4.49637	6.91053	1.71003	3.91295	0.241416	100	5.62298			0.362573	12.7397				18		185	114		25	53			42	574	17.1	145	6.2		763	18.6	39		20.2	4.45	1.13	4		3
Tungurahua	Main Arc	TU 07 10 12 12	16	58.508	0.884657	16.8387	7.3889	6.64853	0.110582	4.22223	6.88625	1.71905	3.94075	0.24127	100	5.6598			0.44	11.8699				12.5		172	94.6			44.2			22.3	421	13.5	139	5.94		599	14.6	33.2		17.4	3.81	1.09	3.35		2.75
Tungurahua	Main Arc	TU 07 10 12 13	16	61.5891	0.741838	16.4528	5.92311	5.32962	0.0991077	3.61995	5.70936	2.10531	4.15216	0.20074	100	6.25747			0.385532	12.9167				13.0737		122.895			18.5745	40.6328			66.507	508.782	15.2451	164.271	5.87747		942.168	18.5258	40.9385		19.2328	3.91272	1.04834	3.35519		2.78349
Tungurahua	Main Arc	TU 07 10 12 14	16	58.597	0.865866	16.8643	7.4102	6.6677	0.11075	3.96687	6.79604	1.7418	4.12797	0.261773	100	5.86977			0.453543	13.3043				11.4		159	73.1			38.3			23.4	492	12.7	136	5.76		661	15.3	33.8		17.9	3.83	1.11	3.32		2.56
Tungurahua	Main Arc	TU 07 10 12 15	16	58.6726	0.866983	16.5836	7.29879	6.56745	0.110893	4.60711	6.704	1.72388	3.93167	0.231868	100	5.65555			0.343558	12.766				17.5		178	135		24	58			45	582	16.3	140	5.6		778	18	37		19.5	4.15	1.15	3.3		2.85
Tungurahua	Main Arc	TU 07 10 12 15	16	59.1454	0.824859	16.4259	7.02658	6.32251	0.112018	4.38906	6.59887	1.91449	4.00209	0.26477	100	5.91658			0.362069	12.2078				17.4		158	122			46.4			54.2	542	17.4	157	6.3		784	18.8	38.4		19.6	4.04	1.17	3.69		3.1
Tungurahua	Main Arc	TU 07 10 12 16	16	59.3287	0.83304	16.7624	6.74559	6.06968	0.111749	4.15504	6.4713	1.8591	4.15504	0.253976	100	6.01414			0.355844	11.8978				18.6		176	172			63.1			42.6	633	15.4	129	5.48		738	16.3	36.5		18.8	3.93	1.16	3.44		2.86
Tungurahua	Main Arc	TU 08 10 12 01	16	62.9281	0.692464	16.7767	5.65917	5.09212	0.0983939	2.57342	5.11397	2.21495	4.29418	0.215688	100	6.50913			0.405484	14.1608				9.06624		100.287			16.0587	16.9049			72.8386	561.57	15.5542	177.41	6.30697		1050.03	20.2262	44.7228		20.869	4.21839	1.11523	3.58901		2.88702
Tungurahua	Main Arc	TU 08 10 12 02	16	62.8558	0.686475	16.2302	5.44834	4.90242	0.0942705	3.29478	5.37989	2.26493	4.09993	0.191278	100	6.36486			0.400053	13.4876				12.1505		110.101			17.2396	35.2303			71.7226	504.434	15.2758	171.52	6.11115		1008.97	19.5827	42.9666		19.8084	3.92409	1.03031	3.37622		2.82524
Tungurahua	Main Arc	TU 08 10 12 03	16	61.0299	0.76645	16.3612	6.38708	5.7471	0.102193	3.6994	5.83524	2.13584	4.07751	0.245264	100	6.21335			0.399401	13.4641				13.8		135	85.8			36.5			62	524	16.7	169	6.67		881	20.6	41.7		20.5	4.18	1.15	3.71		3.04
Tungurahua	Main Arc	TU 08 10 12 05	16	60.4786	0.762251	17.0503	6.35878	5.72163	0.100296	3.49031	5.76703	2.02598	4.35285	0.25074	100	6.37883			0.534167	14.6552				9.07		137	83.8			39.3			21.6	498	12	150	6.41		785	17	36.1		18.3	3.76	1.05	3.17		2.47
Tungurahua	Main Arc	TU 08 10 12 06	16	61.7304	0.714985	16.3137	6.10255	5.49107	0.100702	3.67563	5.69974	2.10467	3.97773	0.191334	100	6.08241			0.381579	14.0714				13.2		130	112		19	47			58	505	15.2	154	5.8		880	19.7	37		19.5		0.98			2.7
Tungurahua	Main Arc	TU 08 10 12 07	16	61.7304	0.714985	16.3137	6.10255	5.49107	0.100702	3.67563	5.69974	2.10467	3.97773	0.191334	100	6.08241			0.381579	14.0714				13.2		130	112		19	47			58	505	15.2	154	5.8		880	19.7	37		19.5		0.98			2.7
Tungurahua	Main Arc	TU 09 10 12 01	16	61.7304	0.714985	16.3137	6.10255	5.49107	0.100702	3.67563	5.69974	2.10467	3.97773	0.191334	100	6.08241			0.507438	12.8689				9.63		128	110			46.2			25.7	388	12.1	155	6.14		772	15.7	33.2		16.4	3.35	0.95	2.98		2.5
Tungurahua	Main Arc	TUNG-MAA-01	1	65.834	0.591354	16.2215	4.323	3.88458	0.0815661	1.98817	4.12928	2.61011	4.46574	0.193719	100	7.07586			0.453655	14.8947	19.39	1.38		7.45	3025.76	71.87			11.06	12.74	24.34	67.49	85.67	499.48	15.32	194.8	6.95	3.92	1194.75	22.64	48.98	5.7	21.44	4.09	1.04	3.38	0.47	2.78	0.54
Tungurahua	Main Arc	TUNG-MAA-03	1	61.2508	0.824452	16.3483	6.29399	5.66057	0.100543	3.57933	5.69073	2.222	4.10215	0.221194	100	6.32415			0.383003	12.3841	16.97	1.33		13.83	4369.76	134.33			19.87	33.27	38.99	77.02	69.87	530.34	17.65	183.5	6.76	3.01	987.67	20.31	45.79	5.58	22.34	4.52	1.15	3.94	0.55	3.19	0.61
Tungurahua	Main Arc	TUNG-MAA-04	1	62.9274	0.687841	16.7813	5.65446	5.088	0.101153	2.56929	5.11835	2.21525	4.29901	0.212422	100	6.51426			0.405788	14.1469	17.81	1.32		9.07	3651.17	100.29			16.06	16.9	27.64	72.51	72.84	561.57	15.55	177.41	6.31	3.33	1050.03	20.23	44.72	5.31	20.87	4.22	1.12	3.59	0.5	2.89	0.55
Tungurahua	Main Arc	TUNG-MAA-05	1	64.7459	0.630081	15.9858	4.86789	4.38008	0.0914634	2.72358	4.63415	2.44919	4.16667	0.193089	100	6.61585			0.438347	14.7687	19	1.35		10.04	3435.53	93			14.41	25.41	32.62	67.81	82.72	482.51	15.49	191.53	6.79	3.7	1118.24	21.71	47	5.46	20.93	4.01	1.03	3.4	0.48	2.78	0.55
Tungurahua	Main Arc	TUNG-MAA-07	1	62.8638	0.687146	16.2288	5.44665	4.90097	0.0909458	3.29426	5.37591	2.26354	4.10267	0.191997	100	6.36621			0.399869	13.5034	17.53	1.28		12.15	3698.84	110.1			17.24	35.23	38.02	71.75	71.72	504.43	15.28	171.52	6.11	3.12	1008.97	19.58	42.97	5.06	19.81	3.92	1.03	3.38	0.47	2.83	0.54
Tungurahua	Main Arc	TUNG-MAA-08	1	56.0857	0.919935	16.4072	7.97614	7.17752	0.131419	6.00485	7.99636	1.44561	3.59887	0.232511	100	5.04448			0.302813	9.48718	12.31	1.03		21.44	5245.22	197.22			30.83	64.8	50.16	82.5	35.6	637.54	16.71	125.57	5.06	1.54	731.09	14.8	31.92	4.39	18.36	3.96	1.17	3.57	0.51	3	0.6
Tungurahua	Main Arc	TUNG-MAA-09	1	64.9105	0.596623	16.4627	4.74264	4.26737	0.0910102	2.18425	4.56062	2.44716	4.25726	0.222469	100	6.70442			0.435361	14.2179	19.48	1.38		8.42	3269.91	78.67			10.67	11.45	17.02	70.88	79.54	548.83	15.78	189.79	6.87	3.54	1151.9	22.18	48.35	5.6	21.55	4.11	1.08	3.45	0.48	2.81	0.55
Tungurahua	Main Arc	TUNG-MAA-10	1	61.5855	0.742599	16.4476	5.92072	5.32865	0.100351	3.62268	5.70998	2.10738	4.15454	0.200702	100	6.26192			0.385574	12.958	16.48	1.19		13.07	3908.32	122.9			18.57	40.63	45.82	71.53	66.51	508.78	15.25	164.27	5.88	2.88	942.17	18.53	40.94	4.89	19.23	3.91	1.05	3.36	0.47	2.78	0.55
Tungurahua	Main Arc	TUNG-PS-07B	17	58.6784	0.866324	16.581	7.30331	6.56795	0.110809	4.60361	6.70898	1.72257	3.92868	0.231691	100	5.65125			0.343558	12.766	13	1.16		17.5		178	135			58			45	582	16.3	140	5.6		778	18	37		19.5	4.15	1.15	3.3		2.85
Tungurahua	Main Arc	TUNG-PS-07C	17	56.8851	0.877016	16.7238	7.97379	7.17742	0.131048	4.90927	8.09476	1.41129	3.57863	0.211694	100	4.98992			0.266667	9.26829	11.5	0.98		23		207	116			38			37	523	18	122	4.8		644	15.2	31		17.1	3.85	1.07	3.45		3.1
Tungurahua	Main Arc	TUNG-3	17	61.7366	0.714358	16.3095	6.10725	5.49351	0.100614	3.6724	5.7048	2.10283	3.97424	0.191166	100	6.07707			0.381579	14.0714				13.2		130	112			47			58	505	15.2	154	5.8		880	19.7	37		19.5		0.98			2.7
Tungurahua	Main Arc	TUNG-PS-03B	17	65.6686	0.582739	15.7842	4.78248	4.31026	0.0803778	2.29077	4.38059	2.55199	4.1696	0.18085	100	6.72159			0.429448	16.0959	18.8	1.4		9		96	61			24			78.5	455	16.3	192	7		1145	23.5	45		21	4	0.97	3.4		2.7
Tungurahua	Main Arc	TUNG-PS-12B	17	65.9737	0.552375	16.4407	4.36879	3.92689	0.0803455	1.65713	3.9068	2.71166	4.56965	0.180777	100	7.28131			0.426829	16.5333	19.9	1.47		7		75	22			10			79	509	16.4	200	7		1170	24.8	46		22	4.1	0.97	3.65		2.65
Tungurahua	Main Arc	TUNG-PS-01B	17	56.9801	0.866848	16.7019	7.89235	7.10614	0.131035	4.95918	7.99315	1.40107	3.63875	0.221752	100	5.03981			0.291209	12.4	11.9	0.97		24		215	130			42			36.5	530	18.2	124	5.3		650	15.5	31		17	3.7	1.08	3.4		3.1
Tungurahua	Main Arc	TUNG-PS-25B	17	58.2653	0.876398	16.9034	7.36376	6.62839	0.110809	4.36184	6.92052	1.70243	3.97905	0.251838	100	5.68147			0.358824	12.9577				17.3		181	112			51			42	584	17	145	6.1		780	18.4	39		20.4	4.05	1.13	3.9		2.95
Tungurahua	Main Arc	TUNG-PS-36A	17	58.1503	0.886561	16.9857	7.45517	6.70965	0.11082	4.30183	6.86077	1.75297	3.9996	0.241789	100	5.75257			0.343023	12.5	13.5	1.15		17		179	107			48			44.5	586	17.2	146	5.9		780	18.5	38		20	4.3	1.17	3.5		3
Tungurahua	Main Arc	TUNG-PS-36D2	17	66.198	0.532235	16.3286	4.26793	3.84615	0.0803374	1.57662	3.92649	2.77164	4.55915	0.180759	100	7.33079			0.452941	15.8228	19.5	1.49		6.8		73	21			9			81.5	500	17	203	7.7		1225	25	49		22.5	4.4	1.02	3.2		2.85
Tungurahua	Main Arc	TUNG-PS-40	17	58.2351	0.896545	16.8631	7.46449	6.71905	0.110809	4.31147	6.95074	1.7125	3.9589	0.241765	100	5.6714			0.362069	12.3333	13.4	1.11		17.5		183	114			48			44.5	580	17.4	147	6.3		780	18.5	38.5		20	4.3	1.17	3.4		3.05
Tungurahua	Main Arc	TUNG-PS-48C	17	62.6232	0.7242	16.556	5.82378	5.24039	0.090525	2.66546	5.3108	2.38383	4.16415	0.2414	100	6.54798			0.405556	14.6154	16.3	1.42		10.8		123	59			27			71.5	540	18	193	7.3		1040	22.8	46.5		22.5	4.75	1.14	3.95		3.1
Tungurahua	Main Arc	TUNG-PS-51A	17	62.1779	0.77496	16.3043	6.33052	5.69646	0.100644	2.93881	5.36433	2.30475	4.09622	0.241546	100	6.40097			0.4375	14.1026	17	1.36		12		144	68			30			68	522	17.6	189	7.7		1010	22	44.5		22	4.55	1.13	3.8		3.1
[truncated: 16 more columns]

## Sheet: FC model values
Fractional crystallisation model results and input partition coefficients
	F (melt rem) =	1	0.9	0.8	0.7	0.6	0.5
	cryst. (%)	0	10	20	30	40	50
apatite	La/Yb	2.47525	3.46771	5.05511	7.75006	12.6921	22.7465
	Nb/Y	0.0583333	0.109753	0.222474	0.495648	1.24965	3.73075
clinopyoxene	La/Yb	2.47525	2.98301	3.67491	4.65533	6.11664	8.44778
	Nb/Y	0.0583333	0.0707231	0.0877139	0.111964	0.148408	0.207109
orthopyroxene	La/Yb	2.47525	2.5012	2.53054	2.56421	2.60364	2.65107
	Nb/Y	0.0583333	0.0595662	0.0609752	0.062613	0.0645586	0.0669378
plagioclase	La/Yb	2.47525	2.45706	2.43688	2.41421	2.3883	2.35801
	Nb/Y	0.0583333	0.0583948	0.0584636	0.0585418	0.0586321	0.0587391
Ilmenite	La/Yb	2.47525	2.49883	2.52546	2.55599	2.5917	2.63458
	Nb/Y	0.0583333	0.045804	0.0349549	0.0257286	0.0180623	0.0118865
olivine	La/Yb	2.47525	2.48832	2.50302	2.51979	2.53928	2.56254
	Nb/Y	0.0583333	0.0516741	0.0451255	0.0386992	0.0324101	0.0262774
Mineral Kds taken from GERM website (https://earthref.org/KDD/)
	ol	plag	opx	ap	mg	ilm	cpx
Y	0.004	0.03	0.2	6	0.03	0.005	1.893
Yb	0.02	0.03	0.1	8.1	0.02	0.17	2
Nb	0.01	0.02	0.0015	0.001	0.01	2.3	0.065
La	0.01	0.1	0.001	4.9	0.03	0.08	0.229

## Sheet: Mantle source melting
Source reservoirs, modal assemblages and partition coefficients used		ppm
in mantle source melting models		Rb	Ba	Th	U	Nb	Ta	La	Ce	Pb	Pr	Sr	Nd	Sm	Zr	Hf	Eu	Tb	Dy	Er	Y	Yb	Lu
DMM	Workman & Hart 2005	0.05	0.563	0.0079	0.0032	0.1485	0.0096	0.192	0.55	0.018	0.107	7.664	0.581	0.239	5.082	0.157	0.096	0.07	0.505	0.348	3.328	0.365	0.058
Carnegie Ridge Basalt 12-DR-1	Harpp et al., 2004	4.45	40	0.65	0.23	8.79	0.52	7.03	16.7	0.48	2.48	184	11.5	3.42	85.9	2.2	1.22	0.72	4.53	2.73	26.9	2.46	0.37
Columbia 504 sediment	Plank & Langmuir 1998	3.3	1950	0.4	0.7	2.44	0.17	21.19	7.75	1		685	16.39	3.81	51	1.46	0.98		4.25	2.74	14	1.4	0.41
slab fluid from CRB (F=0.23)	800°C 4GPa exp. Kessel et al., 2005	0.000295225	17.6898	0.331079	0.233377	1.96037	0.0313527	7.33585	10.3314	0.0825711		276.32	2.09888	0.283838	4.30666	0.141002	0.0751038		0.0586776	0.0177041	0.313677	0.0127659	0.00239946
N-type MORB	Sun & McDonough 1989	0.56	6.3	0.12	0.047	2.33	0.132	2.5	7.5	0.3	1.32	90	7.3	2.63	74	2.05	1.02	0.67	4.55	2.97	28	3.05	0.455
Metasomatised mantle melting
DMM Modal Assemblage	Falloon & Green 1988			melt reaction Robinson et al., 1998
Ol	0.614			cpx + opx + spinel = melt + ol
Opx	0.201			cpx	opx	spinel	melt	ol
Cpx	0.174			0.58	0.61	0.001	1	0.19
Spinel	0.01
Kds
cpx	McDade et al., 2003 &	0.0004	0.0003	0.021	0.018	0.012	0.035	0.071	0.122	0.0075	0.15	0.074	0.19	0.27	0.18	0.33	0.354		0.44	0.76	0.47	0.76	0.74
opx	Halliday et al., 1999	0.0002	6e-07	0.0032	0.0047	0.0011	0.0049	0.0008	0.0047	0.0014	0.0026	0.003	0.0023	0.0037	0.027	0.019	0.0158		0.011	0.103	0.015	0.168	0.181
olivine		0.0003	5e-07	1.4e-05	5.9e-05	0.0001	0.0006			0.0003	0.0003	0.00018	0.0003	0.0009	0.00015	0.0029	0.00036		0.0027	0.0023	0.0082	0.0096	0.0089
Slab melting
rutile bearing eclogite	Kds
Garnet = 0.6	Xiong 2006	0.001	0.0003	0.03	0.08	0.005	0.02	0.0018	0.01			0.001	0.18	1.047	0.89	0.5	0.72	6.1	7.52	12.9	15.4	35.5	37.3
Cpx = 0.393	Xiong 2006	0.06	0.07	0.07	0.05	0.08	0.07	0.07	0.1			0.05	0.1	0.15	0.08	0.1	0.69	0.65	1.56	1.74	1.09	1.72	2.46
Rutile = 0.007	Xiong et al., 2005					94	129								5	7.1
mineral modes from Xiong 2006
Sediment melting
Drs 800°C melting exp.	Johnson & Plank 2000	1.55	1.64	1.45	1.07	1.42	1.51	2.47	2.97	0.78		0.67	4.41	4.17			8.11		10	10.1	10.7	9.68	9.28

## Sheet: References
Geochemical data references
1	Ancellin et al., 2017	Ancellin, M. A. et al. Across‐arc versus along‐arc Sr‐Nd‐Pb isotope variations in the Ecuadorian volcanic arc. Geochemistry, Geophysics, Geosystems 18, 1163-1188 (2017).
2	Hidalgo et al., 2012	Hidalgo, S., Gerbe, M. C., Martin, H., Samaniego, P. & Bourdon, E. Role of crustal and slab components in the Northern Volcanic Zone of the Andes (Ecuador) constrained by Sr–Nd–O isotopes. Lithos 132, 180-192 (2012).
3	Barragan et al., 1998	Barragan, R., Geist, D., Hall, M., Larson, P. & Kurz, M. Subduction controls on the compositions of lavas from the Ecuadorian Andes. Earth and Planetary Science Letters 154, 153-166 (1998).
4	Bryant et al., 2006	Bryant, J., Yogodzinski, G., Hall, M., Lewicki, J. & Bailey, D. Geochemical constraints on the origin of volcanic rocks from the Andean Northern Volcanic Zone, Ecuador. Journal of petrology 47, 1147-1175 (2006).
5	Samaniego et al., 2005	Samaniego, P. et al. Temporal evolution of magmatism in the Northern Volcanic Zone of the Andes: the geology and petrology of Cayambe Volcanic Complex (Ecuador). Journal of petrology 46, 2225-2252 (2005).
6	Hidalgo et al., 2007	Hidalgo, S. et al. Adakitic magmas in the Ecuadorian volcanic front: petrogenesis of the Iliniza volcanic complex (Ecuador). Journal of Volcanology and Geothermal Research 159, 366-392 (2007).
7	Samaniego et al., 2010	Samaniego, P., Robin, C., Chazot, G., Bourdon, E. & Cotten, J. Evolving metasomatic agent in the Northern Andean subduction zone, deduced from magma composition of the long-lived Pichincha volcanic complex (Ecuador). Contributions to Mineralogy and Petrology 160, 239-260 (2010).
8	Chiaradia et al., 2009	Chiaradia, M., Müntener, O., Beate, B. & Fontignie, D. Adakite-like volcanism of Ecuador: lower crust magmatic evolution and recycling. Contributions to Mineralogy and Petrology 158, 563-588 (2009).
9	Hoffer et al., 2008	Hoffer, G. et al. Geochemical and petrological constraints on rear-arc magma genesis processes in Ecuador: The Puyo cones and Mera lavas volcanic formations. Journal of Volcanology and Geothermal Research 176, 107-118 (2008).
10	Samaniego et al., 2008	Samaniego, P. et al. Pre-eruptive physical conditions of El Reventador volcano (Ecuador) inferred from the petrology of the 2002 and 2004–05 eruptions. Journal of Volcanology and Geothermal Research 176, 82-93 (2008).
11	Bourdon et al., 2003	Bourdon, E. et al. Magmatic response to early aseismic ridge subduction: the Ecuadorian margin case (South America). Earth and Planetary Science Letters 205, 123-138 (2003).
12	Garrison et al., 2018	Garrison, J. M. et al. Shallow-level differentiation of phonolitic lavas from Sumaco Volcano, Ecuador. Contributions to Mineralogy and Petrology 173, 6 (2018).
13	Bourdon et al., 2002	Bourdon, E. et al. Adakite-like lavas from Antisana Volcano (Ecuador): evidence for slab melt metasomatism beneath Andean Northern Volcanic Zone. Journal of Petrology 43, 199-217 (2002).
14	Garrison et al., 2011	Garrison, J. M., Davidson, J. P., Hall, M. & Mothes, P. Geochemistry and petrology of the most recent deposits from Cotopaxi Volcano, Northern Volcanic Zone, Ecuador. Journal of Petrology 52, 1641-1678 (2011).
15	Robin et al., 2009	Robin, C. et al. Evolution of the late Pleistocene Mojanda–Fuya Fuya volcanic complex (Ecuador), by progressive adakitic involvement in mantle magma sources. Bulletin of Volcanology 71, 233 (2009).
16	Nauret et al., 2018	Nauret, F. et al. The genetic relationship between andesites and dacites at Tungurahua volcano, Ecuador. Journal of Volcanology and Geothermal Research (2017).
17	Samaniego et al., 2011	Samaniego, P., Le Pennec, J.-L., Robin, C. & Hidalgo, S. Petrological analysis of the pre-eruptive magmatic process prior to the 2006 explosive eruptions at Tungurahua volcano (Ecuador). Journal of Volcanology and Geothermal Research 199, 69-84 (2011).
18	Hoffer 2008	Hoffer, G. Fusion partielle d'un manteau métasomatisé par un liquide adakitique: approches géochimique et expérimentale de la genèse et de l'évolution des magmas de l'arrière-arc équatorien, Université Blaise Pascal-Clermont-Ferrand II, (2008).
Mantle source melting references
	Workman & Hart 2005	Workman, R. K. & Hart, S. R. Major and trace element composition of the depleted MORB mantle (DMM). Earth Planet. Sci. Lett. 231, 53-72, (2005).
	Harpp et al., 2004	Harpp, K. S., Wanless, V. D., Otto, R. H., Hoernle, K. & Werner, R. The Cocos and Carnegie aseismic ridges: A trace element record of long-term plume–spreading center interaction. J. Petrol. 46, 109-133, (2004).
	Plank & Langmuir 1998	Plank, T. & Langmuir, C. H. The chemical composition of subducting sediment and its consequences for the crust and mantle. Chem. Geol. 145, 325-394, (1998).
	Kessel et al., 2005	Kessel, R., Schmidt, M. W., Ulmer, P. & Pettke, T. Trace element signature of subduction-zone fluids, melts and supercritical liquids at 120–180 km depth. Nature 437, 724, (2005).
	Sun & McDonough 1989	Sun, S.-S. & McDonough, W.-s. Chemical and isotopic systematics of oceanic basalts: implications for mantle composition and processes. Geological Society, London, Special Publications 42, 313-345, (1989).
	Falloon & Green 1988	Falloon, T. & Green, D. Anhydrous partial melting of peridotite from 8 to 35 kb and the petrogenesis of MORB. Journal of Petrology, 379-414 (1988).
	Robinson et al., 1998	Robinson, J., Wood, B. & Blundy, J. The beginning of melting of fertile and depleted peridotite at 1.5 GPa. Earth Planet. Sci. Lett. 155, 97-111, (1998)
	McDade et al., 2003	McDade, P., Blundy, J. D. & Wood, B. J. Trace element partitioning on the Tinaquillo Lherzolite solidus at 1.5 GPa. Phys. Earth Planet. Int. 139, 129-147, (2003).
	Halliday et al., 1999	Halliday, A. N. et al. Incompatible trace elements in OIB and MORB and source enrichment in the sub-oceanic mantle. Earth Planet. Sci. Lett. 133, 379-395, (1995).
	Xiong 2006	Xiong, X.-L. Trace element evidence for growth of early continental crust by melting of rutile-bearing hydrous eclogite. Geology 34, 945-948 (2006).
	Xiong et al., 2005	Xiong, X., Adam, J. & Green, T. Rutile stability and rutile/melt HFSE partitioning during partial melting of hydrous basalt: implications for TTG genesis. Chem. Geol. 218, 339-359, (2005).
	Johnson & Plank 2000	Johnson, M. C. & Plank, T. Dehydration and melting experiments constrain the fate of subducted sediments. Geochemistry, Geophysics, Geosystems 1, (2000).
